# Supplementary material for: The Emergence of Informative Higher Scales in Complex Networks
Source: Hindawi journal article supplement (doi:10.1155/2020/8932526), 2020-04-04
Supplement: f1 [file 8932526.f1.zip]

| Network name                   | Domain         | Source            | Cat. | Description                                          |
|--------------------------------|----------------|-------------------|------|------------------------------------------------------|
| HEP-th citations               | Citation       | Konect            | Inf. | high-energy physics (HEP) citations - theory         |
| HEP-ph citations               | Citation       | Konect            | Inf. | HEP citations - phenomenology                        |
| Cora citations                 | Citation       | Konect            | Inf. | citations from the Cora database                     |
| DBLP citations                 | Citation       | Konect            | Inf. | database of scientific publications                  |
| Astro-ph coauthorships         | Coauthorship   | Konect            | Inf. | coauthors on astronomy arXiv papers                  |
| HEP-th coauthorships           | Coauthorship   | Konect            | Inf. | coauthors on HEP-theory arXiv papers                 |
| HEP-ph coauthorships           | Coauthorship   | Konect            | Inf. | coauthors on HEP-phenomenology arXiv papers          |
| Tarragona univ. emails         | Communication  | Konect            | Soc. | emails from the University Rovira i Virgili          |
| Dem. Nat. Comm. emails         | Communication  | Konect            | Soc. | 2016 Democratic National Committee email leak        |
| Digg user-user replies         | Communication  | Konect            | Soc. | reply network from the social news website Digg      |
| UC Irvine messages             | Communication  | Konect            | Soc. | messages between students at UC Irvine               |
| Manufacturing emails           | Communication  | Konect            | Soc. | internal emails between employees at a company       |
| CAIDA autonomous systems       | Computer       | Konect            | Tec. | autonomous systems network from CAIDA, 2007          |
| Route views autonomous systems | Computer       | Konect            | Tec. | autonomous systems network                           |
| Internet autonomous systems    | Computer       | Konect            | Tec. | connected IP routing                                 |
| Haggle RFID contact            | Human Contact  | Konect            | Soc. | human proximity, via carried wireless devices        |
| Reality mining RFID            | Human Contact  | Konect            | Soc. | RFID data from 100 MIT students' interactions        |
| California windsurfers         | Human Contact  | Konect            | Soc. | contacts between windsurfers California, 1986        |
| Train terrorists               | Human Contact  | Konect            | Soc. | contacts between Madrid train bombing suspects       |
| Hypertext conference           | Human Contact  | Konect            | Soc. | face-to-face contacts at the ACM Hypertext 2009      |
| Infectious conference          | Human Contact  | Konect            | Soc. | face-to-face contacts at INFECTIOUS, 2009            |
| Jazz musicians                 | Human Social   | Konect            | Soc. | collaboration network between Jazz musicians         |
| Adolescent health              | Human Social   | Konect            | Soc. | surveyed students list their best friends            |
| Physicians                     | Human Social   | Konect            | Soc. | innovation spread network among 246 physicians       |
| Resident hall                  | Human Social   | Konect            | Soc. | friendship ratings between students in a dorm        |
| Sampson cloister               | Human Social   | Konect            | Soc. | relations between monks in a monastery               |
| Seventh graders                | Human Social   | Konect            | Soc. | proximity ratings between seventh grade students     |
| Taro gift-giving               | Human Social   | Konect            | Soc. | gift-givings (taro) between households               |
| Dutch college                  | Human Social   | Konect            | Soc. | friendship ratings between university freshmen       |
| Highland tribes                | Human Social   | Konect            | Soc. | tribes in the Gahuku-Gama alliance structure         |
| Illinois school                | Human Social   | Konect            | Soc. | friendships between boys at an Illinois highschool   |
| Free online dict.              | Hyperlink      | Konect            | Inf. | cross references in Free Online Dict. of Computing   |
| Political blogs                | Hyperlink      | Konect            | Inf. | hyperlinks between blogs, 2004 US election           |
| Google internal                | Hyperlink      | Konect            | Inf. | hyperlink network from pages within Google.com       |
| Air traffic control            | Infrastructure | Konect            | Tec. | USA's FAA, Preferred Routes Database                 |
| OpenFlights v1                 | Infrastructure | Konect            | Tec. | flight network between airports, OpenFlights.org     |
| OpenFlights v2                 | Infrastructure | Konect            | Tec. | flight network between airports, OpenFlights.org     |
| Contiguous U.S.                | Infrastructure | Konect            | Tec. | 48 contiguous states and D.C. of the U.S.            |
| European roads                 | Infrastructure | Konect            | Tec. | international E-road network, mainly in Europe       |
| Chicago roads                  | Infrastructure | Konect            | Tec. | road transportation network of the Chicago region    |
| West U.S. powergrid            | Infrastructure | Konect            | Tec. | power grid of the Western U.S.                       |
| U.S. Airports                  | Infrastructure | Konect            | Tec. | flights between US airports in 2010                  |
| David Copperfield              | Lexical        | Konect            | Inf. | network of common noun and adjective adjacencies     |
| Edinburgh thesaurus            | Lexical        | Konect            | Inf. | word association network, collected experimentally   |
| King James Bible               | Lexical        | Konect            | Inf. | co-occurrence between nouns in the Bible             |
| C. elegans metabolic           | Metabolic      | Konect            | Bio. | metabolic network of the <i>C. elegans</i> roundworm |
| Human protein (Figeys)         | Metabolic      | Konect            | Bio. | interactions network of proteins in Humans           |
| PDZbase protein                | Metabolic      | Konect            | Bio. | protein-protein interactions from PDZBase            |
| Human protein (Stelzl)         | Metabolic      | Konect            | Bio. | interactions network of proteins in Humans           |
| Human protein (Vidal)          | Metabolic      | Konect            | Bio. | proteome-scale map of Human protein interactions     |
| Yeast protein                  | Metabolic      | Konect            | Bio. | protein interactions contained in yeast              |
| Reactome humans                | Metabolic      | Konect            | Bio. | protein interactions, from the Reactome project      |
| Avogato                        | Social         | Konect            | Soc. | trust network for users of Advogato                  |
| Google+                        | Social         | Konect            | Soc. | Google+ user-user connections                        |
| Hamsterster                    | Social         | Konect            | Soc. | friendships between users of hamsterster.com         |
| Twitter lists                  | Social         | Konect            | Soc. | Twitter user-user following network                  |
| Facebook NIPS                  | Social         | Konect            | Soc. | Facebook user-user friendship network                |
| Linux dependency               | Software       | Konect            | Inf. | Linux source code dependency network                 |
| J.D.K. dependency              | Software       | Konect            | Inf. | software class dependencies, JDK 1.6.0.7             |
| JUNG/javax dependency          | Software       | Konect            | Inf. | software class dependencies, JUNG 2.0.1 & javax      |
| Florida ecosystem - dry        | Trophic        | Konect            | Bio. | food web in the Florida wetlands (dry season)        |
| Florida ecosystem - wet        | Trophic        | Konect            | Bio. | food web in the Florida wetlands (wet season)        |
| Little Rock Lake ecosystem     | Trophic        | Konect            | Bio. | food web of Little Rock Lake, Wisconsin              |
| WHOIS protocol                 | Technological  | NetworkRepository | Tec. | dataset of internet routing registries               |
| PGP protocol                   | Technological  | NetworkRepository | Tec. | trust protocol of private keys of internet users     |
| Routers RF                     | Technological  | NetworkRepository | Tec. | traceroute network between routers via Rocketfuel    |
| Cat brain 1                    | Brain          | NetworkRepository | Bio. | fiber tracts between brain regions of a cat          |
| Drosophila medulla             | Brain          | NetworkRepository | Bio. | neuronal network from the medulla of a fly           |
| Rhesus brain 1                 | Brain          | NetworkRepository | Bio. | collation of tract tracing studies in primates       |
| Rhesus brain 2                 | Brain          | NetworkRepository | Bio. | inter-areal cortical networks from a primate         |
| Macaque cerebral               | Brain          | NetworkRepository | Bio. | connections between cerebral cortex of a primate     |
| Macaque interareal             | Brain          | NetworkRepository | Bio. | inter-areal cortical networks from a primate         |
| Mouse Kasthuri                 | Brain          | NetworkRepository | Bio. | neuronal network of a mouse                          |
| Mouse brain 1                  | Brain          | NetworkRepository | Bio. | calcium imaging of neuronal networks in a mouse      |
| Mouse retina 1                 | Brain          | NetworkRepository | Bio. | electron microscopy of neurons in mouse retina       |
| Mouse visual 1                 | Brain          | NetworkRepository | Bio. | electron microscopy of visual cortex of a mouse      |
| Mouse visual 2                 | Brain          | NetworkRepository | Bio. | electron microscopy of visual cortex of a mouse      |
| Power 1138BUS                  | Powergrid      | NetworkRepository | Tec. | power system admittance, via Harwell-Boeing          |
| Power 494BUS                   | Powergrid      | NetworkRepository | Tec. | power system admittance, via Harwell-Boeing          |
| Power 662BUS                   | Powergrid      | NetworkRepository | Tec. | power system admittance, via Harwell-Boeing          |
| Power 685BUS                   | Powergrid      | NetworkRepository | Tec. | power system admittance, via Harwell-Boeing          |
| U.S. power grid                | Powergrid      | NetworkRepository | Tec. | electricity / power transmission network in the U.S. |
| Power pcspwr 09                | Powergrid      | NetworkRepository | Tec. | BCSPWR09 powergrid data via Harwell-Boeing           |
| Power pcspwr 10                | Powergrid      | NetworkRepository | Tec. | BCSPWR10 powergrid data via Harwell-Boeing           |
| Power ERIS1176                 | Powergrid      | NetworkRepository | Tec. | powergrid data via Erisman, 1973                     |
