# Supplementary material for: The Emergence of Informative Higher Scales in Complex Networks
Source: Hindawi journal article supplement (doi:10.1155/2020/8932526), 2020-04-04
Supplement: f1 [file 8932526.f1.zip]

Archive with 15 entries (15 files):
- 8932526.f1/15_inacc_comparison.pdf
- 8932526.f1/2020_KleinHoel_Complexity_supplemental - SI.pdf
- 8932526.f1/CausalEmergence_SBM_mean_N100c_wNets.pdf
- 8932526.f1/CE_ER_k_N.pdf
- 8932526.f1/CE_ER_p_N.pdf
- 8932526.f1/EffectiveInfoCalculation_KLD.pdf
- 8932526.f1/EffectiveInfoCalculation_Network_TPM.pdf
- 8932526.f1/EffectiveInformation_Compare_StarLine.pdf
- 8932526.f1/EffectiveInformation_NetworkMotifs.pdf
- 8932526.f1/Konect_SortedEffectiveness_withLabels.pdf
- 8932526.f1/supplemental_information - Hoel Klein.tex
- 8932526.f1/table_SI1.pdf
- 8932526.f1/table_SI1.tex
- 8932526.f1/table_SI2.pdf
- 8932526.f1/table_SI2.tex
