# Supplementary material for: The Emergence of Informative Higher Scales in Complex Networks
Source: Hindawi journal article supplement (doi:10.1155/2020/8932526), 2020-04-04
Supplement: f1 [file 8932526.f1.zip]

| Term                                                     | Description                                                                                                                                   | Notation                                                                                                                                    |
|----------------------------------------------------------|-----------------------------------------------------------------------------------------------------------------------------------------------|---------------------------------------------------------------------------------------------------------------------------------------------|
| Network size                                             | the number of nodes in the network                                                                                                            | $N$                                                                                                                                         |
| Out-weight vector ( $v_i$ )                              | a vector of probabilities $w_{ij}$ that a random walker on node $v_i$ will transition to $v_j$                                                | $W_i^{out} = \{w_{i1}, w_{i2}, , ...w_{ij}, ...w_{iN}\}$                                                                                    |
| Effective information (network)                          | the total information in a causal structure, in bits                                                                                          | $EI = H(\langle W_i^{out} \rangle) - \langle H(W_i^{out}) \rangle$                                                                          |
| Determinism ( $v_i$ )                                    | how certain about next steps is a random walker on $v_i$                                                                                      | $\text{det}_i = \log_2(N) - H(W_i^{out})$                                                                                                   |
| Degeneracy (network)                                     | how distributed the certainty is over the nodes of the network                                                                                | $\text{degeneracy} = \log_2(N) - H(\langle W_i^{out} \rangle)$                                                                              |
| Effect information ( $v_i$ )                             | the contribution of each node $v_i$ to the network's $EI$                                                                                     | $EI_i = D_{KL}[W_i^{out}    \langle W_i^{out} \rangle]$                                                                                     |
| Micro-nodes in a macro-node                              | the set of micro-nodes grouped into a macro-node in the new network, $G_M$                                                                    | $S = \{v_i, v_j, ... \}$ , of length $N_S$                                                                                                  |
| Macro-node out-weights                                   | the out-weights from macro-node, $\mu$ , to its neighbors                                                                                     | $W_\mu^{out} = \sum_{i \in S} W_i^{out} \cdot \left( \frac{1}{N_S} \right)$                                                                 |
| Macro-node out-weights given input weights               | the out-weights from macro-node, $\mu$ , to its neighbors, <i>conditioned</i> on in-weights to the micro-nodes, $v_i \in S$                   | $W_{\mu j}^{out} = \sum_{i \in S} W_i^{out} \cdot \left( \frac{\sum_{j \rightarrow i} w_{ji}}{\sum_{j \rightarrow k \in S} w_{jk}} \right)$ |
| Macro-node out-weights given the stationary distribution | the out-weights from macro-node, $\mu$ , to its neighbors, conditioned on the stationary probabilities, $\pi_i$ , of micro-nodes, $v_i \in S$ | $W_{\mu \pi}^{out} = \sum_{i \in S} W_i^{out} \cdot \left( \frac{\pi_i}{\sum_{k \in S} \pi_k} \right)$                                      |
