# Supplementary material for: The Emergence of Informative Higher Scales in Complex Networks
Source: Hindawi journal article supplement (doi:10.1155/2020/8932526), 2020-04-04
Supplement: f1 [file 8932526.f1.zip › 8932526.f1/2020_KleinHoel_Complexity_supplemental - SI.pdf]

## V. SUPPLEMENTARY MATERIALS

### A. Table of key terms

A table of key terms can be found in Table I.

### B. Effective information calculation

Mathematically,  $EI$  has been expressed in a number of previous ways. The first was as the mutual information between two subsets of a system (while injecting noise into one), originally proposed as a step in the calculation of integrated information between neuron-like elements [47, 48]. More recently, it was pointed out that in general an intervention distribution,  $I_D$ , defined as a probability distribution over the  $do(x)$  operator (as in [14]), creates some resultant effect distribution,  $E_D$ . Then the  $EI$  is the mutual information,  $I(I_D; E_D)$ , between the two, when the interventions are done like a randomized trial to reveal the dependencies (i.e., at maximum entropy [16, 49]).

In order to calculate the total information contained in the causal relationships of a system,  $EI$  is applied to the system as a whole [11]. There,  $EI$  was defined over the set of all states of a system and its state transitions. Because the adjacency matrix of a network can be cast as a transition matrix (as in Fig. 7a), the  $EI$  of a network can be expressed as:

$$EI = \frac{1}{N} \sum_{i=1}^N D_{KL}[W_i^{out} || \langle W_i^{out} \rangle] \quad (7)$$

where  $EI$  is the average of the *effect information*,  $EI_i$ , of each node (see Table I and Fig. 7b). This is equivalent to our derivation of  $EI$  from first principles in Equation 1, since:

$$\begin{aligned} EI &= \frac{1}{N} \sum_{i=1}^N D_{KL}[W_i^{out} || \langle W_i^{out} \rangle] \\ &= \frac{1}{N} \sum_{i=1}^N \sum_{j=1}^N w_{ij} \log_2 \left( \frac{w_{ij}}{W_j} \right) \\ &= \frac{1}{N} \sum_{i=1}^N \left( \sum_{j=1}^N w_{ij} \log_2(w_{ij}) - \sum_{j=1}^N w_{ij} \log_2(W_j) \right) \\ &= \frac{1}{N} \sum_{i=1}^N \sum_{j=1}^N w_{ij} \log_2(w_{ij}) - \frac{1}{N} \sum_{i=1}^N \sum_{j=1}^N w_{ij} \log_2(W_j) \end{aligned} \quad (8)$$

Note that for a given node,  $v_i$ , the term in the first summation in Equation 8 above,  $\sum_{j=1}^N w_{ij} \log_2(w_{ij})$ , is equivalent to the negative entropy of the out-weights

from  $v_i$ ,  $-H(W_i^{out})$ . Also note that  $W_j$ , the  $j$ th element in the  $\langle W_i^{out} \rangle$  vector, is the normalized sum of the incoming weights to  $v_j$  from its neighbors,  $v_i$ , such that

$W_j = \frac{1}{N} \sum_{i=1}^N w_{ij}$ . We substitute these two terms into Equation 8 above such that:

$$EI = \frac{1}{N} \sum_{i=1}^N -H(W_i^{out}) - \sum_{j=1}^N W_j \log_2(W_j) \quad (9)$$

This is equivalent to the formulation of  $EI$  from Equation 1, since  $H(\langle W_i^{out} \rangle) = - \sum_{j=1}^N W_j \log_2(W_j)$ :

$$EI = H(\langle W_i^{out} \rangle) - \langle H(W_i^{out}) \rangle \quad (1)$$

In the derivations of SM VC we adopt the relative entropy formulation of  $EI$  from Equation 7 for ease of derivation. For a visual intuition behind the calculations involved in this formulation of  $EI$ , see how the network in Fig. 7a is used to calculate its  $EI$  (Fig. 7b), by calculating the mean effect information,  $EI_i$ , of nodes in the network.

### C. Deriving the effective information of common network structures

Here we inspect the  $EI$  for iconic graphical structures, and in doing so, we see several interesting relationships between a network structure and its  $EI$ . First, however, we will introduce key terminology and assumptions.

Let  $\langle k \rangle$  be the average degree of a network,  $G$ , and each node,  $v_i$ , has degree,  $k_i$ . In directed graphs each  $v_i$  has an in-degree,  $k_i^{in}$ , and an out-degree,  $k_i^{out}$ . These correspond to the number of edges leading in to  $v_i$  and edges going out from  $v_i$ . The total number of edges in  $G$  is represented by  $E$ . In undirected Erdős-Rényi (ER) networks, the total number of edges is given by  $E = p \frac{N(N-1)}{2}$ , where  $p$  represents the probability that any two nodes,  $v_i$  and  $v_j$ , will be connected. In the following subsections, we derive the  $EI$  of several prototypical network structures, from random graphs to ring lattices to star networks. Note that for the following derivations we proceed from the relative entropy formalism from SM VB, and note that therefore  $N$  is the number of nodes with the output,  $N = N_{out}$ .

#### 1. Derivation: effective information of ER networks

In Erdős-Rényi networks,  $EI$  does not depend on the number of nodes in the network,  $N$ . Instead, the network's  $EI$  reaches its maximum at  $-\log_2(p)$ . This is because in ER networks, each node is expected to connect to  $\langle k \rangle = pN$  neighboring nodes, such that every value

| Term                                                     | Description                                                                                                                                   | Notation                                                                                                              |
|----------------------------------------------------------|-----------------------------------------------------------------------------------------------------------------------------------------------|-----------------------------------------------------------------------------------------------------------------------|
| Network size                                             | the number of nodes in the network                                                                                                            | $N$                                                                                                                   |
| Out-weight vector ( $v_i$ )                              | a vector of probabilities $w_{ij}$ that a random walker on node $v_i$ will transition to $v_j$                                                | $W_i^{out} = \{w_{i1}, w_{i2}, \dots, w_{ij}, \dots, w_{iN}\}$                                                        |
| Effective information (network)                          | the total information in a causal structure, in bits                                                                                          | $EI = H(\langle W_i^{out} \rangle) - \langle H(W_i^{out}) \rangle$                                                    |
| Determinism ( $v_i$ )                                    | how certain about next steps is a random walker on $v_i$                                                                                      | $\det_i = \log_2(N) - H(W_i^{out})$                                                                                   |
| Degeneracy (network)                                     | how distributed the certainty is over the nodes of the network                                                                                | $\text{degeneracy} = \log_2(N) - H(\langle W_i^{out} \rangle)$                                                        |
| Effect information ( $v_i$ )                             | the contribution of each node $v_i$ to the network's $EI$                                                                                     | $EI_i = D_{KL}[W_i^{out}    \langle W_i^{out} \rangle]$                                                               |
| Micro-nodes in a macro-node                              | the set of micro-nodes grouped into a macro-node in the new network, $G_M$                                                                    | $S = \{v_i, v_j, \dots\}$ , of length $N_S$                                                                           |
| Macro-node out-weights                                   | the out-weights from macro-node, $\mu$ , to its neighbors                                                                                     | $W_\mu^{out} = \sum_{i \in S} W_i^{out} \cdot \left(\frac{1}{N_S}\right)$                                             |
| Macro-node out-weights given input weights               | the out-weights from macro-node, $\mu$ , to its neighbors, <i>conditioned</i> on in-weights to the micro-nodes, $v_i \in S$                   | $W_{\mu j}^{out} = \sum_{i \in S} W_i^{out} \cdot \left(\frac{\sum_{j > i} w_{ji}}{\sum_{j > k \in S} w_{jk}}\right)$ |
| Macro-node out-weights given the stationary distribution | the out-weights from macro-node, $\mu$ , to its neighbors, conditioned on the stationary probabilities, $\pi_i$ , of micro-nodes, $v_i \in S$ | $W_{\mu \pi}^{out} = \sum_{i \in S} W_i^{out} \cdot \left(\frac{\pi_i}{\sum_{k \in S} \pi_k}\right)$                  |

TABLE I. **Table of key terms.** Quantities needed in order to calculate  $EI$  and create consistent macro-nodes.

in  $W_i^{out} = \frac{1}{\langle k \rangle}$  and every value in  $\langle W_i^{out} \rangle = \frac{\langle k \rangle}{N \langle k \rangle} = \frac{1}{N}$ , which can be represented as:

$$EI_{ER} = \frac{1}{N} \sum_i D_{KL} \left[ \left( \frac{1}{\langle k \rangle}, \frac{1}{\langle k \rangle}, \dots \right) || \left( \frac{1}{N}, \frac{1}{N}, \dots \right) \right]$$

Each node in an ER network is expected to be identical to all other nodes in the network, and calculating the expected *effect information*,  $EI_i$ , is equivalent to calculating the network's  $EI$ . As such, we observe:

$$EI_i = \sum_{j=1}^{k_i} \frac{1}{\langle k \rangle} \cdot \log_2 \left( \frac{\frac{1}{\langle k \rangle}}{\frac{1}{N}} \right) = \log_2 \left( \frac{N}{pN} \right)$$

$$EI_{ER} = \frac{1}{N} \cdot \sum_i -\log_2(p) = -\log_2(p) \quad (10)$$

## 2. Derivation: effective information of ring-lattice and star networks

Here, we compare two classes of networks with the same average degree—ring lattice networks and star, or hub-and-spoke, graphs (see Fig. 8). In each network, we

assume an average degree  $\langle k \rangle = 2d$ , with  $d$  being the dimension. The  $EI$  of star network,  $EI_{star}$ , approaches 0.0 as  $N$  gets larger, while the  $EI$  of ring lattices approaches  $\log_2(N) - \log_2(2d)$ . These derivations are shown below, first for the  $d$ -dimensional ring lattice,  $EI_d$ .

As every node in a ring lattice is connected to its  $2d$  neighbors, each element of  $\langle W_i^{out} \rangle$  is  $\frac{1}{2d}$  and each element of  $W^{in}$  is  $\frac{2d}{2d \times N} = \frac{1}{N}$ .

$$EI_d = \frac{1}{N} \cdot \sum_i D_{KL} \left[ \left( \frac{1}{2d}, \frac{1}{2d}, \dots \right) || \left( \frac{1}{N}, \frac{1}{N}, \dots \right) \right] \quad (11)$$

Each node in a  $d$ -dimensional ring lattice is expected to be identical, so calculating the expected *effect information*,  $EI_i$ , is equivalent to calculating the network's  $EI$ . As such, we observe:

$$EI_i = \sum_{j=1}^{2d} \frac{1}{2d} \cdot \log_2 \left( \frac{\frac{1}{2d}}{\frac{1}{N}} \right) = \log_2 \left( \frac{N}{2d} \right)$$

$$EI_d = \log_2(N) - \log_2(2d) \quad (12)$$

Note: the  $EI$  of ring lattice networks reduces to simply the *determinism* of the network. The  $EI$  of ring lattice networks scale logarithmically with the size of the network, which is contrasted by the behavior of  $EI$  in star

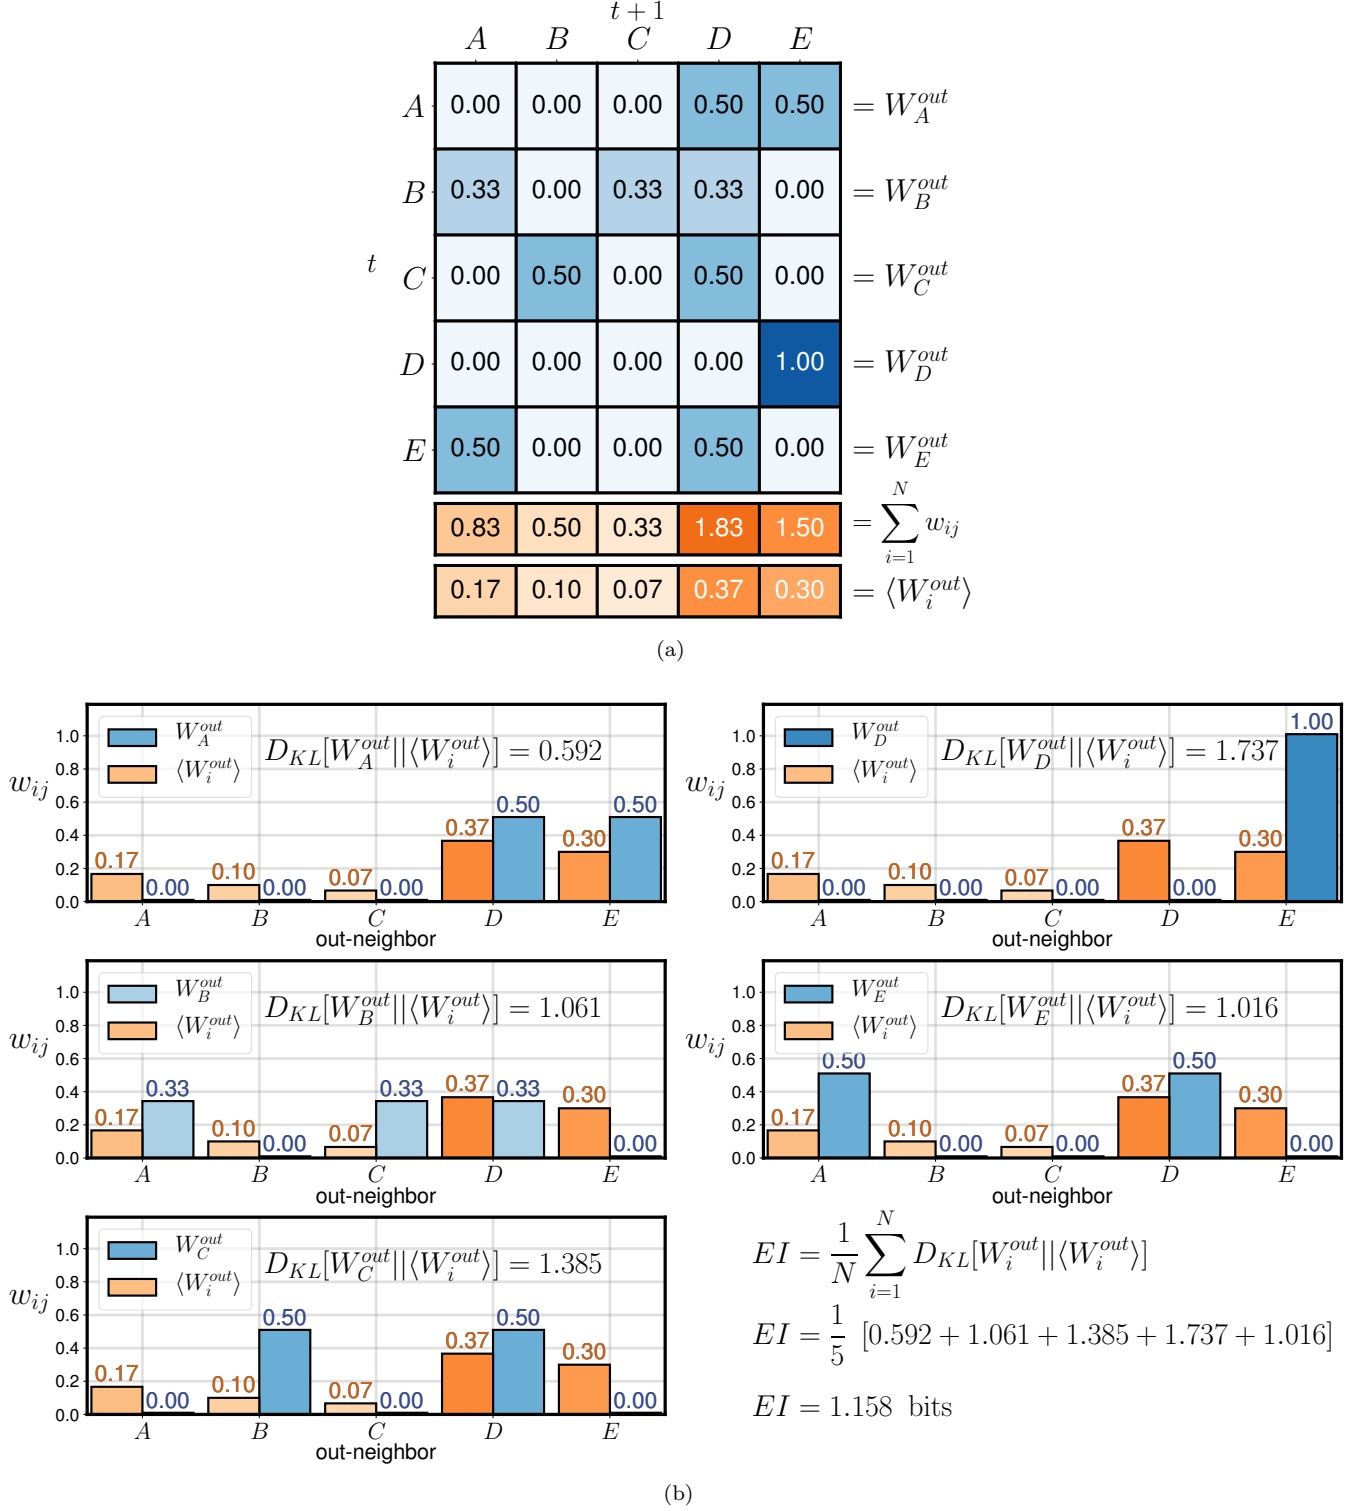

FIG. 7. **Illustration of the calculation of effective information.** (A) The adjacency matrix of a network with 1.158 bits of  $EI$  (calculation shown in (B)). The rows correspond to  $W_i^{out}$ , a vector of probabilities that a random walker on node  $v_i$  at time  $t$  transitions to  $v_j$  in the following time step,  $t + 1$ .  $\langle W_i^{out} \rangle$  represents the (normalized) input weight distribution of the network, that is, the probabilities that a random walker will arrive at a given node  $v_j$  at  $t + 1$ , after a uniform introduction of random walkers into the network at  $t$ . (B) Each node's contribution to the  $EI$  ( $EI_i$ ) is the KL divergence of its  $W_i^{out}$  vector from the network's  $\langle W_i^{out} \rangle$ , known as the *effect information*.

networks. Star networks have a hub-and-spoke structure, where  $N - 1$  nodes of degree  $k_{spoke} = 1$  are connected

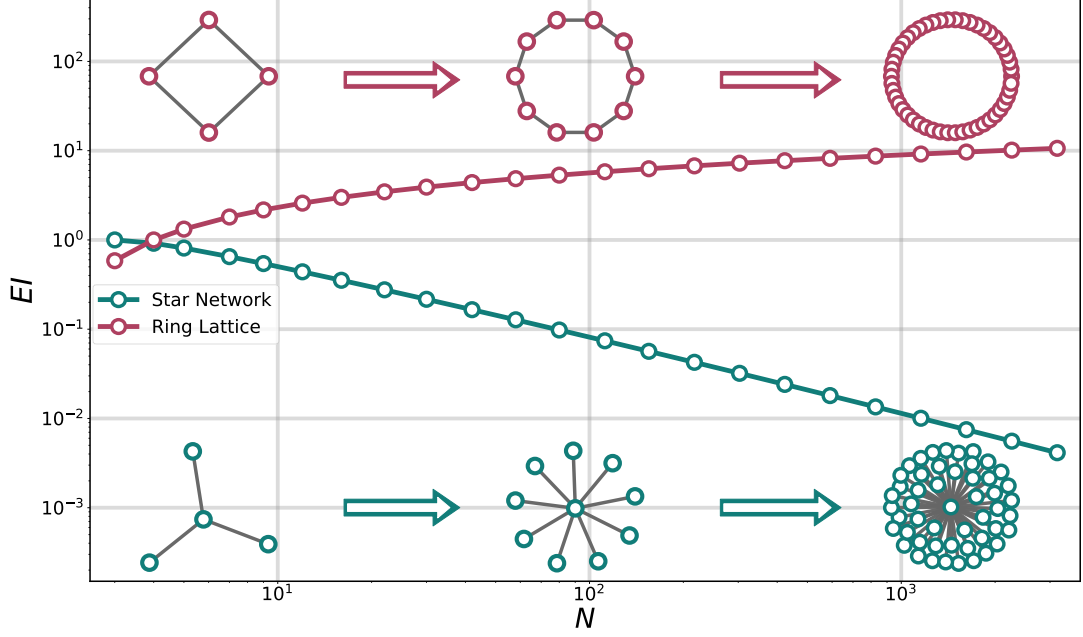

FIG. 8. **Effective information of stars and rings.** As the number of nodes in star networks increases, the  $EI$  approaches zero, while the  $EI$  of ring lattice networks grows logarithmically as the number of nodes increases.

a hub node, which itself has degree  $k_{hub} = N - 1$ . For star networks,  $EI$  approaches 0.0 as the number of nodes increases. This derivation is shown below.

$$EI_{star} = \frac{1}{N} \cdot \left[ \sum_{i=1}^{N-1} D_{KL} [W_{spoke}^{out} || \langle W_i^{out} \rangle] + D_{KL} [W_{hub}^{out} || \langle W_i^{out} \rangle] \right]$$

Every spoke has an out-weight vector  $W_i^{out}$  with  $N - 1$  elements of  $w_{ij} = 0.0$  and one with  $w_{ij} = 1.0$ . The single hub, however, has  $N - 1$  elements of  $w_{ij} = \frac{1}{N-1}$  with a single  $w_{ij} = 0.0$ . Similarly,  $\langle W_i^{out} \rangle$  consists of  $N - 1$  elements with values  $\frac{1}{N(N-1)}$ .

$$EI_{star} = \frac{1}{N} \cdot \left[ \sum_{i=1}^{N-1} D_{KL} \left[ \frac{1}{1} || \frac{N-1}{N} \right] + D_{KL} \left[ \frac{1}{N-1} || \frac{1}{N(N-1)} \right] \right] \quad (13)$$

Using the same techniques as above, this equation re-

duces to:

$$EI_{star} = \frac{1}{N} \cdot \left[ (N-1) \cdot \log_2 \left( \frac{\frac{1}{1}}{\frac{1}{N(N-1)}} \right) + \log_2 \left( \frac{\frac{1}{N-1}}{\frac{1}{N(N-1)}} \right) \right]$$

$$EI_{star} = \frac{N-1}{N} \cdot \log_2 \left( \frac{N}{N-1} \right) + \frac{1}{N} \cdot \log_2 (N)$$

$$EI_{star} = 0.0 \text{ as } \lim_{N \rightarrow \infty} \quad (14)$$

#### D. Network motifs as causal relationships

It is important to understand why certain motifs have more  $EI$  while others have less. In Fig. 9, we show the  $EI$  in 13 directed three-node network motifs. The connectivity of each motif drastically influences the  $EI$ . Motif 09—the directed cycle—is the motif with the highest  $EI$ . Intuitively, this fits with our definition of  $EI$ : the amount of certainty in the network (notably, each link in Motif 09, if taken to represent a causal relationship, is both necessary and sufficient). A random walker in this system has zero entropy (even if the direction of its path were reversed), whereas every other three-node motif does not contain that degree of certainty. Second, we see that Motif 04—a system with a “sink” node—has

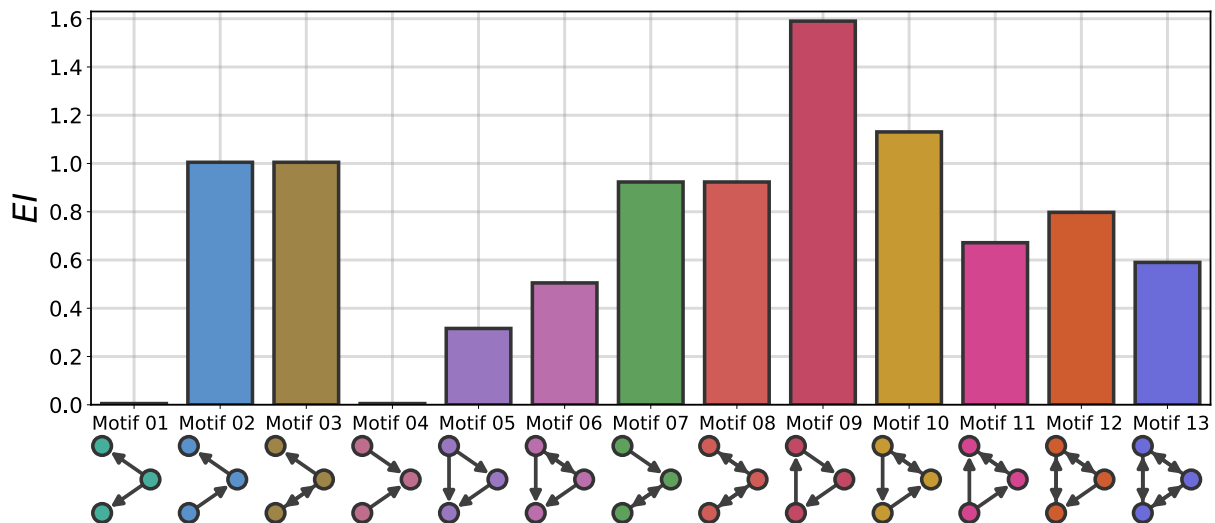

FIG. 9. **Effective Information of network motifs.** All directed 3-node subgraphs and their  $EI$ .

no  $EI$ , suggesting that a causal structure with that architecture is not informative, since all causes lead to the same effect. Similarly, because there are no outputs from two nodes in Motif 01, we see an  $EI$  value of zero.

#### E. Table of network data

In Table II, we report the name, domain, source, category, and description of each of the 84 networks used in our comparison of  $EI$  in real networks. These networks were selected primarily from the Konec database [23], with supplemental datasets added from NetworkRepository [24] when the Konec database lacked a sufficient number of datasets in a given category, since the two databases already significantly overlapped. In many cases, the interactions among nodes in these networks (i.e., their edges) can reasonably be interpreted as causal, directed influence, or dependencies such that the behavior of a node,  $v_i$ , at a given time can be thought to impact the behavior of its neighbors,  $v_j$ . By instituting relatively minimal requirements for selecting the above networks, we are able to assess the  $EI$  in a variety of complex systems across different domains. However, while we can measure the  $EI$  of any given network, the further interpretation of this  $EI$  depends also on what the nodes and edges of a network represent. In a case where the nodes represent states of a system, such as a Markov process, then the  $EI$  directly captures the information in the causal structure. In the case where the nodes represent merely dependencies or influence,  $EI$  can still be informative as a metric to compare different networks. In a network specifically composed of non-causal correlations, then  $EI$  is merely a structural property of the network's connectivity.

#### F. Examples of consistent macro-nodes

In Fig. 11 we display 15 different parameterizations of small networks grown under degree-based preferential attachment. Each plot shows to the inconsistency of the mapping from the microscale to the macroscale, in bits, which corresponds to the KL divergence of the distribution of random walkers on microscale nodes and the same distribution at the macroscale. Each of these networks are consistent after 1000 timesteps, with eight showing full consistency from the start. These 15 example networks also show the range of causal emergence values that is found in networks.

#### G. Emergent subgraphs

What sort of subgraph connectivity leads to causal emergence? To explore this we take two independent subgraphs, and couple them together while varying their size, moving from clique-like to bipartite connectivity. We then check to see if grouping those clusters into macro-nodes leads to causal emergence (Fig. 12). Specifically, we simulate many small unweighted, undirected networks ( $N = 100$ ) from a stochastic block model with two clusters, and we vary the probability of within-cluster edges (from 0.0 to 1.0) as well as the size-asymmetry of the two clusters (illustrated around the border of Fig. 12). In each simulation, we group the microscale network into two macro-nodes, each corresponding to one cluster. What we observe is a causal emergence landscape with several important characteristics (Fig. 12). First, in these networks we observe causal emergence when the fraction of within-cluster connections is either very high or very low (right and left sides of the heatmap in Fig. 12). These are the conditions in which there is a large

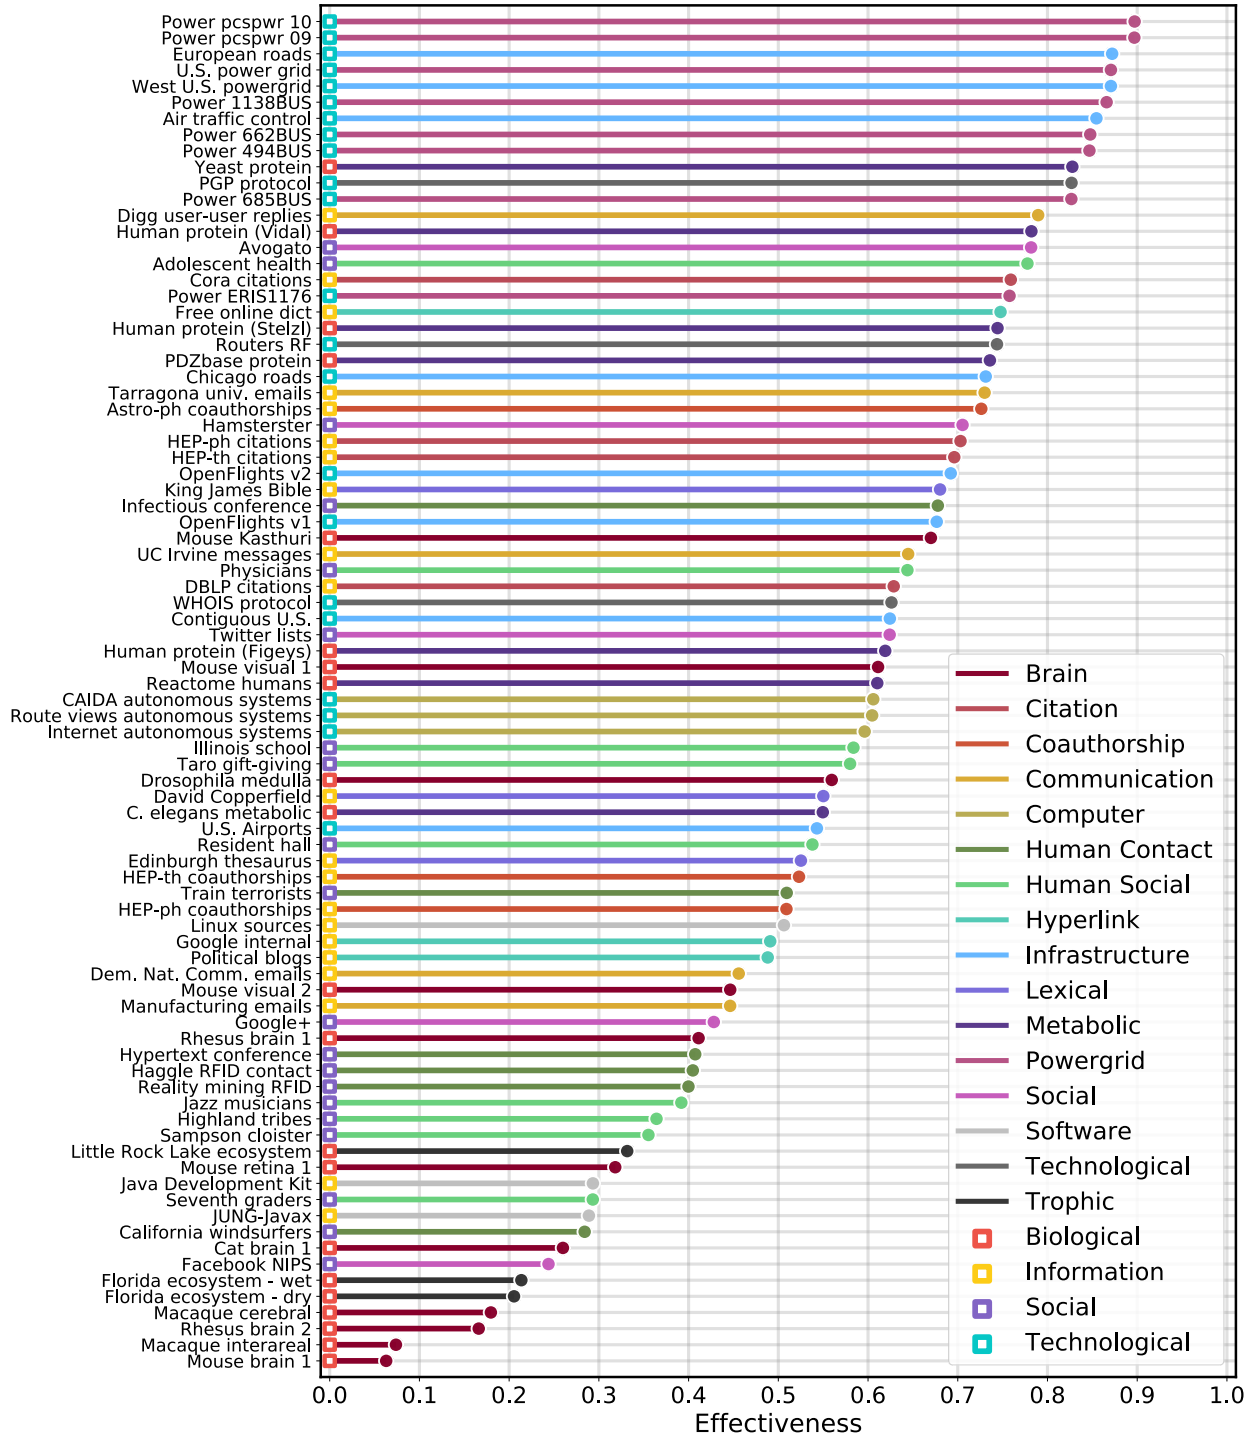

FIG. 10. **Effectiveness of real networks.** Full data behind the results summarized in Fig. 3, color-coded in two ways. First by 16 “Domains” (as in Table II), which corresponds to the classification of each network from its source repository (in this case, the Konect database [23] or the Network Repository [24]). The second categorization we report—those used in Fig. 3—involves grouping the Domains into four “Categories” (“Cat.” in Table II): Biological, Information, Social, and Technological. These correspond to the colored squares to the right of each network’s name.

amount of uncertainty, or noise, in that subgraph. Not only that, however, causal emergence is most likely when there is a size asymmetry between the two clusters, sug-

gesting that macroscales that maximize a network’s  $EI$  often do so by creating a more evenly distributed  $\langle W_i^{out} \rangle$ . In general, however, the space of subgraphs leans toward

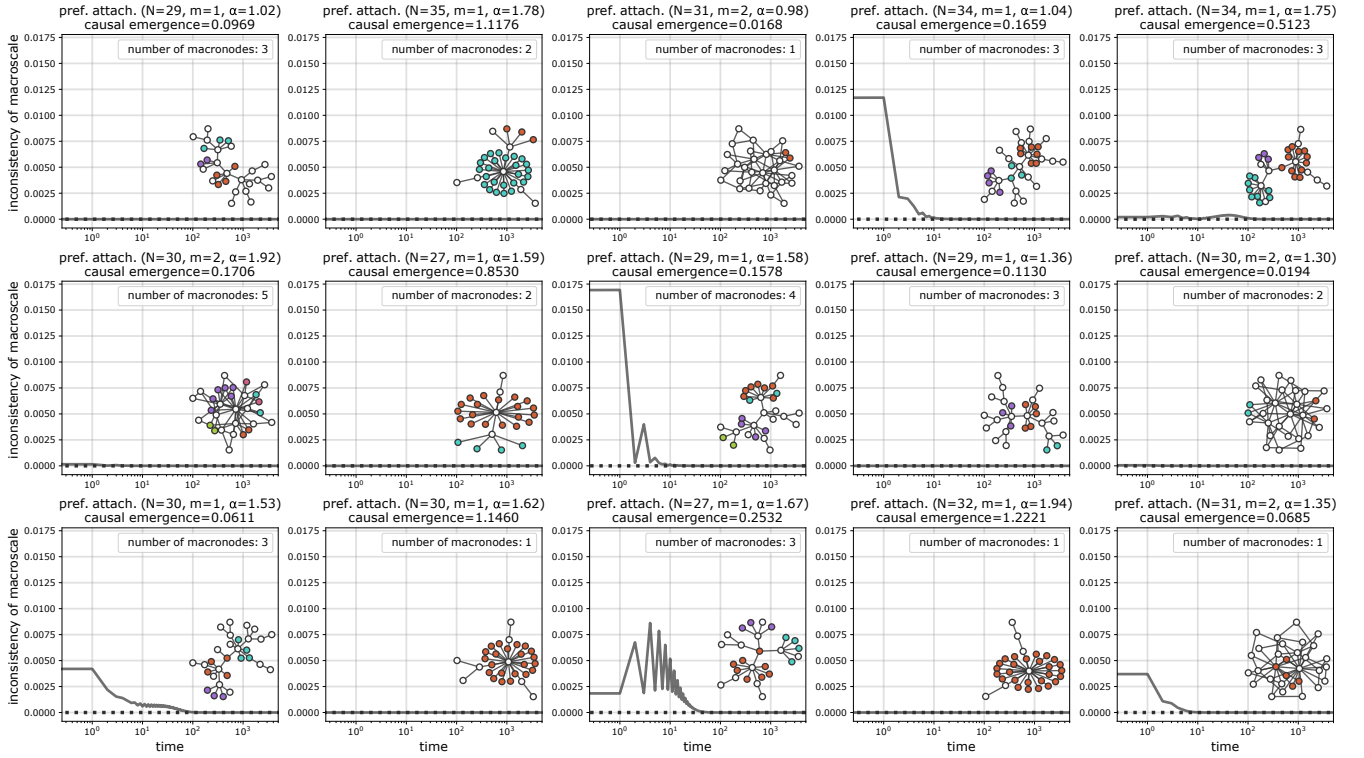

FIG. 11. **Typically minimal inconsistency of higher-order macro-nodes.** Each inset is of the microscale network, where each node's color corresponds to the  $\mu/\pi$  macro-node it has been mapped to following one instance of the greedy algorithm detailed in the Materials & Methods section. White nodes indicate a micro-node that was not grouped into a new macro-node. Inconsistency is plotted over time.

causal reduction (a loss of  $EI$  after grouping), which fits with the success of reduction historically and explains why researchers and modelers should generally be biased toward reduction.

In cases of complete noise, with no asymmetries or differences between intra- or inter-connectivity between subgraphs, we should expect causal emergence to be impossible. Indeed, this is what we see for many parameterizations of Erdős-Rényi networks of various sizes (Fig. 13). This result follows from insights in Fig. 1a, where

the  $EI$  of ER networks converges to a fixed value of  $-\log_2(p)$  as the size of the network increases. Here, we observe some causal emergence in ER networks but only when the networks are very small. Importantly, the amount of causal emergence is also very small, especially relative to the causal emergence in networks with preferential attachment. This further suggests that causal emergence moves the existent structure of the network into focus by examining the network at a certain scale, rather than creating that structure from nothing.

| Network name                   | Domain         | Source | Cat. | Description                                        |
|--------------------------------|----------------|--------|------|----------------------------------------------------|
| HEP-th citations               | Citation       | Konect | Inf. | high-energy physics (HEP) citations - theory       |
| HEP-ph citations               | Citation       | Konect | Inf. | HEP citations - phenomenology                      |
| Cora citations                 | Citation       | Konect | Inf. | citations from the Cora database                   |
| DBLP citations                 | Citation       | Konect | Inf. | database of scientific publications                |
| Astro-ph coauthorships         | Coauthorship   | Konect | Inf. | coauthors on astronomy arXiv papers                |
| HEP-th coauthorships           | Coauthorship   | Konect | Inf. | coauthors on HEP-theory arXiv papers               |
| HEP-ph coauthorships           | Coauthorship   | Konect | Inf. | coauthors on HEP-phenomenology arXiv papers        |
| Tarragona univ. emails         | Communication  | Konect | Soc. | emails from the University Rovira i Virgili        |
| Dem. Nat. Comm. emails         | Communication  | Konect | Soc. | 2016 Democratic National Committee email leak      |
| Digg user-user replies         | Communication  | Konect | Soc. | reply network from the social news website Digg    |
| UC Irvine messages             | Communication  | Konect | Soc. | messages between students at UC Irvine             |
| Manufacturing emails           | Communication  | Konect | Soc. | internal emails between employees at a company     |
| CAIDA autonomous systems       | Computer       | Konect | Tec. | autonomous systems network from CAIDA, 2007        |
| Route views autonomous systems | Computer       | Konect | Tec. | autonomous systems network                         |
| Internet autonomous systems    | Computer       | Konect | Tec. | connected IP routing                               |
| Haggle RFID contact            | Human Contact  | Konect | Soc. | human proximity, via carried wireless devices      |
| Reality mining RFID            | Human Contact  | Konect | Soc. | RFID data from 100 MIT students' interactions      |
| California windsurfers         | Human Contact  | Konect | Soc. | contacts between windsurfers California, 1986      |
| Train terrorists               | Human Contact  | Konect | Soc. | contacts between Madrid train bombing suspects     |
| Hypertext conference           | Human Contact  | Konect | Soc. | face-to-face contacts at the ACM Hypertext 2009    |
| Infectious conference          | Human Contact  | Konect | Soc. | face-to-face contacts at INFECTIOUS, 2009          |
| Jazz musicians                 | Human Social   | Konect | Soc. | collaboration network between Jazz musicians       |
| Adolescent health              | Human Social   | Konect | Soc. | surveyed students list their best friends          |
| Physicians                     | Human Social   | Konect | Soc. | innovation spread network among 246 physicians     |
| Resident hall                  | Human Social   | Konect | Soc. | friendship ratings between students in a dorm      |
| Sampson cloister               | Human Social   | Konect | Soc. | relations between monks in a monastery             |
| Seventh graders                | Human Social   | Konect | Soc. | proximity ratings between seventh grade students   |
| Taro gift-giving               | Human Social   | Konect | Soc. | gift-givings (taro) between households             |
| Dutch college                  | Human Social   | Konect | Soc. | friendship ratings between university freshmen     |
| Highland tribes                | Human Social   | Konect | Soc. | tribes in the Gahuku-Gama alliance structure       |
| Illinois school                | Human Social   | Konect | Soc. | friendships between boys at an Illinois highschool |
| Free online dict.              | Hyperlink      | Konect | Inf. | cross references in Free Online Dict. of Computing |
| Political blogs                | Hyperlink      | Konect | Inf. | hyperlinks between blogs, 2004 US election         |
| Google internal                | Hyperlink      | Konect | Inf. | hyperlink network from pages within Google.com     |
| Air traffic control            | Infrastructure | Konect | Tec. | USA's FAA, Preferred Routes Database               |
| OpenFlights v1                 | Infrastructure | Konect | Tec. | flight network between airports, OpenFlights.org   |
| OpenFlights v2                 | Infrastructure | Konect | Tec. | flight network between airports, OpenFlights.org   |
| Contiguous U.S.                | Infrastructure | Konect | Tec. | 48 contiguous states and D.C. of the U.S.          |
| European roads                 | Infrastructure | Konect | Tec. | international E-road network, mainly in Europe     |
| Chicago roads                  | Infrastructure | Konect | Tec. | road transportation network of the Chicago region  |
| West U.S. powergrid            | Infrastructure | Konect | Tec. | power grid of the Western U.S.                     |
| U.S. Airports                  | Infrastructure | Konect | Tec. | flights between US airports in 2010                |
| David Copperfield              | Lexical        | Konect | Inf. | network of common noun and adjective adjacencies   |
| Edinburgh thesaurus            | Lexical        | Konect | Inf. | word association network, collected experimentally |
| King James Bible               | Lexical        | Konect | Inf. | co-occurrence between nouns in the Bible           |

TABLE II. **Network datasets.** Continued on the following page.

| Network name               | Domain        | Source            | Cat. | Description                                          |
|----------------------------|---------------|-------------------|------|------------------------------------------------------|
| C. elegans metabolic       | Metabolic     | Konect            | Bio. | metabolic network of the <i>C. elegans</i> roundworm |
| Human protein (Figeys)     | Metabolic     | Konect            | Bio. | interactions network of proteins in Humans           |
| PDZbase protein            | Metabolic     | Konect            | Bio. | protein-protein interactions from PDZBase            |
| Human protein (Stelzl)     | Metabolic     | Konect            | Bio. | interactions network of proteins in Humans           |
| Human protein (Vidal)      | Metabolic     | Konect            | Bio. | proteome-scale map of Human protein interactions     |
| Yeast protein              | Metabolic     | Konect            | Bio. | protein interactions contained in yeast              |
| Reactome humans            | Metabolic     | Konect            | Bio. | protein interactions, from the Reactome project      |
| Avogato                    | Social        | Konect            | Soc. | trust network for users of Advogato                  |
| Google+                    | Social        | Konect            | Soc. | Google+ user-user connections                        |
| Hamsterster                | Social        | Konect            | Soc. | friendships between users of hamsterster.com         |
| Twitter lists              | Social        | Konect            | Soc. | Twitter user-user following network                  |
| Facebook NIPS              | Social        | Konect            | Soc. | Facebook user-user friendship network                |
| Linux dependency           | Software      | Konect            | Inf. | Linux source code dependency network                 |
| J.D.K. dependency          | Software      | Konect            | Inf. | software class dependencies, JDK 1.6.0.7             |
| JUNG/javax dependency      | Software      | Konect            | Inf. | software class dependencies, JUNG 2.0.1 & javax      |
| Florida ecosystem - dry    | Trophic       | Konect            | Bio. | food web in the Florida wetlands (dry season)        |
| Florida ecosystem - wet    | Trophic       | Konect            | Bio. | food web in the Florida wetlands (wet season)        |
| Little Rock Lake ecosystem | Trophic       | Konect            | Bio. | food web of Little Rock Lake, Wisconsin              |
| WHOIS protocol             | Technological | NetworkRepository | Tec. | dataset of internet routing registries               |
| PGP protocol               | Technological | NetworkRepository | Tec. | trust protocol of private keys of internet users     |
| Routers RF                 | Technological | NetworkRepository | Tec. | traceroute network between routers via Rocketfuel    |
| Cat brain 1                | Brain         | NetworkRepository | Bio. | fiber tracts between brain regions of a cat          |
| Drosophila medulla         | Brain         | NetworkRepository | Bio. | neuronal network from the medulla of a fly           |
| Rhesus brain 1             | Brain         | NetworkRepository | Bio. | collation of tract tracing studies in primates       |
| Rhesus brain 2             | Brain         | NetworkRepository | Bio. | inter-areal cortical networks from a primate         |
| Macaque cerebral           | Brain         | NetworkRepository | Bio. | connections between cerebral cortex of a primate     |
| Macaque interareal         | Brain         | NetworkRepository | Bio. | inter-areal cortical networks from a primate         |
| Mouse Kasthuri             | Brain         | NetworkRepository | Bio. | neuronal network of a mouse                          |
| Mouse brain 1              | Brain         | NetworkRepository | Bio. | calcium imaging of neuronal networks in a mouse      |
| Mouse retina 1             | Brain         | NetworkRepository | Bio. | electron microscopy of neurons in mouse retina       |
| Mouse visual 1             | Brain         | NetworkRepository | Bio. | electron microscopy of visual cortex of a mouse      |
| Mouse visual 2             | Brain         | NetworkRepository | Bio. | electron microscopy of visual cortex of a mouse      |
| Power 1138BUS              | Powergrid     | NetworkRepository | Tec. | power system admittance, via Harwell-Boeing          |
| Power 494BUS               | Powergrid     | NetworkRepository | Tec. | power system admittance, via Harwell-Boeing          |
| Power 662BUS               | Powergrid     | NetworkRepository | Tec. | power system admittance, via Harwell-Boeing          |
| Power 685BUS               | Powergrid     | NetworkRepository | Tec. | power system admittance, via Harwell-Boeing          |
| U.S. power grid            | Powergrid     | NetworkRepository | Tec. | electricity / power transmission network in the U.S. |
| Power pcspwr 09            | Powergrid     | NetworkRepository | Tec. | BCSPWR09 powergrid data via Harwell-Boeing           |
| Power pcspwr 10            | Powergrid     | NetworkRepository | Tec. | BCSPWR10 powergrid data via Harwell-Boeing           |
| Power ERIS1176             | Powergrid     | NetworkRepository | Tec. | powergrid data via Erisman, 1973                     |

TABLE II. Network datasets (continued).

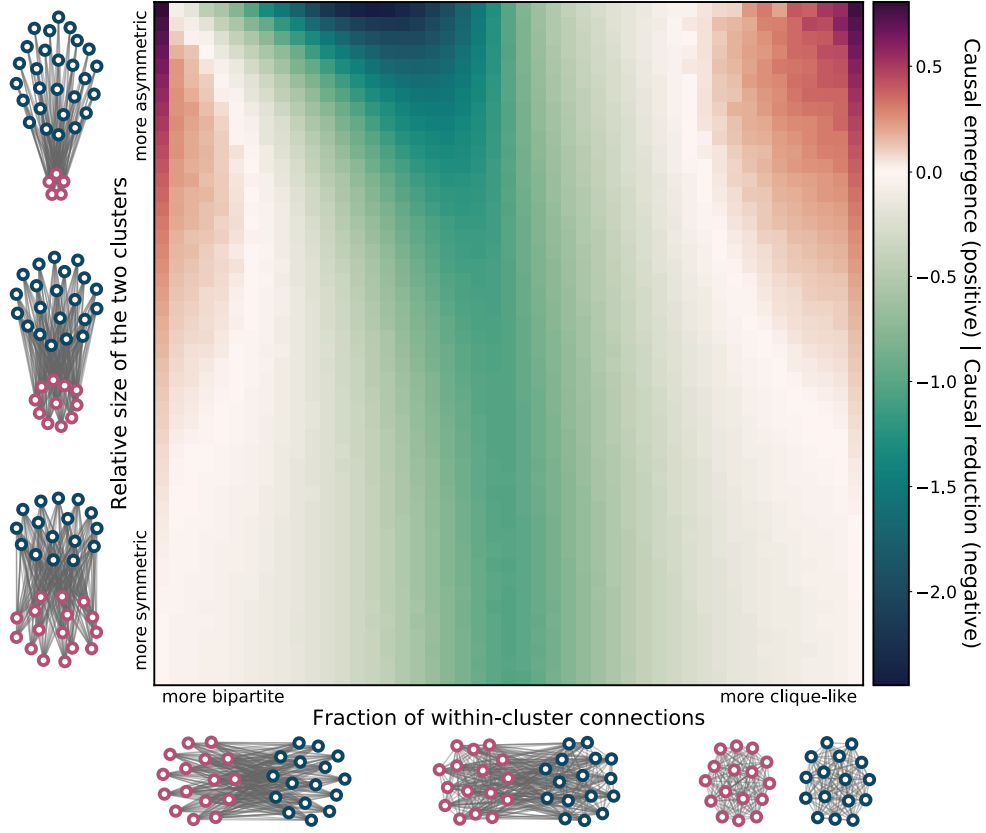

FIG. 12. **Causal emergence in a simplified stochastic block model.** Schematic showing the role of the two relevant parameters—the fraction of nodes in each community (ranging from  $r = 0.50$  to  $r < 1.0$ ) and the fraction of within-cluster connections (ranging from  $p = 0.0$ , a fully bipartite network, to  $p = 1.0$ —two disconnected cliques). By repeatedly simulating networks under various combinations of parameters ( $N = 100$  with 100 simulations per combination of parameters), we see combinations that are more apt to produce networks with causal emergence.

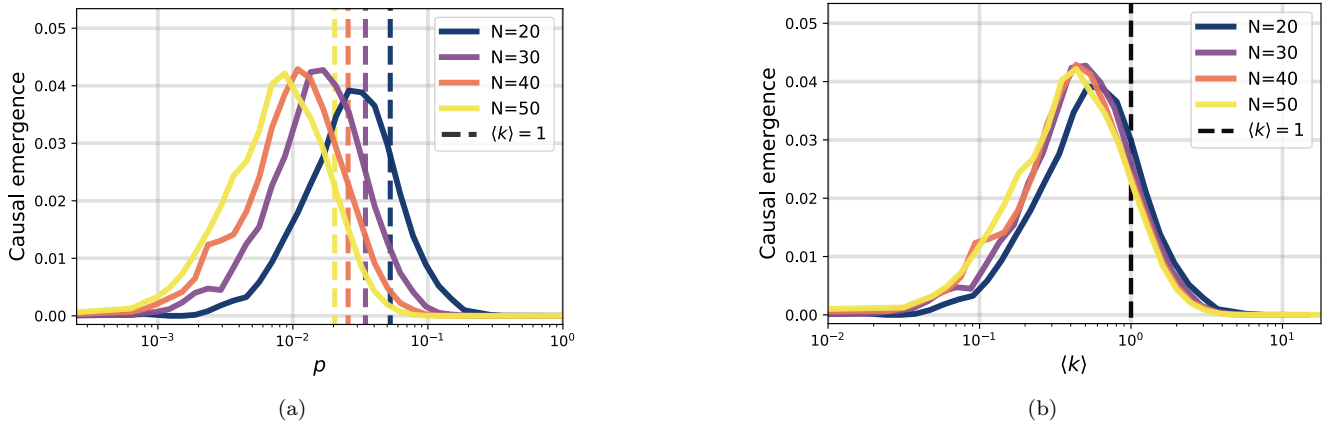

FIG. 13. **Causal emergence in Erdős-Rényi networks.** (A) As the edge density,  $p$ , of ER networks increases and  $N$  is held constant, the amount of causal emergence quickly drops to zero. (B) This drop occurs well before  $pN = \langle k \rangle = 1$ , meaning the algorithm for uncovering causal emergence is only grouping small, disconnected, tree-like subgraphs that have yet to form into a giant component. Of note here is the low magnitude of causal emergence even in cases where the random network is not a single large component, and the vanishing of causal emergence after it is.
