# Supplementary material for: The Emergence of Informative Higher Scales in Complex Networks
Source: Hindawi journal article supplement (doi:10.1155/2020/8932526), 2020-04-04
Supplement: f1 [file 8932526.f1.zip › 8932526.f1/CausalEmergence_SBM_mean_N100c_wNets.pdf]

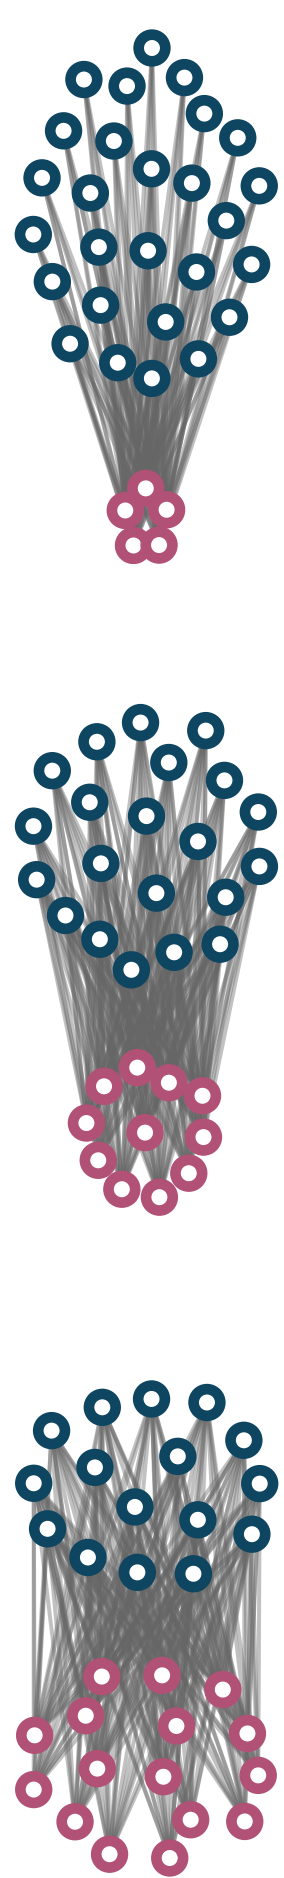

Relative size of the two clusters

more symmetric

more asymmetric

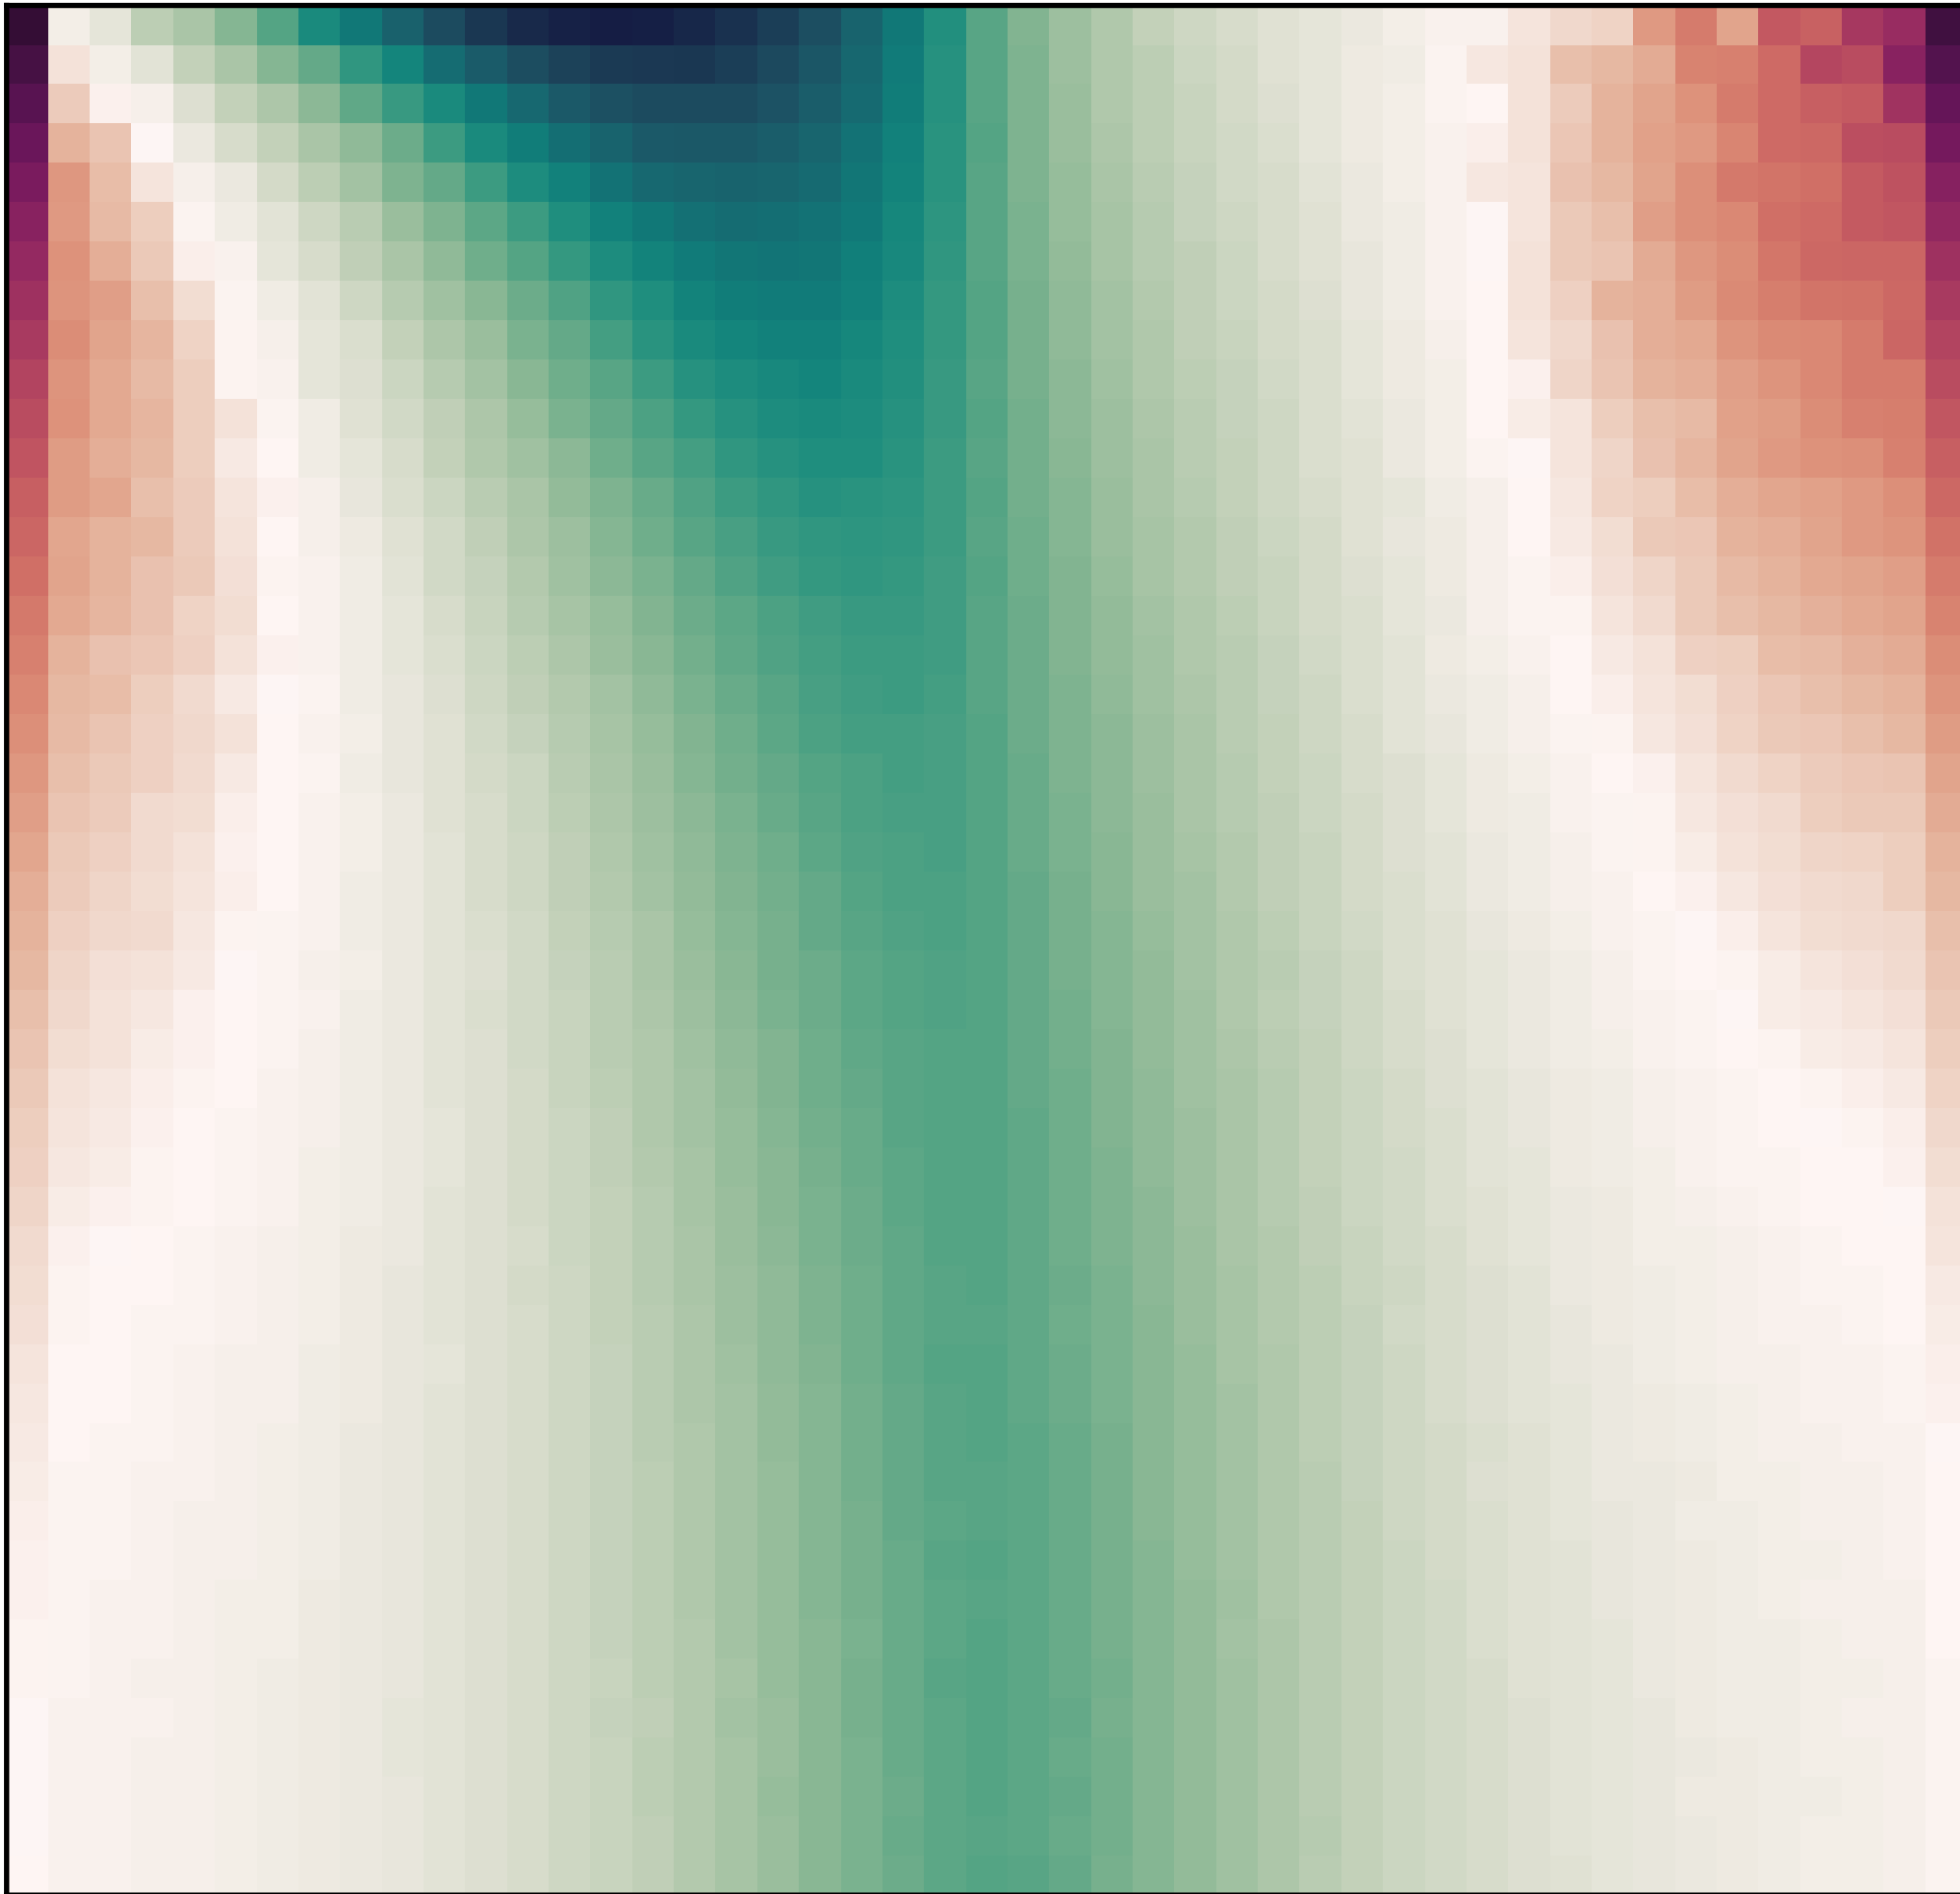

more bipartite

more clique-like

Fraction of within-cluster connections

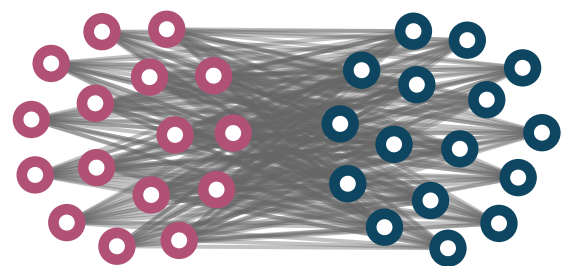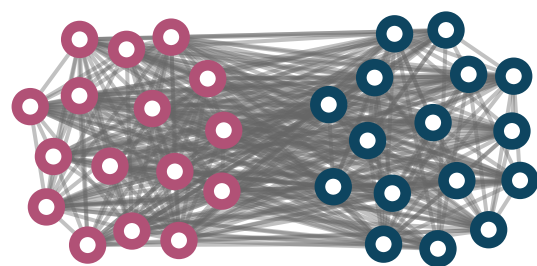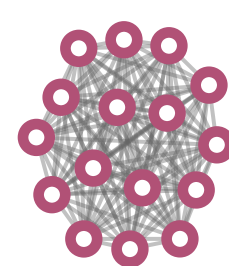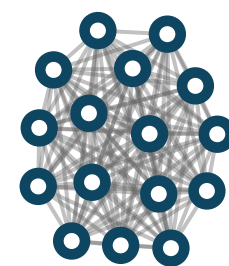

Causal emergence (positive) | Causal reduction (negative)

0.5

0.0

-0.5

-1.0

-1.5

-2.0
