# Supplementary material for: The Emergence of Informative Higher Scales in Complex Networks
Source: Hindawi journal article supplement (doi:10.1155/2020/8932526), 2020-04-04
Supplement: f1 [file 8932526.f1.zip › 8932526.f1/EffectiveInfoCalculation_Network_TPM.pdf]

|     |     | $t + 1$ |      |      |      |      |     |                             |
|-----|-----|---------|------|------|------|------|-----|-----------------------------|
|     |     | $A$     | $B$  | $C$  | $D$  | $E$  |     |                             |
| $t$ | $A$ | 0.00    | 0.00 | 0.00 | 0.50 | 0.50 | $=$ | $W_A^{out}$                 |
|     | $B$ | 0.33    | 0.00 | 0.33 | 0.33 | 0.00 | $=$ | $W_B^{out}$                 |
|     | $C$ | 0.00    | 0.50 | 0.00 | 0.50 | 0.00 | $=$ | $W_C^{out}$                 |
|     | $D$ | 0.00    | 0.00 | 0.00 | 0.00 | 1.00 | $=$ | $W_D^{out}$                 |
|     | $E$ | 0.50    | 0.00 | 0.00 | 0.50 | 0.00 | $=$ | $W_E^{out}$                 |
|     |     | 0.83    | 0.50 | 0.33 | 1.83 | 1.50 | $=$ | $\sum_{i=1}^N w_{ij}$       |
|     |     | 0.17    | 0.10 | 0.07 | 0.37 | 0.30 | $=$ | $\langle W_i^{out} \rangle$ |
