# Supplementary material for: The Emergence of Informative Higher Scales in Complex Networks
Source: Hindawi journal article supplement (doi:10.1155/2020/8932526), 2020-04-04
Supplement: f1 [file 8932526.f1.zip › 8932526.f1/supplemental_information - Hoel Klein.tex]

\section{Supplementary Materials}

\subsection{\label{sec:SI_keyTerms}Table of key terms}

A table of key terms can be found in Table \ref{table_of_terms}.

\begin{table*}[t]
    \renewcommand*{\arraystretch}{1.75}
    \centering
    \begin{tabular}{| p{3.75cm} | p{6.25cm} | p{5.5cm} |}
        \hline
        \textbf{Term} & \textbf{Description} & \textbf{Notation} \\
        \hline \hline
        Network size & the number of nodes in the network & $ N $ \\ \hline
        Out-weight vector\newline($v_i$) & a vector of probabilities $w_{ij}$ that a random walker on node $v_i$ will transition to $v_j$ & $ W^{out}_{i} = \{w_{i1}, w_{i2},,... w_{ij}, ... w_{iN}\}$ \\ \hline
        Effective information\newline (network) & the total information in a causal structure, in bits & $EI = {{H}(\langle W^{out}_{i}\rangle)} - {\langle {H}(W^{out}_{i}) \rangle}$ \\ \hline
        Determinism\newline ($v_i$) & how certain about next steps is a random walker on $v_i$ & $\text{det}_{i} = \log_2(N) - H(W^{out}_{i})$ \\ \hline
        Degeneracy\newline (network) & how distributed the certainty is over the nodes of the network & $\text{degeneracy} = \log_2(N) - H(\langle W^{out}_{i}\rangle)$ \\ \hline
        Effect information\newline ($v_i$) & the contribution of each node $v_i$ to the network's $EI$ & $EI_{i} = \text{D}_{_{KL}}[ W^{out}_{i} || \langle W^{out}_{i}\rangle ]$ \\ \hline
        Micro-nodes in a\newline macro-node & the set of micro-nodes grouped into a macro-node in the new network, $G_M$ & $S = \{v_i, v_j, ...\}$, of length $N_S$ \\ \hline
        Macro-node out-weights & the out-weights from macro-node, $\mu$, to its neighbors & $W_{\mu}^{out} = \displaystyle\sum_{i \in S} W_i^{out} \cdot \Big(\dfrac{1}{N_S}\Big)$ \\ \hline
        Macro-node out-weights\newline given input weights & the out-weights from macro-node, $\mu$, to its neighbors, \textit{conditioned} on in-weights to the micro-nodes, $v_i \in S$ & \vspace{0.001cm} $W_{\mu|j}^{out} = \displaystyle\sum_{i \in S} W_i^{out} \cdot \Big(\dfrac{\sum_{j->i} w_{ji}}{\sum_{j->k \in S} w_{jk}}\Big)$ \\ \hline
        Macro-node out-weights\newline given the stationary\newline distribution & the out-weights from macro-node, $\mu$, to its neighbors, conditioned on the stationary probabilities, $\pi_i$, of micro-nodes, $v_i \in S$ & \vspace{0.01cm} $W_{\mu|\pi}^{out} = \displaystyle\sum_{i \in S} W_i^{out} \cdot \Big(\dfrac{\pi_i}{\sum_{k\in S} \pi_k}\Big)$ \\ \hline
    \end{tabular}
    \caption{\textbf{Table of key terms}. Quantities needed in order to calculate $EI$ and create consistent macro-nodes.}
    \label{table_of_terms}
\end{table*}


\subsection{\label{sec:ei_calc}Effective information calculation}

Mathematically, $EI$ has been expressed in a number of previous ways. The first was as the mutual information between two subsets of a system (while injecting noise into one), originally proposed as a step in the calculation of integrated information between neuron-like elements \cite{Tononi2004, Balduzzi2009}. More recently, it was pointed out that in general an intervention distribution, $I_D$, defined as a probability distribution over the $do(x)$ operator (as in \cite{Pearl2000}), creates some resultant effect distribution, $E_D$. Then the $EI$ is the mutual information, $I(I_D; E_D)$, between the two, when the interventions are done like a randomized trial to reveal the dependencies (i.e., at maximum entropy \cite{Fisher1936, Hoel2017WhenTerritory}). 

\begin{figure*}[t!]
    \centering
    \subfloat[\label{fig:example_network}]{
        \includegraphics[width=0.95\columnwidth]{figures/EffectiveInfoCalculation_Network_TPM.pdf}
    }\hfill
    \subfloat[\label{fig:example_kld}]{
        \includegraphics[width=\textwidth]{figures/EffectiveInfoCalculation_KLD.pdf}
    }
    \caption{\textbf{Illustration of the calculation of effective information.} (\textbf{A}) The adjacency matrix of a network with 1.158 bits of $EI$ (calculation shown in (\textbf{B})). The rows correspond to $W^{out}_{i}$, a vector of probabilities that a random walker on node $v_i$ at time $t$ transitions to $v_j$ in the following time step, $t+1$. $\langle W^{out}_{i}\rangle$ represents the (normalized) input weight distribution of the network, that is, the probabilities that a random walker will arrive at a given node $v_j$ at $t+1$, after a uniform introduction of random walkers into the network at $t$. (\textbf{B}) Each node's contribution to the $EI$ ($EI_i$) is the KL divergence of its $W^{out}_{i}$ vector from the network's $\langle W^{out}_{i}\rangle$, known as the \textit{effect information}.}
    \label{fig:example_calc}
\end{figure*}

In order to calculate the total information contained in the causal relationships of a system, $EI$ is applied to the system as a whole \cite{Hoel2013QuantifyingMicro}. There, $EI$ was defined over the set of all states of a system and its state transitions. Because the adjacency matrix of a network can be cast as a transition matrix (as in Fig. \ref{fig:example_network}), the $EI$ of a network can be expressed as:
\begin{equation}\label{eq:dkl_ei}
    EI = \dfrac{1}{N}   \sum_{i=1}^N \text{D}_{_{KL}}[W^{out}_{i} || \langle W^{out}_{i} \rangle] \tag{7}
\end{equation}

\noindent where $EI$ is the average of the \textit{effect information}, $EI_i$, of each node (see Table \ref{table_of_terms} and Fig. \ref{fig:example_kld}). This is equivalent to our derivation of $EI$ from first principles in Equation \ref{eq:ei}, since:
\begin{align*}
    EI &= \dfrac{1}{N} \sum_{i=1}^N \text{D}_{_{KL}}[W^{out}_{i} || {\langle W^{out}_{i}\rangle}] \\
    &= \dfrac{1}{N} \sum_{i=1}^{N} \sum_{j=1}^{N} w_{ij}\log_2\bigg(\dfrac{w_{ij}}{W_{j}}\bigg) \nonumber \\
    &= \dfrac{1}{N}  \sum_{i=1}^{N}\bigg( \sum_{j=1}^{N} w_{ij}\log_2(w_{ij}) - \sum_{j=1}^{N} w_{ij}\log_2(W_{j})\bigg) \nonumber \\
    &= \dfrac{1}{N}  \sum_{i=1}^{N} \sum_{j=1}^{N} w_{ij}\log_2\big(w_{ij}\big) - \dfrac{1}{N}  \sum_{i=1}^{N} \sum_{j=1}^{N} w_{ij}\log_2\big(W_{j}\big) \tag{8}\label{eq:decompose_ei}
\end{align*}

Note that for a given node, $v_i$, the term in the first summation in Equation \ref{eq:decompose_ei} above, $\displaystyle\sum_{j=1}^{N} w_{ij}\log_2\big(w_{ij}\big)$, is equivalent to the negative entropy of the out-weights from $v_i$, $-H(W_i^{out})$. Also note that $W_j$, the \textit{j}th element in the $\langle W^{out}_{i}\rangle$ vector, is the normalized sum of the incoming weights to $v_j$ from its neighbors, $v_i$, such that $W_j=\dfrac{1}{N} \displaystyle\sum_{i=1}^N w_{ij}$. We substitute these two terms into Equation \ref{eq:decompose_ei} above such that: 
\begin{equation*}
    EI = \dfrac{1}{N}   \sum_{i=1}^{N}-H(W_i^{out}) -  \sum_{j=1}^{N} W_j\log_2\big(W_{j}\big) \tag{9}
\end{equation*}

This is equivalent to the formulation of $EI$ from Equation \ref{eq:ei}, since $H(\langle W^{out}_{i}\rangle) = -\displaystyle\sum_{j=1}^{N} W_j\log_2(W_{j})$:
\begin{equation*}
    EI = H(\langle W^{out}_{i}\rangle) -\langle H(W_i^{out}) \rangle \tag{1}
\end{equation*}

In the  derivations of SM \ref{sec:SI_derivations} we adopt the relative entropy formulation of $EI$ from Equation \ref{eq:dkl_ei} for ease of derivation. For a visual intuition behind the calculations involved in this formulation of $EI$, see how the network in Fig. \ref{fig:example_network} is used to calculate its $EI$ (Fig. \ref{fig:example_kld}), by calculating the mean effect information, $EI_i$, of nodes in the network.


\subsection{\label{sec:SI_derivations}Deriving the effective information of common network structures} 

Here we inspect the $EI$ for iconic graphical structures, and in doing so, we see several interesting relationships between a network structure and its $EI$. First, however, we will introduce key terminology and assumptions. 

Let $\langle k \rangle$ be the average degree of a network, $G$, and each node, $v_i$, has degree, $k_i$. In directed graphs each $v_i$ has an in-degree, $k^{in}_{i}$, and an out-degree, $k^{out}_{i}$. These correspond to the number of edges leading in to $v_i$ and edges going out from $v_i$. The total number of edges in $G$ is represented by $E$. In undirected Erd\H{o}s-R\'enyi (ER) networks, the total number of edges is given by $E = p\frac{N(N-1)}{2}$, where $p$ represents the probability that any two nodes, $v_i$ and $v_j$, will be connected. In the following subsections, we derive the $EI$ of several prototypical network structures, from random graphs to ring lattices to star networks. Note that for the following derivations we proceed from the relative entropy formalism from SM \ref{sec:ei_calc}, and note that therefore $N$ is the number of nodes with the output, $N=N_{out}$.

\begin{figure*}[t]
    \centering
    \includegraphics[width=0.8\textwidth]{figures/EffectiveInformation_Compare_StarLine.pdf}
    \caption{\textbf{Effective information of stars and rings.} As the number of nodes in star networks increases, the $EI$ approaches zero, while the $EI$ of ring lattice networks grows logarithmically as the number of nodes increases.}
    \label{fig:star_ring}
\end{figure*}


\subsubsection{\label{sec:SI_derivations_ER}Derivation: effective information of ER networks}

In Erd\H{o}s-R\'enyi networks, $EI$ does not depend on the number of nodes in the network, $N$. Instead, the network's $EI$ reaches its maximum at $-\log_2(p)$. This is because in ER networks, each node is expected to connect to $\langle k \rangle = pN$ neighboring nodes, such that every value in $W^{out}_{i} = \frac{1}{\langle k \rangle}$ and every value in $ \langle W^{out}_{i}\rangle = \frac{\langle k \rangle}{N\langle k \rangle}=\frac{1}{N}$, which can be represented as:
\begin{align*}
    EI_{ER} &= \dfrac{1}{N}   \sum_{i}^{N} \text{D}_{_{KL}}\Big[\big(\dfrac{1}{\langle k \rangle},\dfrac{1}{\langle k \rangle}, ...\big) || \big(\dfrac{1}{N}, \dfrac{1}{N}, ...\big)\Big] 
\end{align*}

Each node in an ER network is expected to be identical to all other nodes in the network, and calculating the expected \textit{effect information}, $EI_i$, is equivalent to calculating the network's $EI$. As such, we observe: 
\begin{align*}
    EI_{i} &=\sum_{j=1}^{k_i} \frac{1}{\langle k \rangle} \cdot \log_{2}\Bigg(\dfrac{\dfrac{1}{\langle k \rangle}}{\dfrac{1}{N}}\Bigg) = \log_{2} \Big(\dfrac{N}{pN}\Big) \\
    EI_{ER} &=\dfrac{1}{N} \cdot  \sum_{i}^{N} -\log_{2}(p) = -\log_{2}(p) \tag{10}
\end{align*}


\subsubsection{\label{sec:SI_derivations_ring}Derivation: effective information of ring-lattice and star networks}

Here, we compare two classes of networks with the same average degree---ring lattice networks and star, or hub-and-spoke, graphs (see Fig. \ref{fig:star_ring}). In each network, we assume an average degree $\langle k \rangle = 2d$, with $d$ being the dimension. The $EI$ of star network, $EI_{star}$, approaches $0.0$ as $N$ gets larger, while the $EI$ of ring lattices approaches $\log_2(N) - \log_2(2d)$. These derivations are shown below, first for the \textit{d}-dimensional ring lattice, $EI_{d}$.

As every node in a ring lattice is connected to its $2d$ neighbors, each element of $\langle W^{out}_{i}\rangle$ is $\frac{1}{2d}$ and each element of $W^{in}$ is $\frac{2d}{2d\times N} = \frac{1}{N}$.
\begin{align}
    EI_{d} &= \dfrac{1}{N} \cdot  \sum_{i} \text{D}_{_{KL}}\Big[\big(\dfrac{1}{2d}, \dfrac{1}{2d}, ...\big) || \big(\dfrac{1}{N}, \dfrac{1}{N}, ...\big) \Big] \tag{11}
\end{align}

Each node in a \textit{d}-dimensional ring lattice is expected to be identical, so calculating the expected \textit{effect information}, $EI_i$, is equivalent to calculating the network's $EI$. As such, we observe:
\begin{align}
    EI_{i} &=  \sum_{j=1}^{2d} \frac{1}{2d} \cdot \log_{2}\Bigg(\dfrac{\dfrac{1}{2d}}{\dfrac{1}{N}}\Bigg) =  \log_{2}\Bigg(\dfrac{N}{2d}\Bigg) \nonumber \\
    EI_{d} &= \log_{2}(N) - \log_{2}(2d) \tag{12}
\end{align}

Note: the $EI$ of ring lattice networks reduces to simply the \textit{determinism} of the network. The $EI$ of ring lattice networks scale logarithmically with the size of the network, which is contrasted by the behavior of $EI$ in star networks. Star networks have a hub-and-spoke structure, where $N-1$ nodes of degree $k_{spoke}=1$ are connected a hub node, which itself has degree $k_{hub}=N-1$. For star networks, $EI$ approaches $0.0$ as the number of nodes increases. This derivation is shown below.
\begin{align*}
    EI_{star} = \dfrac{1}{N}\cdot\Bigg[ \sum_{i=1}^{N-1} &\text{D}_{_{KL}}\Big[W^{out}_{spoke} || \langle W^{out}_{i}\rangle \Big] +\nonumber\\
    &\text{D}_{_{KL}}\Big[W^{out}_{hub} || \langle W^{out}_{i}\rangle \Big]\Bigg]
\end{align*}

Every spoke has an out-weight vector $W^{out}_{i}$ with $N-1$ elements of $w_{ij}=0.0$ and one with $w_{ij} = 1.0$. The single hub, however, has $N-1$ elements of $w_{ij}=\frac{1}{N-1}$ with a single $w_{ij}=0.0$. Similarly, $\langle W^{out}_{i}\rangle$ consists of $N-1$ elements with values $\frac{1}{N(N-1)}$.
\begin{align}
    EI_{star} = \dfrac{1}{N}\cdot\Bigg[ \sum_{i=1}^{N-1} &\text{D}_{_{KL}}\Big[\dfrac{1}{1} || \dfrac{N-1}{N}\Big] +\nonumber\\ &\text{D}_{_{KL}}\Big[\dfrac{1}{N-1} || \dfrac{1}{N(N-1)}\Big]\Bigg] \tag{13}
\end{align}

\begin{figure*}[t]
    \centering
    \includegraphics[width=0.9\textwidth]{figures/EffectiveInformation_NetworkMotifs.pdf}
    \caption{\textbf{Effective Information of network motifs.} All directed 3-node subgraphs and their $EI$.}
    \label{fig:networkmotifs}
\end{figure*}

Using the same techniques as above, this equation reduces to:
\begin{align}
    EI_{star} &= \dfrac{1}{N}\cdot\Bigg[(N-1)\cdot\log_{2}\Bigg(\dfrac{\dfrac{1}{1}}{\dfrac{(N-1)}{N}}\Bigg) +\nonumber\\ &\hspace{2.75cm}\log_{2}\Bigg(\dfrac{\dfrac{1}{N-1}}{\dfrac{1}{N(N-1)}}\Bigg)\Bigg] \nonumber \\
    EI_{star} &= \dfrac{N-1}{N}\cdot\log_{2}\Big(\frac{N}{N-1}\Big) + \dfrac{1}{N}\cdot\log_{2}\big(N\big) \nonumber \\ 
    EI_{star} &= 0.0 \hspace{0.2cm} \text{as} \hspace{0.15cm} \lim_{N\to\infty} \tag{14}
\end{align}

\begin{figure*}[t!]
    \centering
    \includegraphics[width=0.925\textwidth]{figures/Konect_SortedEffectiveness_withLabels.pdf}
    \caption{\textbf{Effectiveness of real networks.} Full data behind the results summarized in Fig. \ref{fig:ei_real_nets}, color-coded in two ways. First by 16 ``Domains'' (as in Table \ref{table_RealNetworkData}), which corresponds to the classification of each network from its source repository (in this case, the Konect database \protect\cite{Kunegis2013} or the Network Repository \protect\cite{Rossi2015}). The second categorization we report---those used in Fig. \ref{fig:ei_real_nets}---involves grouping the Domains into four ``Categories'' (``Cat.'' in Table \ref{table_RealNetworkData}): Biological, Information, Social, and Technological. These correspond to the colored squares to the right of each network's name.}
    \label{fig:Konect_full}
\end{figure*}

\begin{figure*}[t]
    \centering
    \includegraphics[width=0.99\textwidth]{figures/15_inacc_comparison.pdf}
    \caption{\textbf{Typically minimal inconsistency of higher-order macro-nodes.}  Each inset is of the microscale network, where each node's color corresponds to the $\mu | \pi$ macro-node it has been mapped to following one instance of the greedy algorithm detailed in the Materials \& Methods section. White nodes indicate a micro-node that was not grouped into a new macro-node. Inconsistency is plotted over time.}
    \label{fig:15inaccuracies}
\end{figure*}


\subsection{\label{sec:motifs}Network motifs as causal relationships} 

It is important to understand why certain motifs have more $EI$ while others have less. In Fig. \ref{fig:networkmotifs}, we show the $EI$ in 13 directed three-node network motifs. The connectivity of each motif drastically influences the $EI$. Motif 09---the directed cycle---is the motif with the highest $EI$. Intuitively, this fits with our definition of $EI$: the amount of certainty in the network (notably, each link in Motif 09, if taken to represent a causal relationship, is both necessary and sufficient). A random walker in this system has zero entropy (even if the direction of its path were reversed), whereas every other three-node motif does not contain that degree of certainty. Second, we see that Motif 04---a system with a ``sink'' node---has no $EI$, suggesting that a causal structure with that architecture is not informative, since all causes lead to the same effect. Similarly, because there are no outputs from two nodes in Motif 01, we see an $EI$ value of zero.


\subsection{\label{sec:SI_real_network_table}Table of network data}

In Table \ref{table_RealNetworkData}, we report the name, domain, source, category, and description of each of the 84 networks used in our comparison of $EI$ in real networks. These networks were selected primarily from the Konect database \protect\cite{Kunegis2013}, with supplemental datasets added from NetworkRepository \protect\cite{Rossi2015} when the Konect database lacked a sufficient number of datasets in a given category, since the two databases already significantly overlapped. In many cases, the interactions among nodes in these networks (i.e., their edges) can reasonably be interpreted as causal, directed influence, or dependencies such that the behavior of a node, $v_i$, at a given time can be thought to impact the behavior of its neighbors, $v_j$. By instituting relatively minimal requirements for selecting the above networks, we are able to assess the $EI$ in a variety of complex systems across different domains. However, while we can measure the $EI$ of any given network, the further interpretation of this $EI$ depends also on what the nodes and edges of a network represent. In a case where the nodes represent states of a system, such as a Markov process, then the $EI$ directly captures the information in the causal structure. In the case where the nodes represent merely dependencies or influence, $EI$ can still be informative as a metric to compare different networks. In a network specifically composed of non-causal correlations, then $EI$ is merely a structural property of the network's connectivity.

\begin{table*}[t!]
    \centering
    \begin{tabular}{| l | l | l | l | l |}
        \hline
        \textbf{Network name} & \textbf{Domain} & \textbf{Source} & \textbf{Cat.} & \textbf{Description} \\
        \hline \hline
        HEP-th citations & Citation & Konect & Inf. & high-energy physics (HEP) citations - theory \\ \hline
        HEP-ph citations & Citation & Konect & Inf. & HEP citations - phenomenology \\ \hline
        Cora citations & Citation & Konect & Inf. & citations from the Cora database \\ \hline
        DBLP citations & Citation & Konect & Inf. & database of scientific publications \\ \hline
        Astro-ph coauthorships & Coauthorship & Konect & Inf. & coauthors on astronomy arXiv papers \\ \hline
        HEP-th coauthorships & Coauthorship & Konect & Inf. & coauthors on HEP-theory arXiv papers \\ \hline
        HEP-ph coauthorships & Coauthorship & Konect & Inf. & coauthors on HEP-phenomenology arXiv papers \\ \hline
        Tarragona univ. emails & Communication & Konect & Soc. & emails from the University Rovira i Virgili \\ \hline
        Dem. Nat. Comm. emails & Communication & Konect & Soc. & 2016 Democratic National Committee email leak \\ \hline
        Digg user-user replies & Communication & Konect & Soc. & reply network from the social news website Digg \\ \hline
        UC Irvine messages & Communication & Konect & Soc. & messages between students at UC Irvine \\ \hline
        Manufacturing emails & Communication & Konect & Soc. & internal emails between employees at a company \\ \hline
        CAIDA autonomous systems & Computer & Konect & Tec. & autonomous systems network from CAIDA, 2007 \\ \hline
        Route views autonomous systems & Computer & Konect & Tec. & autonomous systems network \\ \hline
        Internet autonomous systems & Computer & Konect & Tec. & connected IP routing \\ \hline
        Haggle RFID contact & Human Contact & Konect & Soc. & human proximity, via carried wireless devices \\ \hline
        Reality mining RFID & Human Contact & Konect & Soc. & RFID data from 100 MIT students' interactions \\ \hline
        California windsurfers & Human Contact & Konect & Soc. & contacts between windsurfers California, 1986 \\ \hline
        Train terrorists & Human Contact & Konect & Soc. & contacts between Madrid train bombing suspects \\ \hline
        Hypertext conference & Human Contact & Konect & Soc. &  face-to-face contacts at the ACM Hypertext 2009 \\ \hline
        Infectious conference & Human Contact & Konect & Soc. & face-to-face contacts at INFECTIOUS, 2009 \\ \hline
        Jazz musicians & Human Social & Konect & Soc. & collaboration network between Jazz musicians \\ \hline
        Adolescent health & Human Social & Konect & Soc. & surveyed students list their best friends \\ \hline
        Physicians & Human Social & Konect & Soc. & innovation spread network among 246 physicians \\ \hline
        Resident hall & Human Social & Konect & Soc. & friendship ratings between students in a dorm \\ \hline
        Sampson cloister & Human Social & Konect & Soc. & relations between monks in a monastery \\ \hline
        Seventh graders & Human Social & Konect & Soc. & proximity ratings between seventh grade students \\ \hline
        Taro gift-giving & Human Social & Konect & Soc. & gift-givings (taro) between households \\ \hline
        Dutch college & Human Social & Konect & Soc. & friendship ratings between university freshmen \\ \hline
        Highland tribes & Human Social & Konect & Soc. & tribes in the Gahuku-Gama alliance structure \\ \hline
        Illinois school & Human Social & Konect & Soc. & friendships between boys at an Illinois highschool \\ \hline
        Free online dict. & Hyperlink & Konect & Inf. & cross references in Free Online Dict. of Computing \\ \hline
        Political blogs & Hyperlink & Konect & Inf. & hyperlinks between blogs, 2004 US election \\ \hline
        Google internal & Hyperlink & Konect & Inf. & hyperlink network from pages within Google.com \\ \hline
        Air traffic control & Infrastructure & Konect & Tec. & USA's FAA, Preferred Routes Database \\ \hline
        OpenFlights v1 & Infrastructure & Konect & Tec. & flight network between airports, OpenFlights.org \\ \hline
        OpenFlights v2 & Infrastructure & Konect & Tec. & flight network between airports, OpenFlights.org \\ \hline
        Contiguous U.S. & Infrastructure & Konect & Tec. & 48 contiguous states and D.C. of the U.S. \\ \hline
        European roads & Infrastructure & Konect & Tec. & international E-road network, mainly in Europe \\ \hline
        Chicago roads & Infrastructure & Konect & Tec. & road transportation network of the Chicago region \\ \hline
        West U.S. powergrid & Infrastructure & Konect & Tec. & power grid of the Western U.S. \\ \hline
        U.S. Airports & Infrastructure & Konect & Tec. & flights between US airports in 2010 \\ \hline
        David Copperfield & Lexical & Konect & Inf. & network of common noun and adjective adjacencies \\ \hline
        Edinburgh thesaurus & Lexical & Konect & Inf. & word association network, collected experimentally \\ \hline
        King James Bible & Lexical & Konect & Inf. & co-occurrence between nouns in the Bible \\ \hline
    \end{tabular}
    \caption{\textbf{Network datasets.} Continued on the following page.}
    \label{table_RealNetworkData}
\end{table*}

\setcounter{table}{1}
\begin{table*}[t!]
    \centering
    \begin{tabular}{| l | l | l | l | l |}
        \hline
        \textbf{Network name} & \textbf{Domain} & \textbf{Source} & \textbf{Cat.} & \textbf{Description} \\
        \hline \hline
        C. elegans metabolic & Metabolic & Konect & Bio. & metabolic network of the \textit{C. elegans} roundworm \\ \hline
        Human protein (Figeys) & Metabolic & Konect & Bio. & interactions network of proteins in Humans \\ \hline
        PDZbase protein & Metabolic & Konect & Bio. & protein-protein interactions from PDZBase \\ \hline
        Human protein (Stelzl) & Metabolic & Konect & Bio. & interactions network of proteins in Humans \\ \hline
        Human protein (Vidal) & Metabolic & Konect & Bio. & proteome-scale map of Human protein interactions \\ \hline
        Yeast protein & Metabolic & Konect & Bio. & protein interactions contained in yeast \\ \hline
        Reactome humans & Metabolic & Konect & Bio. & protein interactions, from the Reactome project \\ \hline
        Avogato & Social & Konect & Soc. & trust network for users of Advogato \\ \hline
        Google+ & Social & Konect & Soc. & Google+ user-user connections \\ \hline
        Hamsterster & Social & Konect & Soc. & friendships between users of hamsterster.com \\ \hline
        Twitter lists & Social & Konect & Soc. & Twitter user-user following network \\ \hline
        Facebook NIPS & Social & Konect & Soc. & Facebook user-user friendship network \\ \hline
        Linux dependency & Software & Konect & Inf. & Linux source code dependency network \\ \hline
        J.D.K. dependency & Software & Konect & Inf. & software class dependencies, JDK 1.6.0.7 \\ \hline
        JUNG/javax dependency & Software & Konect & Inf. & software class dependencies, JUNG 2.0.1 \& javax \\ \hline
        Florida ecosystem - dry & Trophic & Konect & Bio. & food web in the Florida wetlands (dry season) \\ \hline
        Florida ecosystem - wet & Trophic & Konect & Bio. & food web in the Florida wetlands (wet season) \\ \hline
        Little Rock Lake ecosystem & Trophic & Konect & Bio. & food web of Little Rock Lake, Wisconsin \\ \hline
        WHOIS protocol & Technological & NetworkRepository & Tec. & dataset of internet routing registries \\ \hline
        PGP protocol & Technological & NetworkRepository & Tec. & trust protocol of private keys of internet users \\ \hline
        Routers RF & Technological & NetworkRepository & Tec. & traceroute network between routers via Rocketfuel  \\ \hline
        Cat brain 1 & Brain & NetworkRepository & Bio. & fiber tracts between brain regions of a cat \\ \hline
        Drosophila medulla & Brain & NetworkRepository & Bio. & neuronal network from the medulla of a fly \\ \hline
        Rhesus brain 1 & Brain & NetworkRepository & Bio. & collation of tract tracing studies in primates \\ \hline
        Rhesus brain 2 & Brain & NetworkRepository & Bio. & inter-areal cortical networks from a primate \\ \hline
        Macaque cerebral & Brain & NetworkRepository & Bio. & connections between cerebral cortex of a primate \\ \hline
        Macaque interareal & Brain & NetworkRepository & Bio. & inter-areal cortical networks from  a primate \\ \hline
        Mouse Kasthuri & Brain & NetworkRepository & Bio. & neuronal network of a mouse \\ \hline
        Mouse brain 1 & Brain & NetworkRepository & Bio. & calcium imaging of neuronal networks in a mouse  \\ \hline
        Mouse retina 1 & Brain & NetworkRepository & Bio. & electron microscopy of neurons in mouse retina \\ \hline
        Mouse visual 1 & Brain & NetworkRepository & Bio. & electron microscopy of visual cortex of a mouse \\ \hline
        Mouse visual 2 & Brain & NetworkRepository & Bio. & electron microscopy of visual cortex of a mouse \\ \hline
        Power 1138BUS & Powergrid & NetworkRepository & Tec. & power system admittance, via Harwell-Boeing \\ \hline
        Power 494BUS & Powergrid & NetworkRepository & Tec. & power system admittance, via Harwell-Boeing \\ \hline
        Power 662BUS & Powergrid & NetworkRepository & Tec. & power system admittance, via Harwell-Boeing \\ \hline
        Power 685BUS & Powergrid & NetworkRepository & Tec. & power system admittance, via Harwell-Boeing \\ \hline
        U.S. power grid & Powergrid & NetworkRepository & Tec. & electricity / power transmission network in the U.S.\\ \hline
        Power pcspwr 09 & Powergrid & NetworkRepository & Tec. & BCSPWR09 powergrid data via Harwell-Boeing \\ \hline
        Power pcspwr 10 & Powergrid & NetworkRepository & Tec. &  BCSPWR10 powergrid data via Harwell-Boeing \\ \hline
        Power ERIS1176 & Powergrid & NetworkRepository & Tec. & powergrid data via Erisman, 1973 \\ \hline
    \end{tabular}
    \caption{\textbf{Network datasets (continued).}}
\end{table*}


\subsection{\label{sec:SI_inacc_examples}Examples of consistent macro-nodes}

In Fig. \ref{fig:15inaccuracies} we display 15 different parameterizations of small networks grown under degree-based preferential attachment. Each plot shows to the inconsistency of the mapping from the microscale to the macroscale, in bits, which corresponds to the KL divergence of the distribution of random walkers on microscale nodes and the same distribution at the macroscale. Each of these networks are consistent after 1000 timesteps, with eight showing full consistency from the start. These 15 example networks also show the range of causal emergence values that is found in networks.
 
\begin{figure*}[t!]
    \centering
    \includegraphics[width=0.75\textwidth]{figures/CausalEmergence_SBM_mean_N100c_wNets.pdf}
    \caption{\textbf{Causal emergence in a simplified stochastic block model.} Schematic showing the role of the two relevant parameters---the fraction of nodes in each community (ranging from $r=0.50$ to $r<1.0$) and the fraction of within-cluster connections (ranging from $p=0.0$, a fully bipartite network, to $p=1.0$---two disconnected cliques). By repeatedly simulating networks under various combinations of parameters ($N=100$ with 100 simulations per combination of parameters), we see combinations that are more apt to produce networks with causal emergence.}
    \label{fig:sbm_ce}
\end{figure*}

\begin{figure*}[t!]
    \centering
    \subfloat[\label{fig:CE_ER_p}]{
        \includegraphics[width=0.9\columnwidth]{figures/CE_ER_p_N.pdf}
    }\hfill
    \subfloat[\label{fig:CE_ER_k}]{
        \includegraphics[width=0.9\columnwidth]{figures/CE_ER_k_N.pdf}
    }
    \caption{\textbf{Causal emergence in Erd\H{o}s-R\'enyi networks.} (\textbf{A}) As the edge density, $p$, of ER networks increases and $N$ is held constant, the amount of causal emergence quickly drops to zero. (\textbf{B}) This drop occurs well before $pN = \langle k \rangle=1$, meaning the algorithm for uncovering causal emergence is only grouping small, disconnected, tree-like subgraphs that have yet to form into a giant component. Of note here is the low magnitude of causal emergence even in cases where the random network is not a single large component, and the vanishing of causal emergence after it is.}
    \label{fig:CE_ER}
\end{figure*}


\subsection{\label{sec:SI_characterize_CE}Emergent subgraphs}

What sort of subgraph connectivity leads to causal emergence? To explore this we take two independent subgraphs, and couple them together while varying their size, moving from clique-like to bipartite connectivity. We then check to see if grouping those clusters into macro-nodes leads to causal emergence (Fig. \ref{fig:sbm_ce}). Specifically, we simulate many small unweighted, undirected networks ($N=100$) from a stochastic block model with two clusters, and we vary the probability of within-cluster edges (from 0.0 to 1.0) as well as the size-asymmetry of the two clusters (illustrated around the border of Fig. \ref{fig:sbm_ce}). In each simulation, we group the microscale network into two macro-nodes, each corresponding to one cluster. What we observe is a causal emergence landscape with several important characteristics (Fig. \ref{fig:sbm_ce}). First, in these networks we observe causal emergence when the fraction of within-cluster connections is either very high or very low (right and left sides of the heatmap in Fig. \ref{fig:sbm_ce}). These are the conditions in which there is a large amount of uncertainty, or noise, in that subgraph. Not only that, however, causal emergence is most likely when there is a size asymmetry between the two clusters, suggesting that macroscales that maximize a network's $EI$ often do so by creating a more evenly distributed $\langle W^{out}_{i}\rangle$. In general, however, the space of subgraphs leans toward causal reduction (a loss of $EI$ after grouping), which fits with the success of reduction historically and explains why researchers and modelers should generally be biased toward reduction.

In cases of complete noise, with no asymmetries or differences between intra- or inter-connectivity between subgraphs, we should expect causal emergence to be impossible. Indeed, this is what we see for many parameterizations of Erd\H{o}s-R\'enyi networks of various sizes (Fig. \ref{fig:CE_ER}). This result follows from insights in Fig. \ref{fig:ei_p}, where the $EI$ of ER networks converges to a fixed value of $-\log_2(p)$ as the size of the network increases. Here, we observe some causal emergence in ER networks but only when the networks are very small. Importantly, the amount of causal emergence is also very small, especially relative to the causal emergence in networks with preferential attachment. This further suggests that causal emergence moves the existent structure of the network into focus by examining the network at a certain scale, rather than creating that structure from nothing.
