# Supplementary material for: The Emergence of Informative Higher Scales in Complex Networks
Source: Hindawi journal article supplement (doi:10.1155/2020/8932526), 2020-04-04
Supplement: f1 [file 8932526.f1.zip › 8932526.f1/table_SI1.tex]

\documentclass[a4paper, 11pt]{standalone}
\usepackage{amsmath}
\begin{document}

\begin{tabular}{| l | l | l |}
    \textbf{Term} & \textbf{Description} & \textbf{Notation} \\
    \hline \hline
    Network size & the number of nodes in the network & $ N $ \\ \hline
    Out-weight vector ($v_i$) & a vector of probabilities $w_{ij}$ that a random walker on node $v_i$ will transition to $v_j$ & $ W^{out}_{i} = \{w_{i1}, w_{i2},,... w_{ij}, ... w_{iN}\}$ \\ \hline
    Effective information (network) & the total information in a causal structure, in bits & $EI = {{H}(\langle W^{out}_{i}\rangle)} - {\langle {H}(W^{out}_{i}) \rangle}$ \\ \hline
    Determinism ($v_i$) & how certain about next steps is a random walker on $v_i$ & $\text{det}_{i} = \log_2(N) - H(W^{out}_{i})$ \\ \hline
    Degeneracy (network) & how distributed the certainty is over the nodes of the network & $\text{degeneracy} = \log_2(N) - H(\langle W^{out}_{i}\rangle)$ \\ \hline
    Effect information ($v_i$) & the contribution of each node $v_i$ to the network's $EI$ & $EI_{i} = \text{D}_{_{KL}}[ W^{out}_{i} || \langle W^{out}_{i}\rangle ]$ \\ \hline
    Micro-nodes in a macro-node & the set of micro-nodes grouped into a macro-node in the new network, $G_M$ & $S = \{v_i, v_j, ...\}$, of length $N_S$ \\ \hline
    Macro-node out-weights & the out-weights from macro-node, $\mu$, to its neighbors & $W_{\mu}^{out} = \displaystyle\sum_{i \in S} W_i^{out} \cdot \Big(\dfrac{1}{N_S}\Big)$ \\ \hline
    Macro-node out-weights given input weights & the out-weights from macro-node, $\mu$, to its neighbors, \textit{conditioned} on in-weights to the micro-nodes, $v_i \in S$ & $W_{\mu|j}^{out} = \displaystyle\sum_{i \in S} W_i^{out} \cdot \Big(\dfrac{\sum_{j->i} w_{ji}}{\sum_{j->k \in S} w_{jk}}\Big)$ \\ \hline
    Macro-node out-weights given the stationary distribution & the out-weights from macro-node, $\mu$, to its neighbors, conditioned on the stationary probabilities, $\pi_i$, of micro-nodes, $v_i \in S$ &  $W_{\mu|\pi}^{out} = \displaystyle\sum_{i \in S} W_i^{out} \cdot \Big(\dfrac{\pi_i}{\sum_{k\in S} \pi_k}\Big)$ \\ \hline
\end{tabular}

% \label{table_of_terms}
% \caption{\textbf{Table of key terms}. Quantities needed in order to calculate $EI$ and create consistent macro-nodes.}

\end{document}
