# Supplementary material for: The Emergence of Informative Higher Scales in Complex Networks
Source: Hindawi journal article supplement (doi:10.1155/2020/8932526), 2020-04-04
Supplement: f1 [file 8932526.f1.zip › 8932526.f1/table_SI2.tex]

\documentclass[a4paper, 11pt]{standalone}
\begin{document}

\begin{tabular}{| l | l | l | l | l |}
    \hline
    \textbf{Network name} & \textbf{Domain} & \textbf{Source} & \textbf{Cat.} & \textbf{Description} \\
    \hline \hline
    HEP-th citations & Citation & Konect & Inf. & high-energy physics (HEP) citations - theory \\ \hline
    HEP-ph citations & Citation & Konect & Inf. & HEP citations - phenomenology \\ \hline
    Cora citations & Citation & Konect & Inf. & citations from the Cora database \\ \hline
    DBLP citations & Citation & Konect & Inf. & database of scientific publications \\ \hline
    Astro-ph coauthorships & Coauthorship & Konect & Inf. & coauthors on astronomy arXiv papers \\ \hline
    HEP-th coauthorships & Coauthorship & Konect & Inf. & coauthors on HEP-theory arXiv papers \\ \hline
    HEP-ph coauthorships & Coauthorship & Konect & Inf. & coauthors on HEP-phenomenology arXiv papers \\ \hline
    Tarragona univ. emails & Communication & Konect & Soc. & emails from the University Rovira i Virgili \\ \hline
    Dem. Nat. Comm. emails & Communication & Konect & Soc. & 2016 Democratic National Committee email leak \\ \hline
    Digg user-user replies & Communication & Konect & Soc. & reply network from the social news website Digg \\ \hline
    UC Irvine messages & Communication & Konect & Soc. & messages between students at UC Irvine \\ \hline
    Manufacturing emails & Communication & Konect & Soc. & internal emails between employees at a company \\ \hline
    CAIDA autonomous systems & Computer & Konect & Tec. & autonomous systems network from CAIDA, 2007 \\ \hline
    Route views autonomous systems & Computer & Konect & Tec. & autonomous systems network \\ \hline
    Internet autonomous systems & Computer & Konect & Tec. & connected IP routing \\ \hline
    Haggle RFID contact & Human Contact & Konect & Soc. & human proximity, via carried wireless devices \\ \hline
    Reality mining RFID & Human Contact & Konect & Soc. & RFID data from 100 MIT students' interactions \\ \hline
    California windsurfers & Human Contact & Konect & Soc. & contacts between windsurfers California, 1986 \\ \hline
    Train terrorists & Human Contact & Konect & Soc. & contacts between Madrid train bombing suspects \\ \hline
    Hypertext conference & Human Contact & Konect & Soc. &  face-to-face contacts at the ACM Hypertext 2009 \\ \hline
    Infectious conference & Human Contact & Konect & Soc. & face-to-face contacts at INFECTIOUS, 2009 \\ \hline
    Jazz musicians & Human Social & Konect & Soc. & collaboration network between Jazz musicians \\ \hline
    Adolescent health & Human Social & Konect & Soc. & surveyed students list their best friends \\ \hline
    Physicians & Human Social & Konect & Soc. & innovation spread network among 246 physicians \\ \hline
    Resident hall & Human Social & Konect & Soc. & friendship ratings between students in a dorm \\ \hline
    Sampson cloister & Human Social & Konect & Soc. & relations between monks in a monastery \\ \hline
    Seventh graders & Human Social & Konect & Soc. & proximity ratings between seventh grade students \\ \hline
    Taro gift-giving & Human Social & Konect & Soc. & gift-givings (taro) between households \\ \hline
    Dutch college & Human Social & Konect & Soc. & friendship ratings between university freshmen \\ \hline
    Highland tribes & Human Social & Konect & Soc. & tribes in the Gahuku-Gama alliance structure \\ \hline
    Illinois school & Human Social & Konect & Soc. & friendships between boys at an Illinois highschool \\ \hline
    Free online dict. & Hyperlink & Konect & Inf. & cross references in Free Online Dict. of Computing \\ \hline
    Political blogs & Hyperlink & Konect & Inf. & hyperlinks between blogs, 2004 US election \\ \hline
    Google internal & Hyperlink & Konect & Inf. & hyperlink network from pages within Google.com \\ \hline
    Air traffic control & Infrastructure & Konect & Tec. & USA's FAA, Preferred Routes Database \\ \hline
    OpenFlights v1 & Infrastructure & Konect & Tec. & flight network between airports, OpenFlights.org \\ \hline
    OpenFlights v2 & Infrastructure & Konect & Tec. & flight network between airports, OpenFlights.org \\ \hline
    Contiguous U.S. & Infrastructure & Konect & Tec. & 48 contiguous states and D.C. of the U.S. \\ \hline
    European roads & Infrastructure & Konect & Tec. & international E-road network, mainly in Europe \\ \hline
    Chicago roads & Infrastructure & Konect & Tec. & road transportation network of the Chicago region \\ \hline
    West U.S. powergrid & Infrastructure & Konect & Tec. & power grid of the Western U.S. \\ \hline
    U.S. Airports & Infrastructure & Konect & Tec. & flights between US airports in 2010 \\ \hline
    David Copperfield & Lexical & Konect & Inf. & network of common noun and adjective adjacencies \\ \hline
    Edinburgh thesaurus & Lexical & Konect & Inf. & word association network, collected experimentally \\ \hline
    King James Bible & Lexical & Konect & Inf. & co-occurrence between nouns in the Bible \\ \hline
    C. elegans metabolic & Metabolic & Konect & Bio. & metabolic network of the \textit{C. elegans} roundworm \\ \hline
    Human protein (Figeys) & Metabolic & Konect & Bio. & interactions network of proteins in Humans \\ \hline
    PDZbase protein & Metabolic & Konect & Bio. & protein-protein interactions from PDZBase \\ \hline
    Human protein (Stelzl) & Metabolic & Konect & Bio. & interactions network of proteins in Humans \\ \hline
    Human protein (Vidal) & Metabolic & Konect & Bio. & proteome-scale map of Human protein interactions \\ \hline
    Yeast protein & Metabolic & Konect & Bio. & protein interactions contained in yeast \\ \hline
    Reactome humans & Metabolic & Konect & Bio. & protein interactions, from the Reactome project \\ \hline
    Avogato & Social & Konect & Soc. & trust network for users of Advogato \\ \hline
    Google+ & Social & Konect & Soc. & Google+ user-user connections \\ \hline
    Hamsterster & Social & Konect & Soc. & friendships between users of hamsterster.com \\ \hline
    Twitter lists & Social & Konect & Soc. & Twitter user-user following network \\ \hline
    Facebook NIPS & Social & Konect & Soc. & Facebook user-user friendship network \\ \hline
    Linux dependency & Software & Konect & Inf. & Linux source code dependency network \\ \hline
    J.D.K. dependency & Software & Konect & Inf. & software class dependencies, JDK 1.6.0.7 \\ \hline
    JUNG/javax dependency & Software & Konect & Inf. & software class dependencies, JUNG 2.0.1 \& javax \\ \hline
    Florida ecosystem - dry & Trophic & Konect & Bio. & food web in the Florida wetlands (dry season) \\ \hline
    Florida ecosystem - wet & Trophic & Konect & Bio. & food web in the Florida wetlands (wet season) \\ \hline
    Little Rock Lake ecosystem & Trophic & Konect & Bio. & food web of Little Rock Lake, Wisconsin \\ \hline
    WHOIS protocol & Technological & NetworkRepository & Tec. & dataset of internet routing registries \\ \hline
    PGP protocol & Technological & NetworkRepository & Tec. & trust protocol of private keys of internet users \\ \hline
    Routers RF & Technological & NetworkRepository & Tec. & traceroute network between routers via Rocketfuel  \\ \hline
    Cat brain 1 & Brain & NetworkRepository & Bio. & fiber tracts between brain regions of a cat \\ \hline
    Drosophila medulla & Brain & NetworkRepository & Bio. & neuronal network from the medulla of a fly \\ \hline
    Rhesus brain 1 & Brain & NetworkRepository & Bio. & collation of tract tracing studies in primates \\ \hline
    Rhesus brain 2 & Brain & NetworkRepository & Bio. & inter-areal cortical networks from a primate \\ \hline
    Macaque cerebral & Brain & NetworkRepository & Bio. & connections between cerebral cortex of a primate \\ \hline
    Macaque interareal & Brain & NetworkRepository & Bio. & inter-areal cortical networks from  a primate \\ \hline
    Mouse Kasthuri & Brain & NetworkRepository & Bio. & neuronal network of a mouse \\ \hline
    Mouse brain 1 & Brain & NetworkRepository & Bio. & calcium imaging of neuronal networks in a mouse  \\ \hline
    Mouse retina 1 & Brain & NetworkRepository & Bio. & electron microscopy of neurons in mouse retina \\ \hline
    Mouse visual 1 & Brain & NetworkRepository & Bio. & electron microscopy of visual cortex of a mouse \\ \hline
    Mouse visual 2 & Brain & NetworkRepository & Bio. & electron microscopy of visual cortex of a mouse \\ \hline
    Power 1138BUS & Powergrid & NetworkRepository & Tec. & power system admittance, via Harwell-Boeing \\ \hline
    Power 494BUS & Powergrid & NetworkRepository & Tec. & power system admittance, via Harwell-Boeing \\ \hline
    Power 662BUS & Powergrid & NetworkRepository & Tec. & power system admittance, via Harwell-Boeing \\ \hline
    Power 685BUS & Powergrid & NetworkRepository & Tec. & power system admittance, via Harwell-Boeing \\ \hline
    U.S. power grid & Powergrid & NetworkRepository & Tec. & electricity / power transmission network in the U.S.\\ \hline
    Power pcspwr 09 & Powergrid & NetworkRepository & Tec. & BCSPWR09 powergrid data via Harwell-Boeing \\ \hline
    Power pcspwr 10 & Powergrid & NetworkRepository & Tec. &  BCSPWR10 powergrid data via Harwell-Boeing \\ \hline
    Power ERIS1176 & Powergrid & NetworkRepository & Tec. & powergrid data via Erisman, 1973 \\ \hline
\end{tabular}

% \caption{\textbf{Network datasets.}}
% \label{table_RealNetworkData}

\end{document}
