# Supplementary figures and images for: The Emergence of Informative Higher Scales in Complex Networks
Source: Hindawi journal article supplement (doi:10.1155/2020/8932526), 2020-04-04

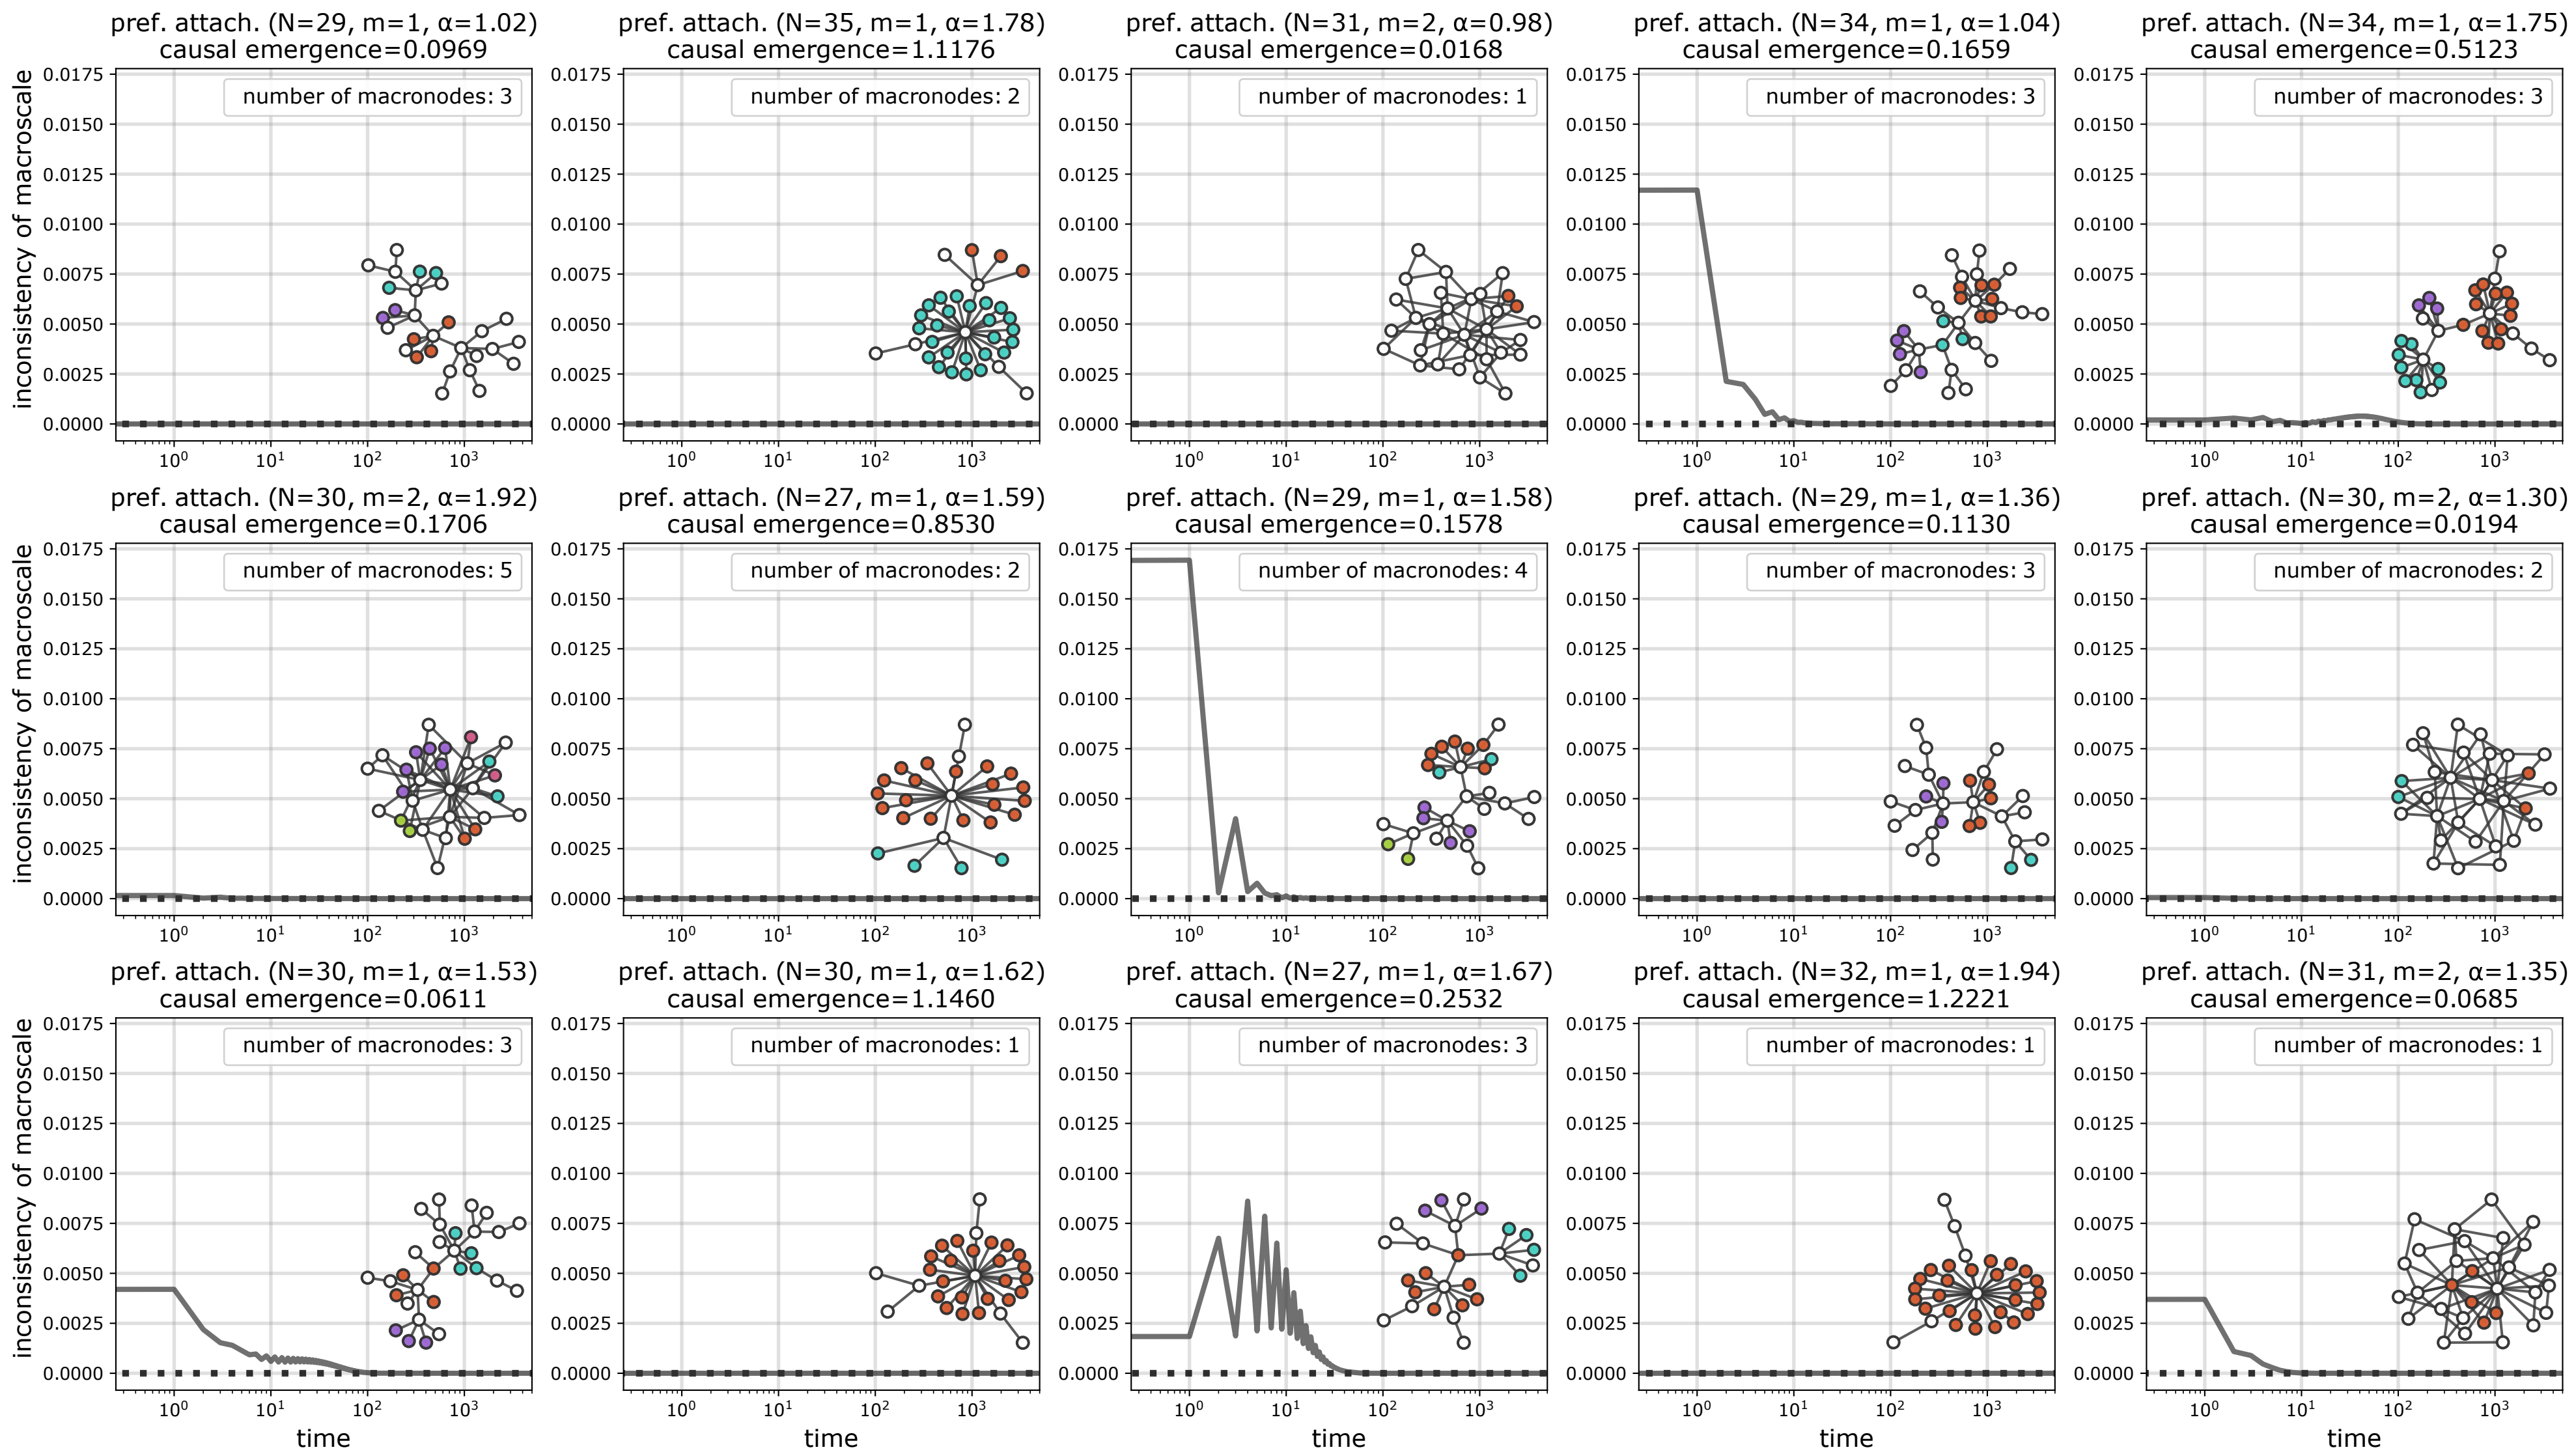

Supplement: f1 [file 8932526.f1.zip]

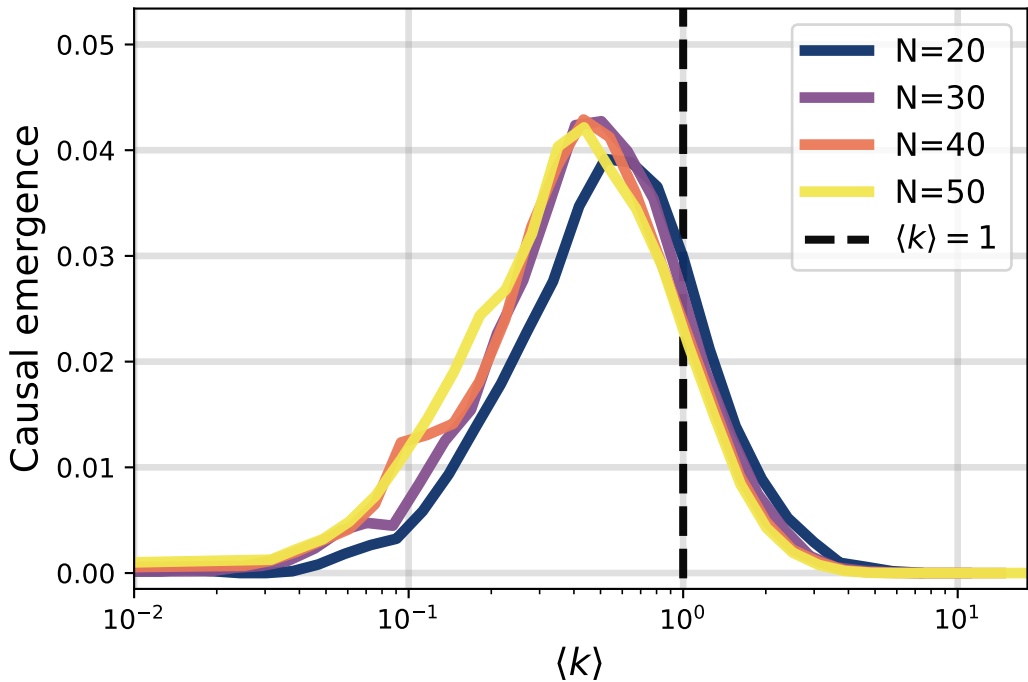

Supplement: f1 [file 8932526.f1.zip › 8932526.f1/CE_ER_k_N.pdf]

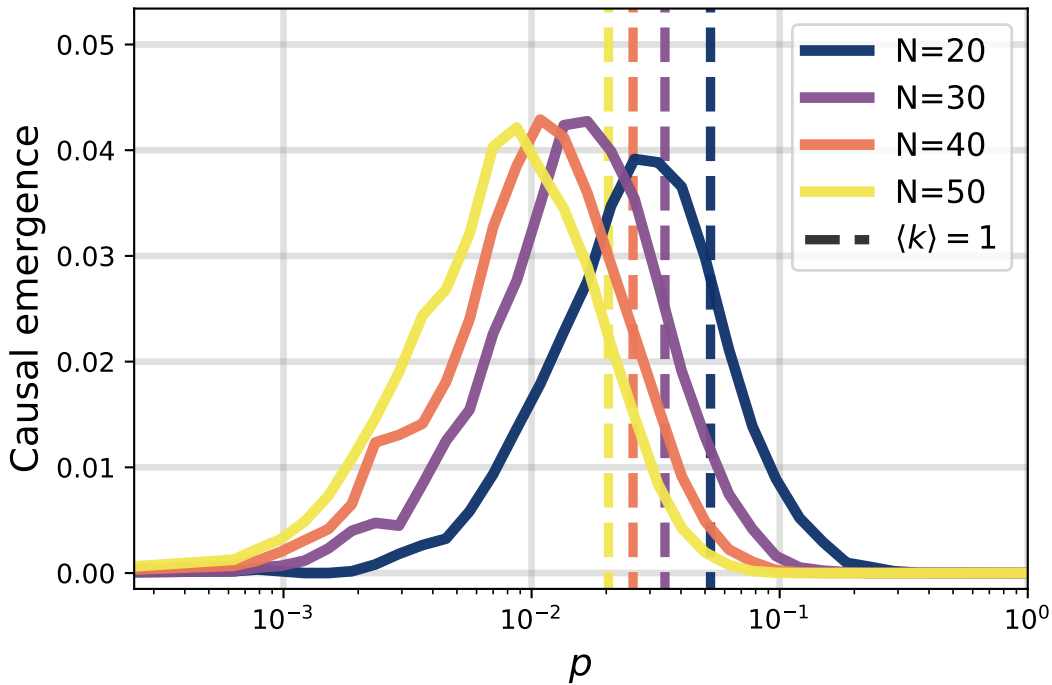

Supplement: f1 [file 8932526.f1.zip › 8932526.f1/CE_ER_p_N.pdf]

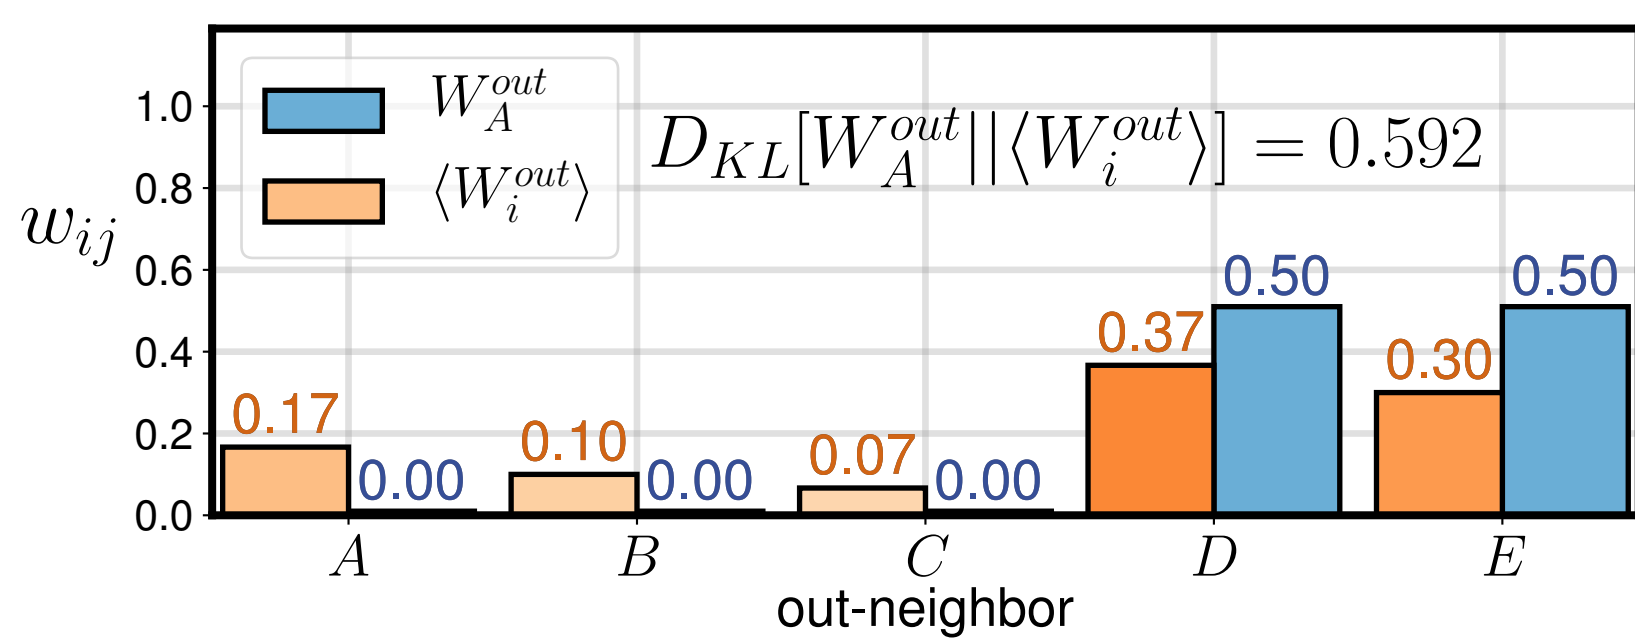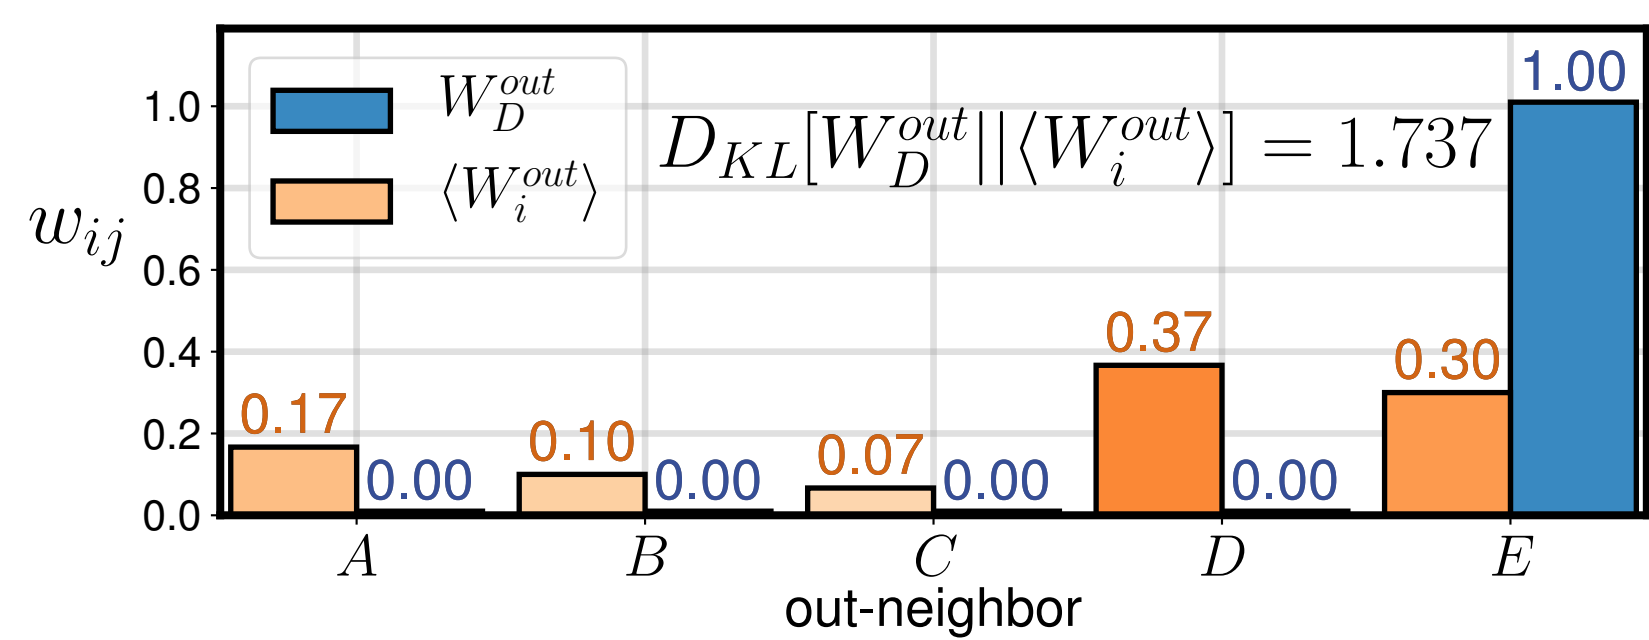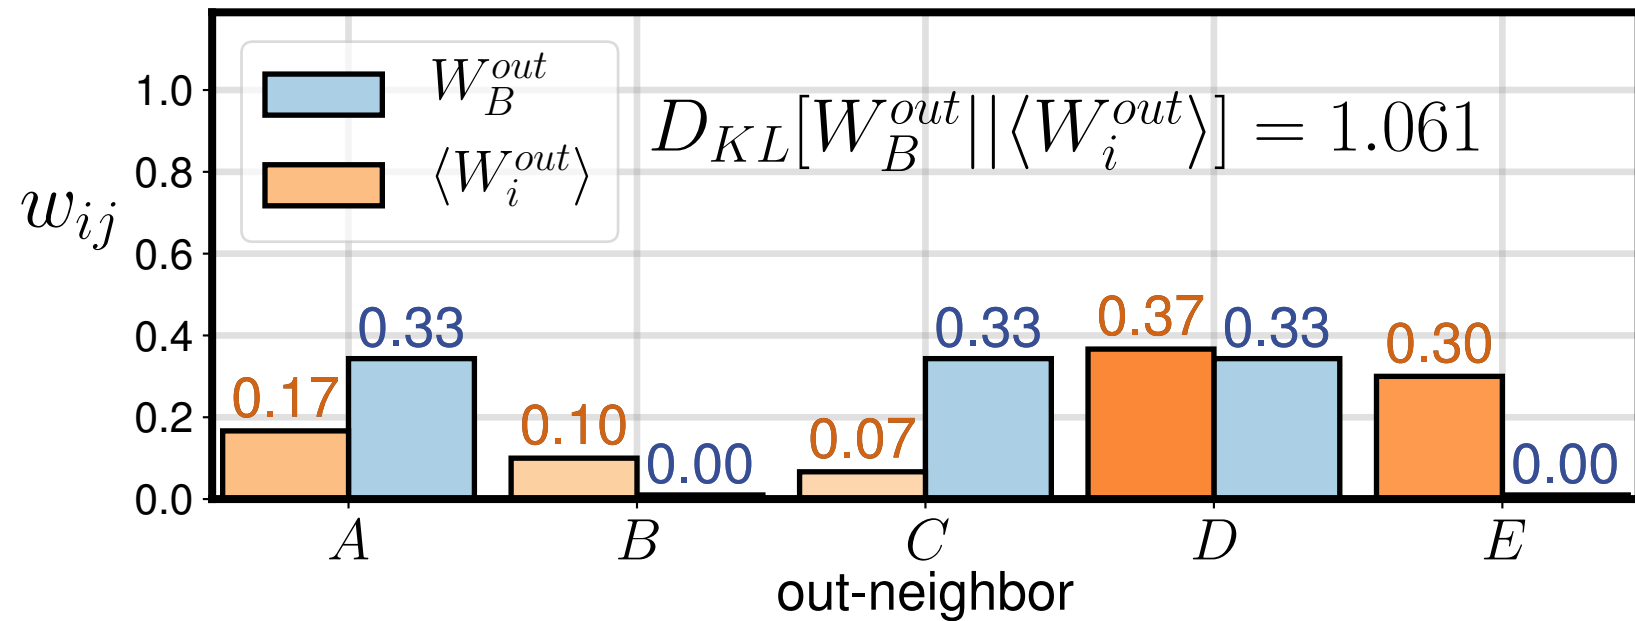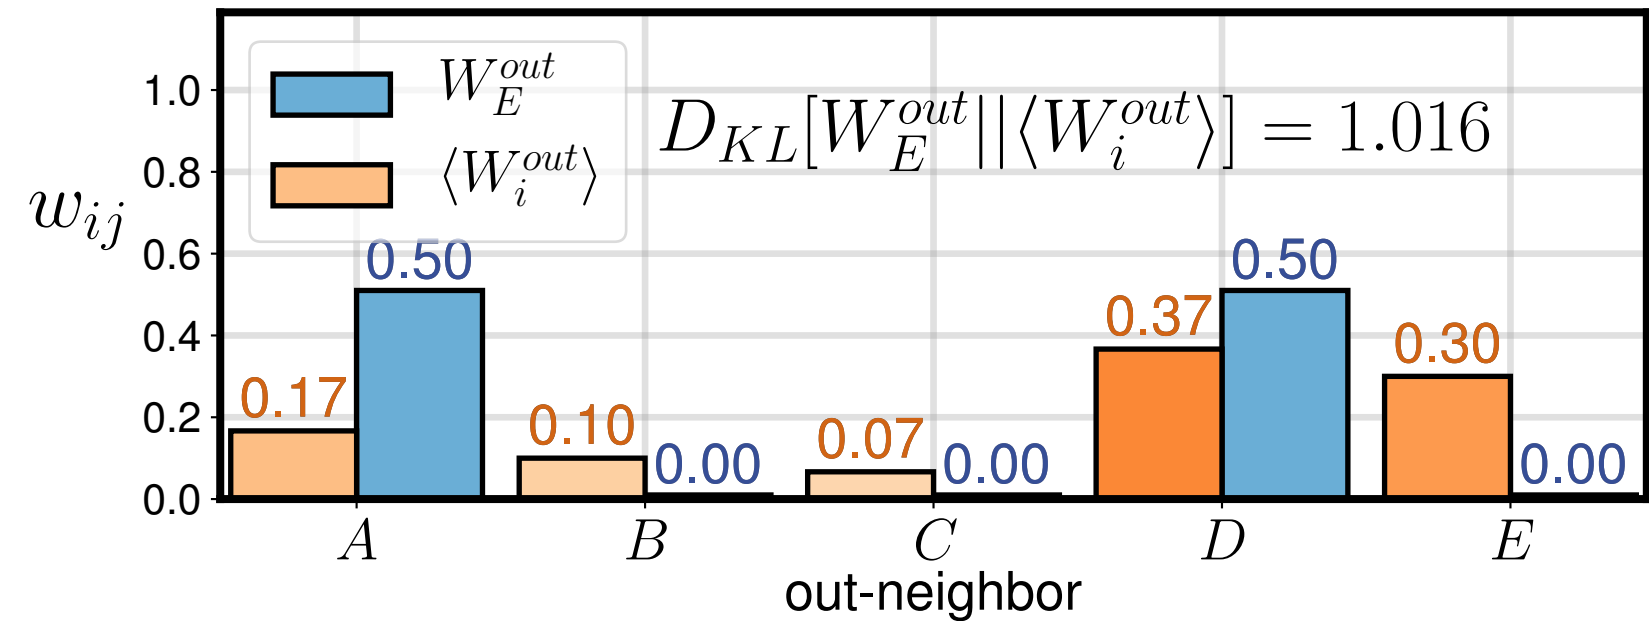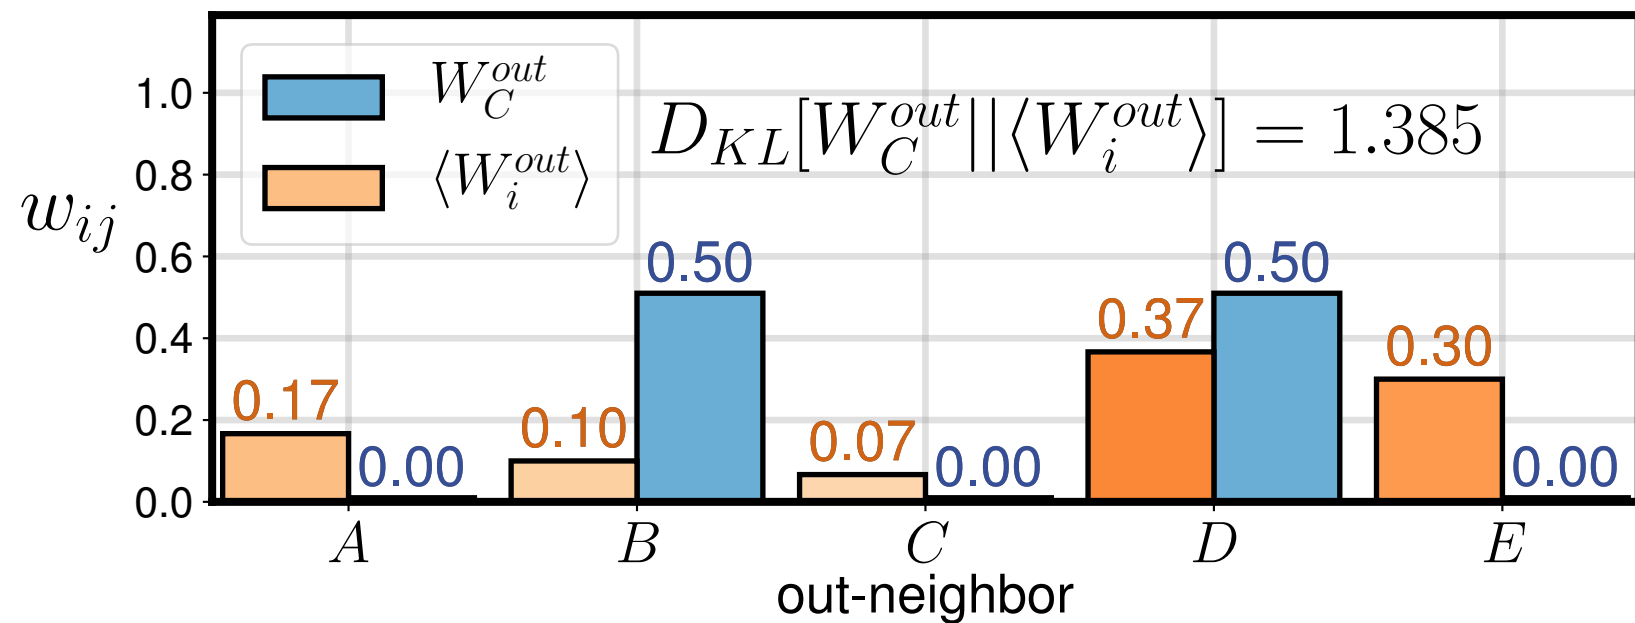

$$EI = \frac{1}{N} \sum_{i=1}^N D_{KL}[W_i^{out} || \langle W_i^{out} \rangle]$$

$$EI = \frac{1}{5} [0.592 + 1.061 + 1.385 + 1.737 + 1.016]$$

$$EI = 1.158 \text{ bits}$$

Supplement: f1 [file 8932526.f1.zip › 8932526.f1/EffectiveInfoCalculation_KLD.pdf]

$E$ 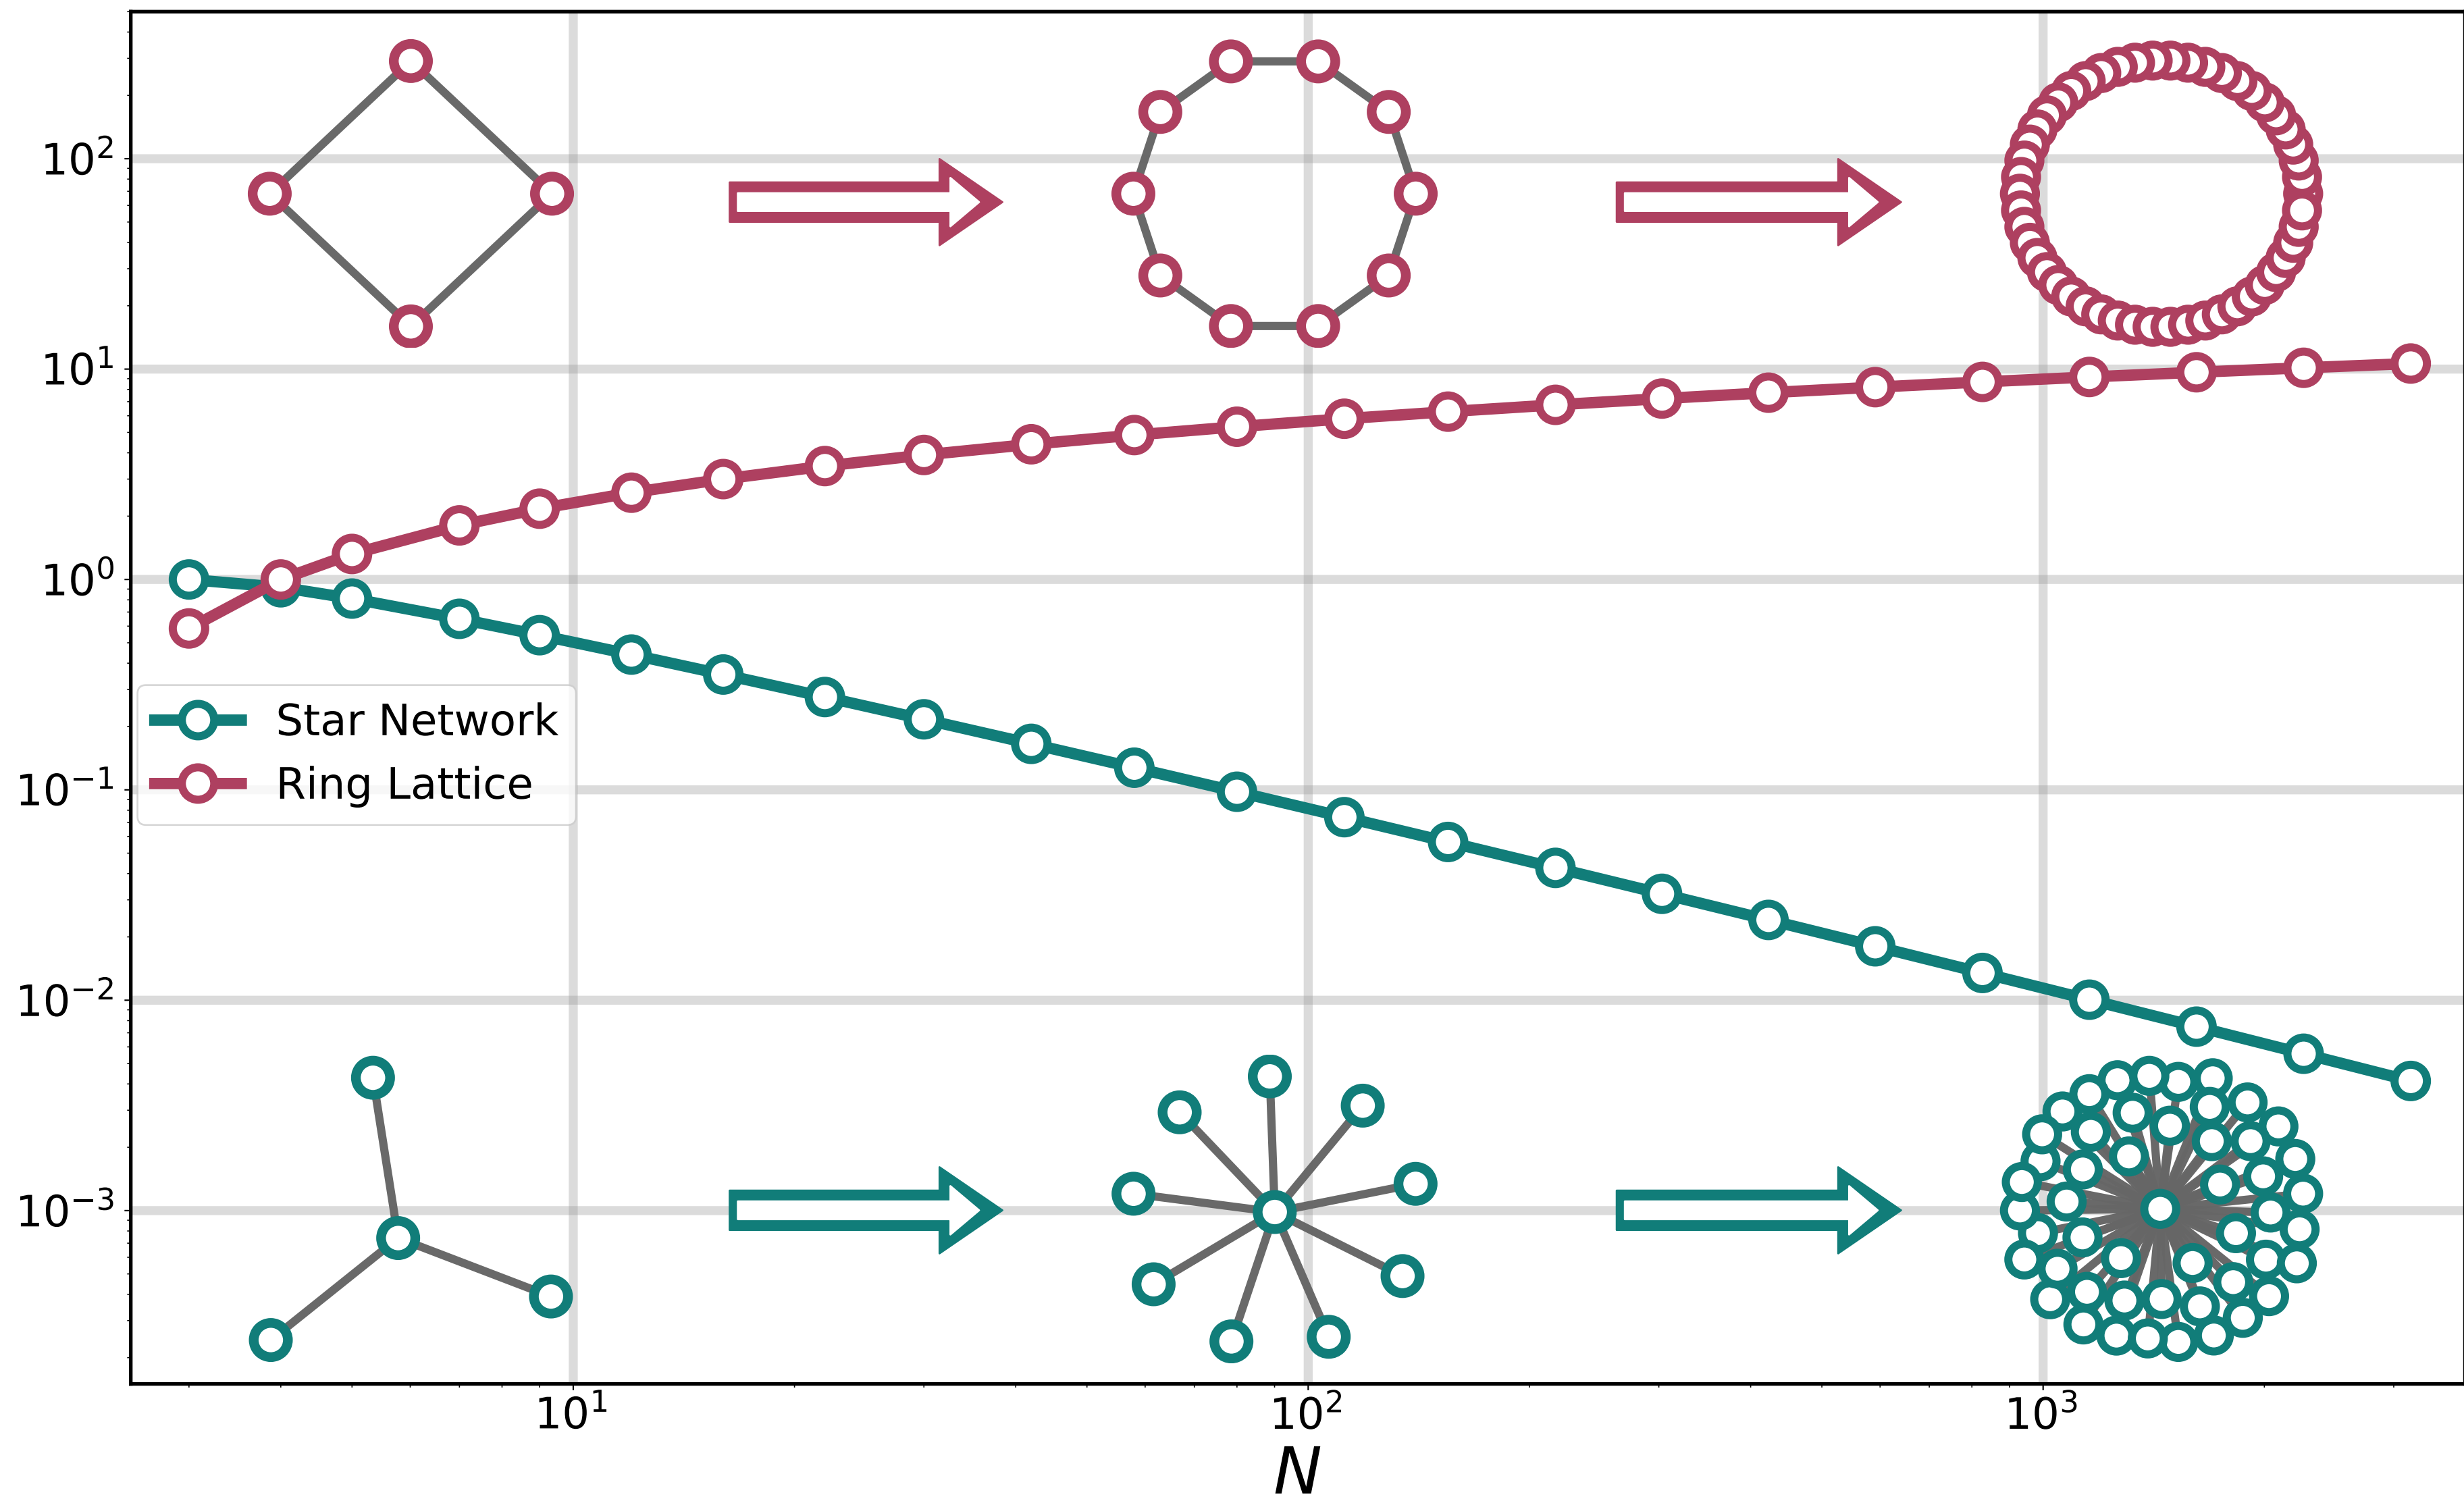

Supplement: f1 [file 8932526.f1.zip › 8932526.f1/EffectiveInformation_Compare_StarLine.pdf]

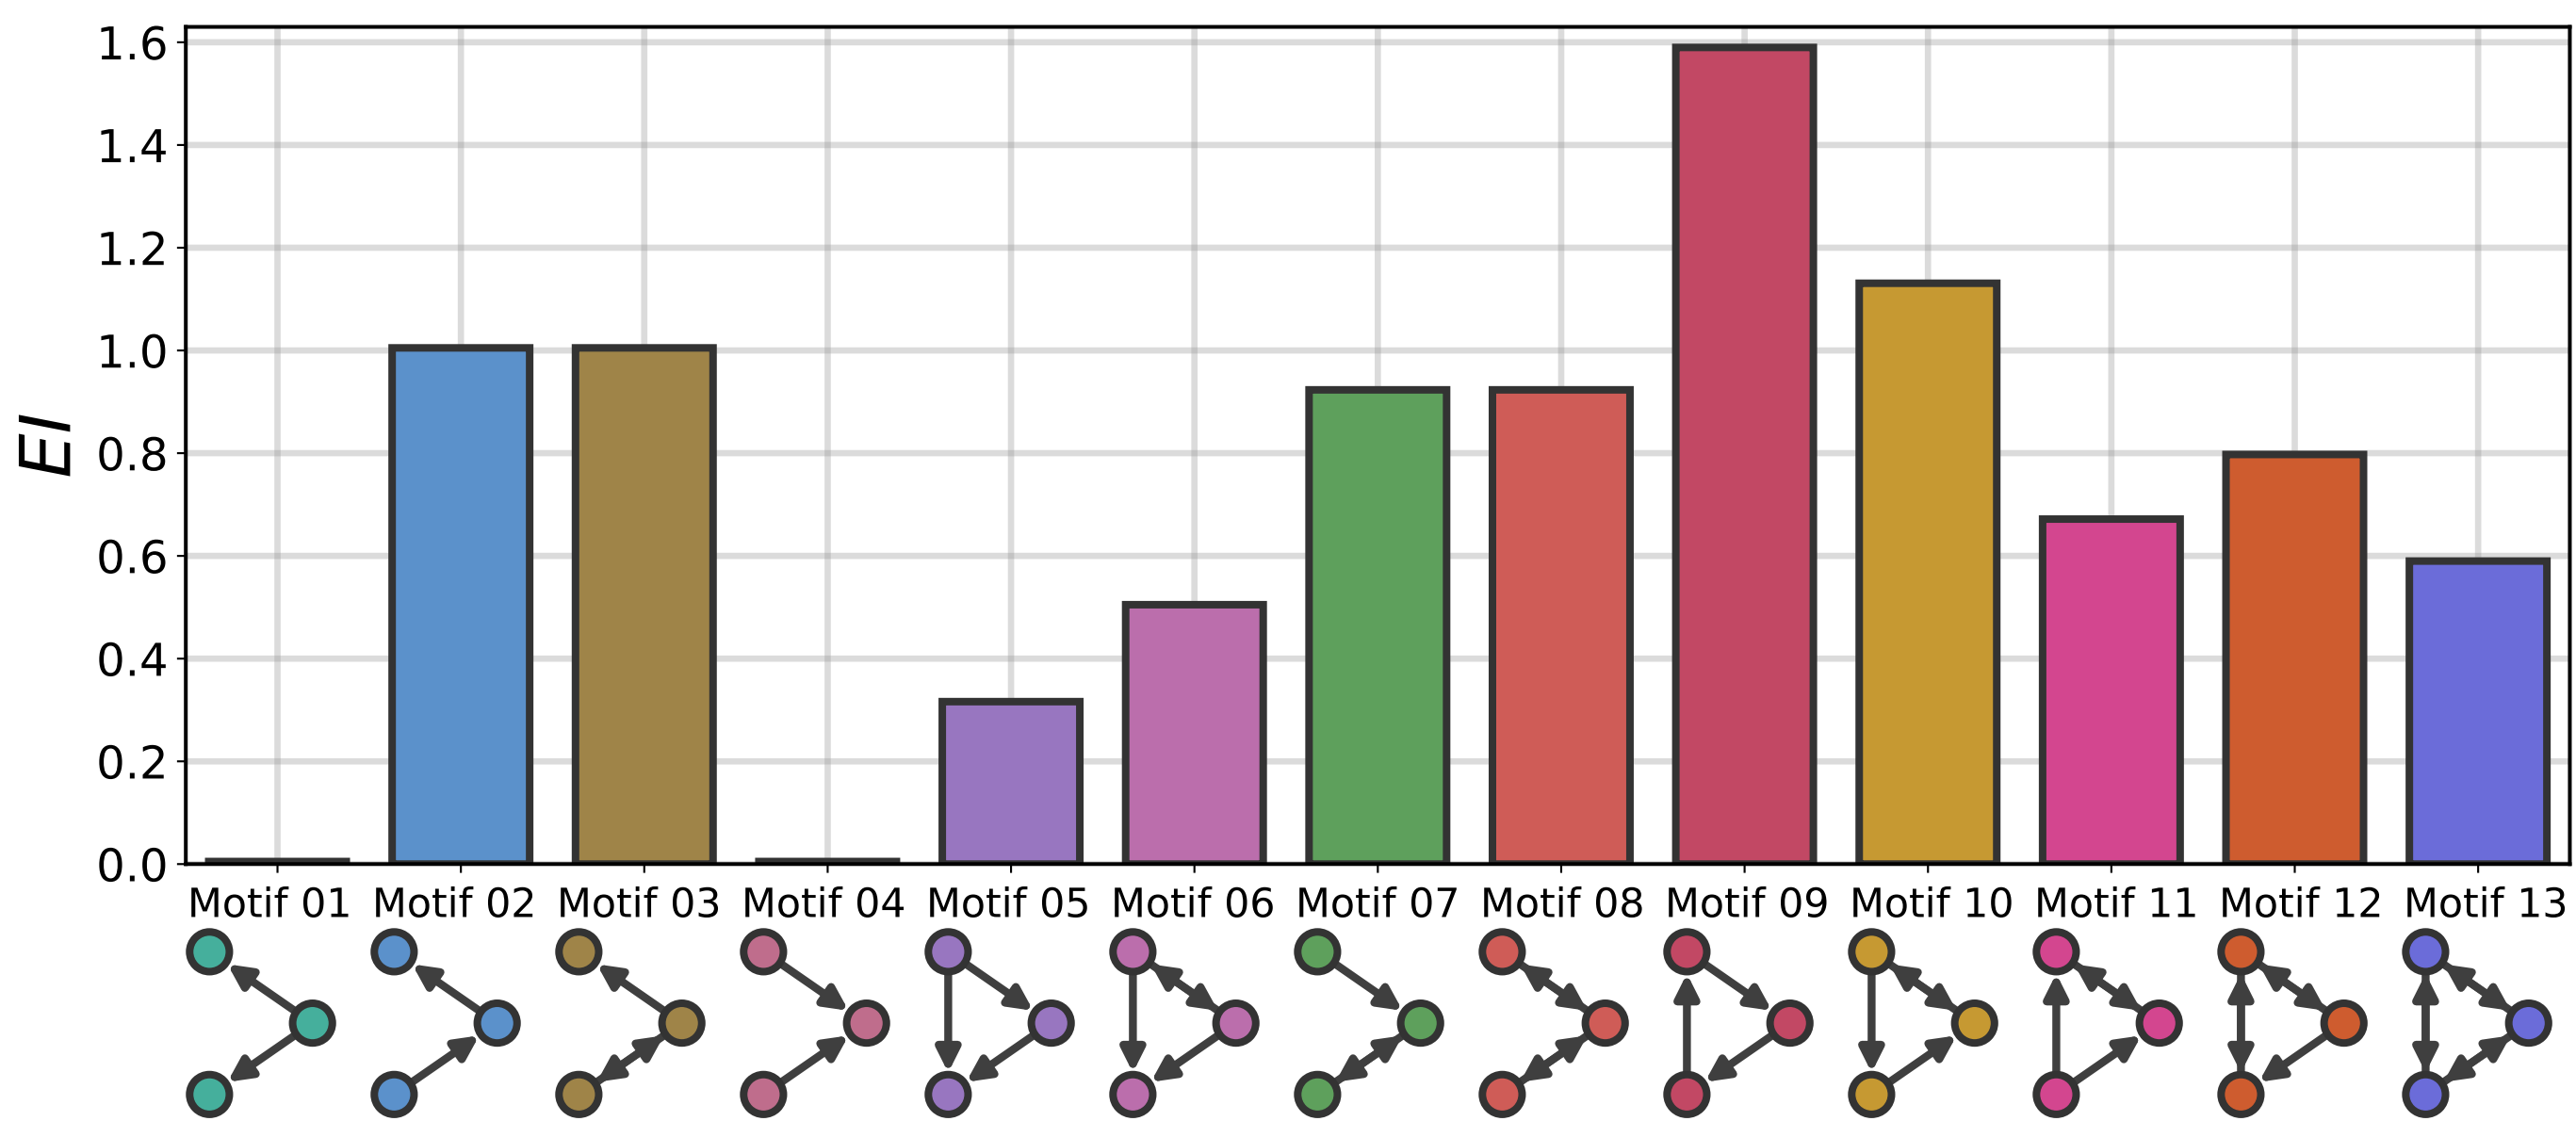

Supplement: f1 [file 8932526.f1.zip › 8932526.f1/EffectiveInformation_NetworkMotifs.pdf]

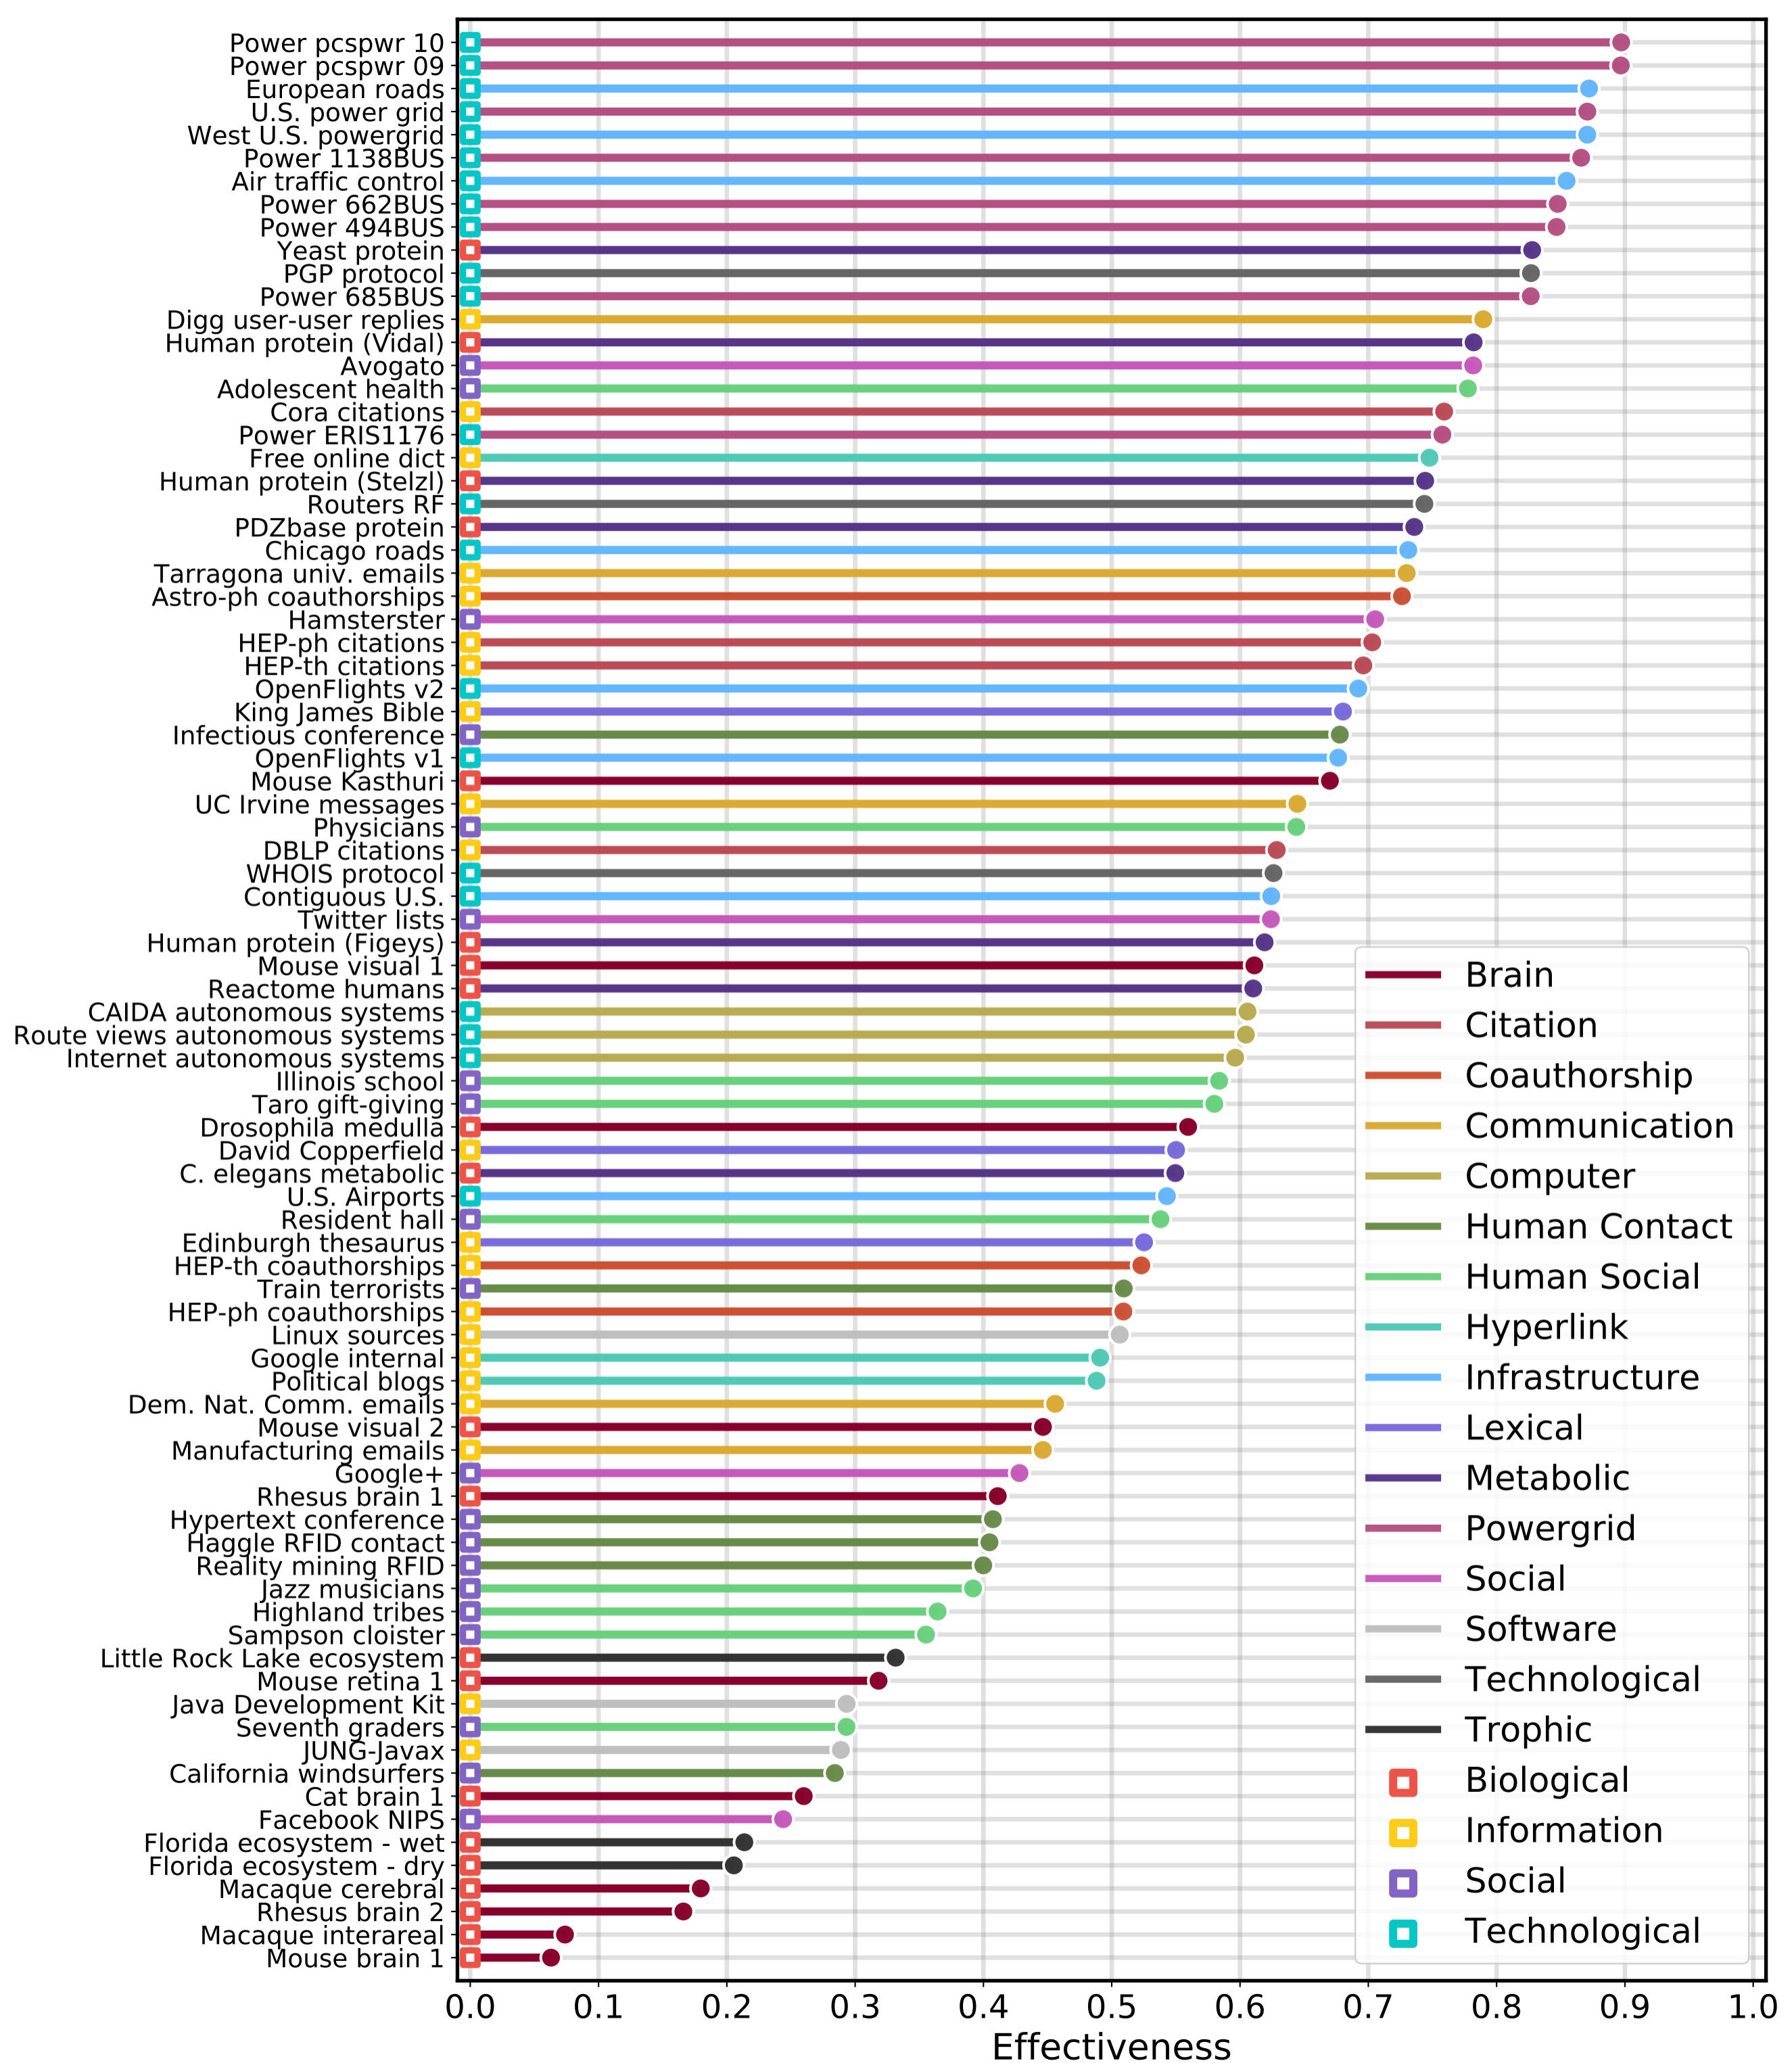

Supplement: f1 [file 8932526.f1.zip › 8932526.f1/Konect_SortedEffectiveness_withLabels.pdf]

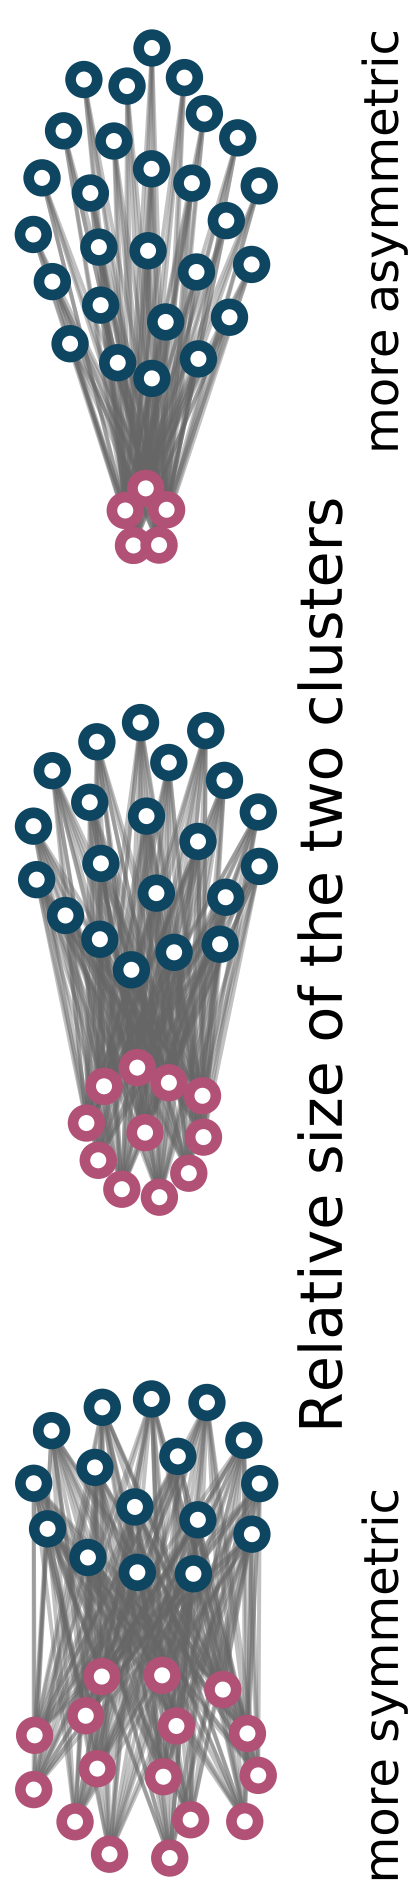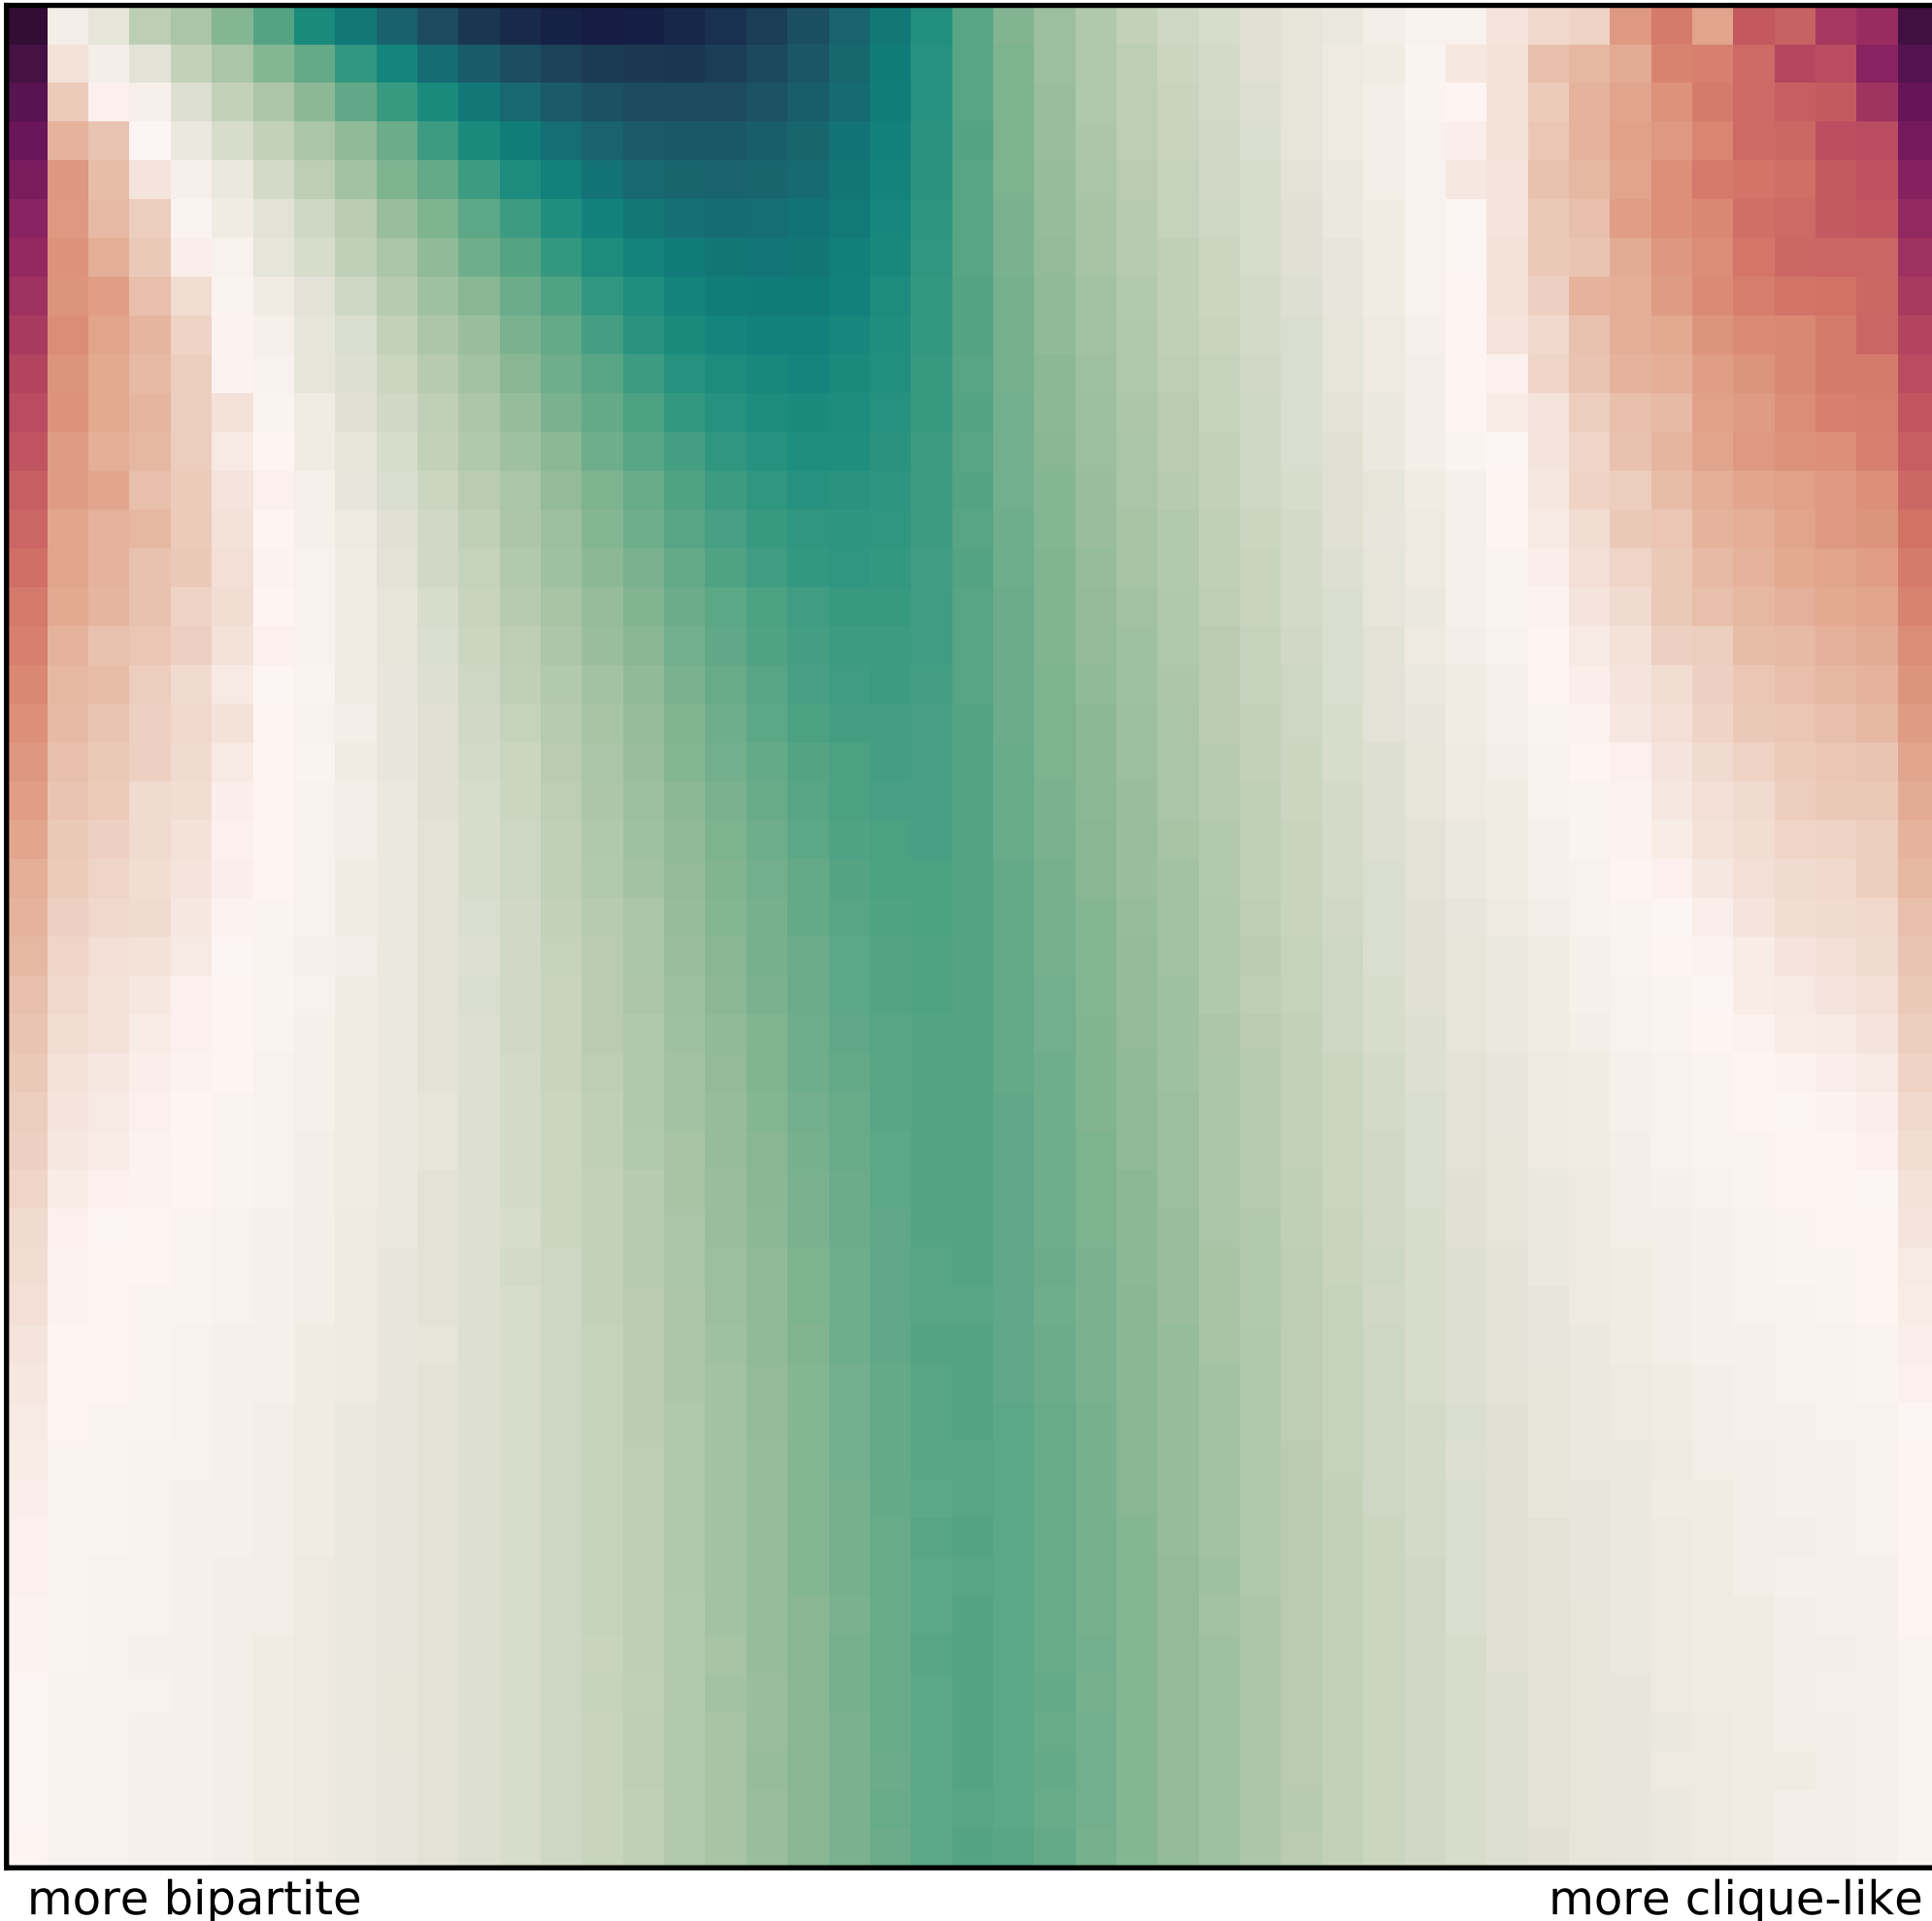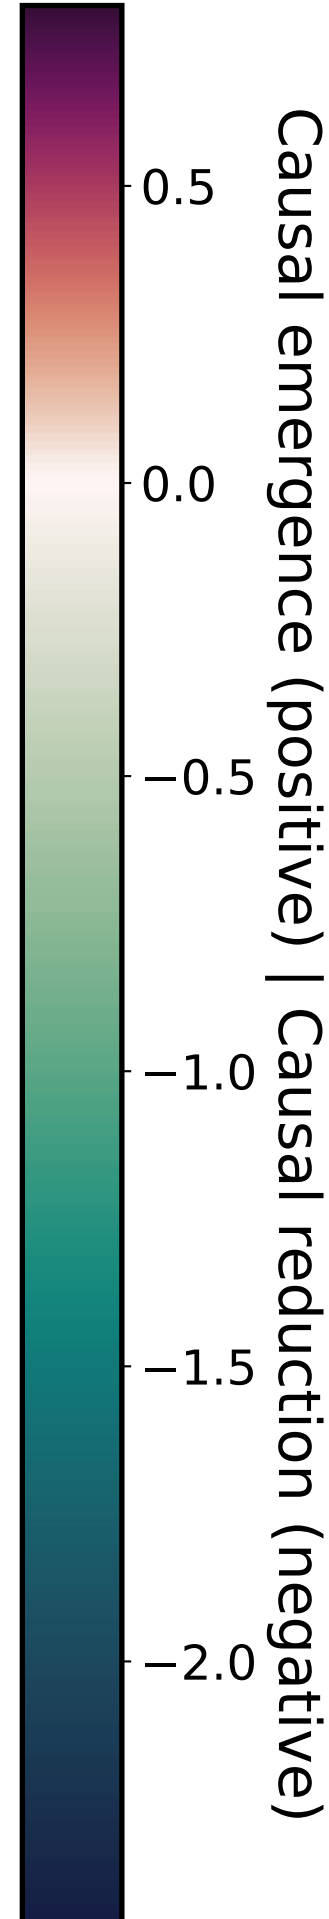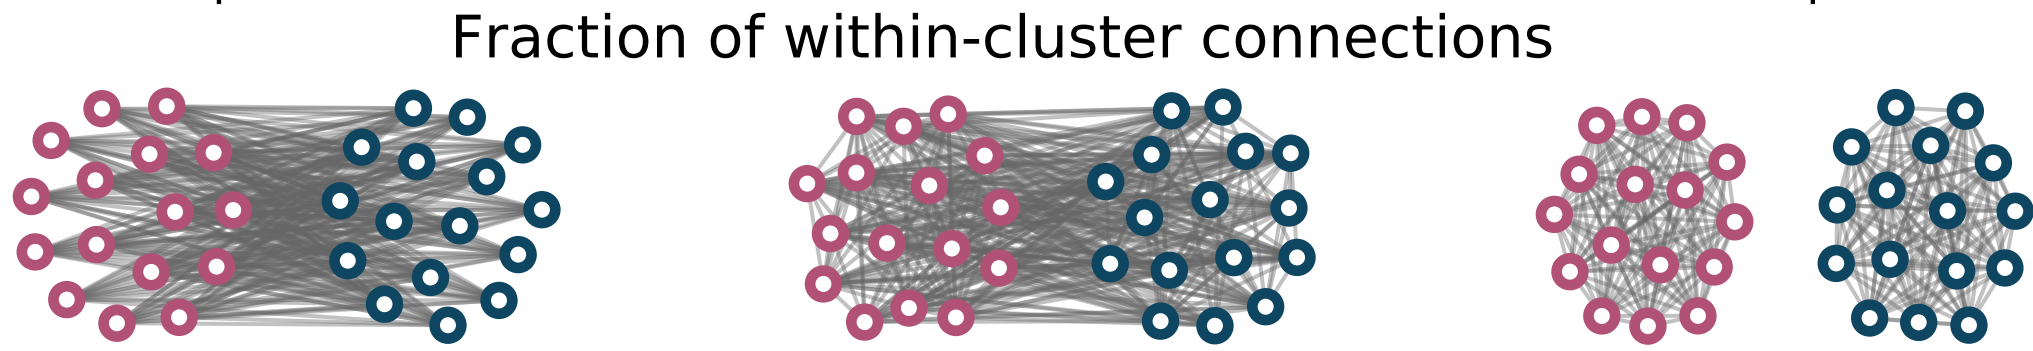

Supplement: f1 [file 8932526.f1.zip]
